# Supplementary material
Source: publisher figshare collection journal article supplement (https://gsajournals.figshare.com/ndownloader/files/12778424)
Supplement: Supplementary file 1 [file 12778424]

## Sheet: A) OL1.1 Results 
Ensembl 87-89 (6801)	Homologene (3776)	InParanoid (5581)	OrthoMCL (5699)
WBGene00000001	WBGene00000001	WBGene00000001	WBGene00000001
WBGene00000002	WBGene00000002	WBGene00000002	WBGene00000002
WBGene00000003	WBGene00000003	WBGene00000004	WBGene00000003
WBGene00000004	WBGene00000004	WBGene00000018	WBGene00000004
WBGene00000018	WBGene00000020	WBGene00000020	WBGene00000018
WBGene00000020	WBGene00000022	WBGene00000022	WBGene00000020
WBGene00000022	WBGene00000035	WBGene00000035	WBGene00000022
WBGene00000023	WBGene00000039	WBGene00000039	WBGene00000023
WBGene00000035	WBGene00000040	WBGene00000040	WBGene00000035
WBGene00000036	WBGene00000041	WBGene00000041	WBGene00000036
WBGene00000037	WBGene00000046	WBGene00000058	WBGene00000039
WBGene00000038	WBGene00000048	WBGene00000060	WBGene00000040
WBGene00000039	WBGene00000049	WBGene00000063	WBGene00000041
WBGene00000040	WBGene00000050	WBGene00000064	WBGene00000055
WBGene00000041	WBGene00000053	WBGene00000065	WBGene00000060
WBGene00000042	WBGene00000055	WBGene00000066	WBGene00000063
WBGene00000043	WBGene00000060	WBGene00000068	WBGene00000064
WBGene00000044	WBGene00000063	WBGene00000071	WBGene00000065
WBGene00000045	WBGene00000064	WBGene00000072	WBGene00000066
WBGene00000046	WBGene00000065	WBGene00000074	WBGene00000067
WBGene00000047	WBGene00000066	WBGene00000075	WBGene00000068
WBGene00000048	WBGene00000067	WBGene00000080	WBGene00000069
WBGene00000049	WBGene00000068	WBGene00000081	WBGene00000071
WBGene00000050	WBGene00000071	WBGene00000086	WBGene00000072
WBGene00000051	WBGene00000072	WBGene00000089	WBGene00000073
WBGene00000053	WBGene00000074	WBGene00000090	WBGene00000074
WBGene00000054	WBGene00000075	WBGene00000092	WBGene00000075
WBGene00000055	WBGene00000080	WBGene00000095	WBGene00000080
WBGene00000056	WBGene00000081	WBGene00000096	WBGene00000081
WBGene00000057	WBGene00000086	WBGene00000097	WBGene00000086
WBGene00000058	WBGene00000089	WBGene00000099	WBGene00000089
WBGene00000059	WBGene00000090	WBGene00000101	WBGene00000090
WBGene00000060	WBGene00000092	WBGene00000102	WBGene00000092
WBGene00000061	WBGene00000097	WBGene00000103	WBGene00000093
WBGene00000062	WBGene00000099	WBGene00000105	WBGene00000095
WBGene00000063	WBGene00000102	WBGene00000106	WBGene00000096
WBGene00000064	WBGene00000103	WBGene00000107	WBGene00000097
WBGene00000065	WBGene00000105	WBGene00000108	WBGene00000099
WBGene00000066	WBGene00000106	WBGene00000109	WBGene00000100
WBGene00000067	WBGene00000107	WBGene00000110	WBGene00000101
WBGene00000068	WBGene00000108	WBGene00000111	WBGene00000102
WBGene00000069	WBGene00000109	WBGene00000112	WBGene00000103
WBGene00000070	WBGene00000110	WBGene00000113	WBGene00000105
WBGene00000072	WBGene00000111	WBGene00000114	WBGene00000106
WBGene00000073	WBGene00000112	WBGene00000115	WBGene00000107
WBGene00000074	WBGene00000113	WBGene00000116	WBGene00000108
WBGene00000075	WBGene00000114	WBGene00000117	WBGene00000109
WBGene00000079	WBGene00000115	WBGene00000120	WBGene00000110
WBGene00000080	WBGene00000116	WBGene00000121	WBGene00000111
WBGene00000081	WBGene00000117	WBGene00000122	WBGene00000112
WBGene00000082	WBGene00000118	WBGene00000123	WBGene00000113
WBGene00000083	WBGene00000123	WBGene00000137	WBGene00000114
WBGene00000086	WBGene00000142	WBGene00000139	WBGene00000115
WBGene00000089	WBGene00000147	WBGene00000140	WBGene00000116
WBGene00000090	WBGene00000148	WBGene00000142	WBGene00000117
WBGene00000092	WBGene00000149	WBGene00000143	WBGene00000118
WBGene00000095	WBGene00000150	WBGene00000145	WBGene00000121
WBGene00000096	WBGene00000155	WBGene00000147	WBGene00000122
WBGene00000097	WBGene00000157	WBGene00000148	WBGene00000123
WBGene00000098	WBGene00000158	WBGene00000149	WBGene00000137
WBGene00000099	WBGene00000159	WBGene00000155	WBGene00000139
WBGene00000100	WBGene00000160	WBGene00000157	WBGene00000140
WBGene00000101	WBGene00000161	WBGene00000158	WBGene00000142
WBGene00000102	WBGene00000164	WBGene00000159	WBGene00000143
WBGene00000103	WBGene00000165	WBGene00000160	WBGene00000146
WBGene00000105	WBGene00000169	WBGene00000161	WBGene00000147
WBGene00000106	WBGene00000170	WBGene00000162	WBGene00000148
WBGene00000107	WBGene00000171	WBGene00000163	WBGene00000149
WBGene00000108	WBGene00000172	WBGene00000164	WBGene00000150
WBGene00000109	WBGene00000173	WBGene00000165	WBGene00000155
WBGene00000110	WBGene00000174	WBGene00000166	WBGene00000157
WBGene00000111	WBGene00000175	WBGene00000170	WBGene00000158
WBGene00000112	WBGene00000180	WBGene00000171	WBGene00000159
WBGene00000113	WBGene00000181	WBGene00000172	WBGene00000160
WBGene00000114	WBGene00000182	WBGene00000174	WBGene00000161
WBGene00000115	WBGene00000183	WBGene00000175	WBGene00000162
WBGene00000116	WBGene00000184	WBGene00000177	WBGene00000163
WBGene00000117	WBGene00000187	WBGene00000178	WBGene00000164
WBGene00000118	WBGene00000188	WBGene00000180	WBGene00000165
WBGene00000123	WBGene00000189	WBGene00000181	WBGene00000166
WBGene00000137	WBGene00000192	WBGene00000182	WBGene00000170
WBGene00000138	WBGene00000193	WBGene00000183	WBGene00000171
WBGene00000139	WBGene00000195	WBGene00000184	WBGene00000172
WBGene00000140	WBGene00000197	WBGene00000187	WBGene00000174
WBGene00000142	WBGene00000198	WBGene00000188	WBGene00000175
WBGene00000143	WBGene00000199	WBGene00000189	WBGene00000176
WBGene00000144	WBGene00000200	WBGene00000192	WBGene00000177
WBGene00000145	WBGene00000201	WBGene00000193	WBGene00000180
WBGene00000146	WBGene00000203	WBGene00000195	WBGene00000181
WBGene00000147	WBGene00000204	WBGene00000197	WBGene00000182
WBGene00000148	WBGene00000205	WBGene00000198	WBGene00000183
WBGene00000149	WBGene00000208	WBGene00000199	WBGene00000184
WBGene00000150	WBGene00000212	WBGene00000200	WBGene00000187
WBGene00000155	WBGene00000217	WBGene00000201	WBGene00000188
WBGene00000156	WBGene00000229	WBGene00000203	WBGene00000189
WBGene00000157	WBGene00000230	WBGene00000204	WBGene00000192
WBGene00000158	WBGene00000232	WBGene00000205	WBGene00000193
WBGene00000159	WBGene00000233	WBGene00000206	WBGene00000195
WBGene00000160	WBGene00000235	WBGene00000207	WBGene00000197
WBGene00000161	WBGene00000240	WBGene00000208	WBGene00000198
WBGene00000162	WBGene00000241	WBGene00000209	WBGene00000199
WBGene00000163	WBGene00000242	WBGene00000210	WBGene00000200
WBGene00000164	WBGene00000244	WBGene00000212	WBGene00000201
WBGene00000165	WBGene00000246	WBGene00000217	WBGene00000202
WBGene00000166	WBGene00000247	WBGene00000222	WBGene00000203
WBGene00000169	WBGene00000248	WBGene00000224	WBGene00000204
WBGene00000170	WBGene00000253	WBGene00000225	WBGene00000205
WBGene00000171	WBGene00000254	WBGene00000228	WBGene00000206
WBGene00000172	WBGene00000259	WBGene00000229	WBGene00000207
WBGene00000173	WBGene00000266	WBGene00000230	WBGene00000208
WBGene00000174	WBGene00000269	WBGene00000231	WBGene00000209
WBGene00000175	WBGene00000271	WBGene00000235	WBGene00000210
WBGene00000176	WBGene00000276	WBGene00000236	WBGene00000211
WBGene00000180	WBGene00000279	WBGene00000240	WBGene00000212
WBGene00000181	WBGene00000280	WBGene00000241	WBGene00000213
WBGene00000182	WBGene00000281	WBGene00000242	WBGene00000216
WBGene00000183	WBGene00000282	WBGene00000244	WBGene00000217
WBGene00000184	WBGene00000283	WBGene00000246	WBGene00000222
WBGene00000187	WBGene00000289	WBGene00000247	WBGene00000224
WBGene00000188	WBGene00000292	WBGene00000249	WBGene00000225
WBGene00000189	WBGene00000293	WBGene00000251	WBGene00000226
WBGene00000190	WBGene00000294	WBGene00000252	WBGene00000227
WBGene00000192	WBGene00000295	WBGene00000253	WBGene00000228
WBGene00000193	WBGene00000296	WBGene00000256	WBGene00000229
WBGene00000195	WBGene00000298	WBGene00000257	WBGene00000230
WBGene00000196	WBGene00000368	WBGene00000265	WBGene00000231
WBGene00000197	WBGene00000369	WBGene00000266	WBGene00000232
WBGene00000198	WBGene00000372	WBGene00000269	WBGene00000233
WBGene00000199	WBGene00000373	WBGene00000270	WBGene00000235
WBGene00000200	WBGene00000375	WBGene00000271	WBGene00000236
WBGene00000201	WBGene00000376	WBGene00000274	WBGene00000240
WBGene00000202	WBGene00000377	WBGene00000276	WBGene00000242
WBGene00000203	WBGene00000378	WBGene00000279	WBGene00000244
WBGene00000204	WBGene00000379	WBGene00000280	WBGene00000246
WBGene00000205	WBGene00000380	WBGene00000283	WBGene00000247
WBGene00000206	WBGene00000381	WBGene00000289	WBGene00000248
WBGene00000207	WBGene00000383	WBGene00000292	WBGene00000249
WBGene00000208	WBGene00000390	WBGene00000293	WBGene00000253
WBGene00000211	WBGene00000396	WBGene00000295	WBGene00000254
WBGene00000212	WBGene00000397	WBGene00000298	WBGene00000257
WBGene00000213	WBGene00000403	WBGene00000301	WBGene00000259
WBGene00000214	WBGene00000405	WBGene00000366	WBGene00000262
WBGene00000215	WBGene00000406	WBGene00000367	WBGene00000265
WBGene00000216	WBGene00000407	WBGene00000368	WBGene00000266
WBGene00000217	WBGene00000408	WBGene00000369	WBGene00000269
WBGene00000218	WBGene00000409	WBGene00000371	WBGene00000270
WBGene00000219	WBGene00000410	WBGene00000372	WBGene00000271
WBGene00000220	WBGene00000415	WBGene00000373	WBGene00000274
WBGene00000222	WBGene00000416	WBGene00000375	WBGene00000276
WBGene00000224	WBGene00000419	WBGene00000376	WBGene00000277
WBGene00000225	WBGene00000420	WBGene00000377	WBGene00000280
WBGene00000226	WBGene00000422	WBGene00000378	WBGene00000281
WBGene00000227	WBGene00000424	WBGene00000379	WBGene00000282
WBGene00000228	WBGene00000426	WBGene00000380	WBGene00000283
WBGene00000229	WBGene00000443	WBGene00000381	WBGene00000289
WBGene00000230	WBGene00000466	WBGene00000382	WBGene00000292
WBGene00000231	WBGene00000478	WBGene00000383	WBGene00000293
WBGene00000232	WBGene00000479	WBGene00000387	WBGene00000294
WBGene00000233	WBGene00000480	WBGene00000390	WBGene00000295
WBGene00000235	WBGene00000481	WBGene00000391	WBGene00000296
WBGene00000238	WBGene00000482	WBGene00000392	WBGene00000298
WBGene00000239	WBGene00000484	WBGene00000393	WBGene00000301
WBGene00000240	WBGene00000485	WBGene00000396	WBGene00000366
WBGene00000241	WBGene00000490	WBGene00000397	WBGene00000367
WBGene00000242	WBGene00000492	WBGene00000401	WBGene00000368
WBGene00000244	WBGene00000498	WBGene00000403	WBGene00000369
WBGene00000246	WBGene00000499	WBGene00000405	WBGene00000371
WBGene00000247	WBGene00000500	WBGene00000407	WBGene00000372
WBGene00000248	WBGene00000501	WBGene00000408	WBGene00000373
WBGene00000253	WBGene00000502	WBGene00000409	WBGene00000375
WBGene00000254	WBGene00000503	WBGene00000410	WBGene00000376
WBGene00000257	WBGene00000506	WBGene00000413	WBGene00000377
WBGene00000259	WBGene00000509	WBGene00000415	WBGene00000378
WBGene00000262	WBGene00000510	WBGene00000416	WBGene00000379
WBGene00000266	WBGene00000515	WBGene00000417	WBGene00000380
WBGene00000269	WBGene00000518	WBGene00000419	WBGene00000381
WBGene00000270	WBGene00000519	WBGene00000420	WBGene00000382
WBGene00000271	WBGene00000530	WBGene00000422	WBGene00000383
WBGene00000275	WBGene00000531	WBGene00000424	WBGene00000386
WBGene00000276	WBGene00000532	WBGene00000426	WBGene00000387
WBGene00000277	WBGene00000533	WBGene00000429	WBGene00000388
WBGene00000279	WBGene00000536	WBGene00000431	WBGene00000390
WBGene00000280	WBGene00000539	WBGene00000435	WBGene00000391
WBGene00000281	WBGene00000540	WBGene00000436	WBGene00000392
WBGene00000283	WBGene00000541	WBGene00000437	WBGene00000393
WBGene00000289	WBGene00000542	WBGene00000438	WBGene00000396
WBGene00000292	WBGene00000543	WBGene00000439	WBGene00000403
WBGene00000293	WBGene00000544	WBGene00000441	WBGene00000405
WBGene00000294	WBGene00000545	WBGene00000443	WBGene00000406
WBGene00000295	WBGene00000546	WBGene00000445	WBGene00000407
WBGene00000296	WBGene00000547	WBGene00000447	WBGene00000408
WBGene00000298	WBGene00000549	WBGene00000449	WBGene00000409
WBGene00000301	WBGene00000550	WBGene00000451	WBGene00000410
WBGene00000366	WBGene00000554	WBGene00000452	WBGene00000411
WBGene00000367	WBGene00000561	WBGene00000454	WBGene00000413
WBGene00000368	WBGene00000565	WBGene00000463	WBGene00000414
WBGene00000369	WBGene00000566	WBGene00000464	WBGene00000415
WBGene00000371	WBGene00000567	WBGene00000466	WBGene00000416
WBGene00000372	WBGene00000585	WBGene00000473	WBGene00000417
WBGene00000373	WBGene00000591	WBGene00000475	WBGene00000419
WBGene00000375	WBGene00000761	WBGene00000476	WBGene00000420
WBGene00000376	WBGene00000762	WBGene00000478	WBGene00000421
WBGene00000377	WBGene00000763	WBGene00000479	WBGene00000422
WBGene00000378	WBGene00000764	WBGene00000480	WBGene00000423
WBGene00000379	WBGene00000765	WBGene00000482	WBGene00000426
WBGene00000380	WBGene00000766	WBGene00000483	WBGene00000428
WBGene00000381	WBGene00000767	WBGene00000484	WBGene00000429
WBGene00000382	WBGene00000768	WBGene00000485	WBGene00000430
WBGene00000383	WBGene00000773	WBGene00000490	WBGene00000431
WBGene00000386	WBGene00000776	WBGene00000491	WBGene00000433
WBGene00000387	WBGene00000778	WBGene00000492	WBGene00000435
WBGene00000388	WBGene00000787	WBGene00000493	WBGene00000437
WBGene00000389	WBGene00000788	WBGene00000498	WBGene00000438
WBGene00000390	WBGene00000794	WBGene00000499	WBGene00000439
WBGene00000391	WBGene00000798	WBGene00000500	WBGene00000443
WBGene00000392	WBGene00000799	WBGene00000501	WBGene00000445
WBGene00000393	WBGene00000800	WBGene00000502	WBGene00000447
WBGene00000395	WBGene00000802	WBGene00000503	WBGene00000448
WBGene00000396	WBGene00000812	WBGene00000506	WBGene00000451
WBGene00000397	WBGene00000817	WBGene00000507	WBGene00000452
WBGene00000399	WBGene00000818	WBGene00000508	WBGene00000453
WBGene00000401	WBGene00000822	WBGene00000510	WBGene00000454
WBGene00000402	WBGene00000830	WBGene00000515	WBGene00000458
WBGene00000403	WBGene00000831	WBGene00000517	WBGene00000463
WBGene00000405	WBGene00000832	WBGene00000518	WBGene00000464
WBGene00000406	WBGene00000833	WBGene00000519	WBGene00000466
WBGene00000407	WBGene00000834	WBGene00000520	WBGene00000468
WBGene00000408	WBGene00000836	WBGene00000521	WBGene00000469
WBGene00000409	WBGene00000837	WBGene00000527	WBGene00000472
WBGene00000410	WBGene00000838	WBGene00000530	WBGene00000474
WBGene00000411	WBGene00000840	WBGene00000532	WBGene00000476
WBGene00000412	WBGene00000843	WBGene00000533	WBGene00000478
WBGene00000413	WBGene00000846	WBGene00000534	WBGene00000479
WBGene00000415	WBGene00000857	WBGene00000535	WBGene00000480
WBGene00000416	WBGene00000858	WBGene00000536	WBGene00000481
WBGene00000417	WBGene00000869	WBGene00000537	WBGene00000482
WBGene00000419	WBGene00000874	WBGene00000539	WBGene00000484
WBGene00000420	WBGene00000877	WBGene00000540	WBGene00000485
WBGene00000421	WBGene00000880	WBGene00000541	WBGene00000490
WBGene00000422	WBGene00000881	WBGene00000542	WBGene00000491
WBGene00000424	WBGene00000882	WBGene00000543	WBGene00000492
WBGene00000426	WBGene00000886	WBGene00000545	WBGene00000493
WBGene00000428	WBGene00000887	WBGene00000546	WBGene00000498
WBGene00000429	WBGene00000888	WBGene00000547	WBGene00000499
WBGene00000430	WBGene00000889	WBGene00000549	WBGene00000500
WBGene00000431	WBGene00000890	WBGene00000550	WBGene00000501
WBGene00000432	WBGene00000891	WBGene00000552	WBGene00000502
WBGene00000433	WBGene00000892	WBGene00000553	WBGene00000503
WBGene00000435	WBGene00000896	WBGene00000554	WBGene00000506
WBGene00000436	WBGene00000898	WBGene00000561	WBGene00000507
WBGene00000437	WBGene00000903	WBGene00000564	WBGene00000508
WBGene00000438	WBGene00000906	WBGene00000565	WBGene00000510
WBGene00000439	WBGene00000914	WBGene00000566	WBGene00000515
WBGene00000440	WBGene00000915	WBGene00000567	WBGene00000518
WBGene00000441	WBGene00000917	WBGene00000583	WBGene00000519
WBGene00000442	WBGene00000923	WBGene00000584	WBGene00000520
WBGene00000443	WBGene00000933	WBGene00000585	WBGene00000528
WBGene00000445	WBGene00000934	WBGene00000591	WBGene00000529
WBGene00000446	WBGene00000936	WBGene00000594	WBGene00000530
WBGene00000447	WBGene00000937	WBGene00000596	WBGene00000531
WBGene00000448	WBGene00000939	WBGene00000597	WBGene00000532
WBGene00000449	WBGene00000940	WBGene00000599	WBGene00000533
WBGene00000450	WBGene00000950	WBGene00000601	WBGene00000534
WBGene00000451	WBGene00000952	WBGene00000602	WBGene00000536
WBGene00000452	WBGene00000958	WBGene00000603	WBGene00000539
WBGene00000453	WBGene00000959	WBGene00000608	WBGene00000540
WBGene00000454	WBGene00000960	WBGene00000611	WBGene00000541
WBGene00000457	WBGene00000962	WBGene00000612	WBGene00000542
WBGene00000458	WBGene00000963	WBGene00000614	WBGene00000543
WBGene00000461	WBGene00000964	WBGene00000615	WBGene00000544
WBGene00000463	WBGene00000966	WBGene00000616	WBGene00000545
WBGene00000464	WBGene00000967	WBGene00000617	WBGene00000546
WBGene00000466	WBGene00000970	WBGene00000618	WBGene00000547
WBGene00000468	WBGene00000971	WBGene00000620	WBGene00000549
WBGene00000469	WBGene00000972	WBGene00000622	WBGene00000550
WBGene00000472	WBGene00000973	WBGene00000625	WBGene00000552
WBGene00000473	WBGene00000974	WBGene00000626	WBGene00000553
WBGene00000474	WBGene00000976	WBGene00000627	WBGene00000554
WBGene00000475	WBGene00000979	WBGene00000631	WBGene00000561
WBGene00000476	WBGene00000981	WBGene00000634	WBGene00000565
WBGene00000477	WBGene00000982	WBGene00000636	WBGene00000566
WBGene00000478	WBGene00000983	WBGene00000637	WBGene00000567
WBGene00000479	WBGene00000984	WBGene00000638	WBGene00000584
WBGene00000480	WBGene00000985	WBGene00000639	WBGene00000585
WBGene00000481	WBGene00000988	WBGene00000640	WBGene00000591
WBGene00000482	WBGene00000989	WBGene00000641	WBGene00000606
WBGene00000483	WBGene00000991	WBGene00000644	WBGene00000708
WBGene00000484	WBGene00000993	WBGene00000645	WBGene00000761
WBGene00000485	WBGene00000996	WBGene00000647	WBGene00000762
WBGene00000490	WBGene00001001	WBGene00000648	WBGene00000763
WBGene00000491	WBGene00001005	WBGene00000649	WBGene00000764
WBGene00000492	WBGene00001006	WBGene00000650	WBGene00000765
WBGene00000493	WBGene00001007	WBGene00000651	WBGene00000766
WBGene00000498	WBGene00001016	WBGene00000653	WBGene00000767
WBGene00000499	WBGene00001018	WBGene00000654	WBGene00000768
WBGene00000500	WBGene00001019	WBGene00000655	WBGene00000770
WBGene00000501	WBGene00001020	WBGene00000656	WBGene00000771
WBGene00000502	WBGene00001025	WBGene00000657	WBGene00000772
WBGene00000503	WBGene00001026	WBGene00000659	WBGene00000773
WBGene00000506	WBGene00001027	WBGene00000660	WBGene00000774
WBGene00000507	WBGene00001029	WBGene00000661	WBGene00000776
WBGene00000508	WBGene00001030	WBGene00000663	WBGene00000777
WBGene00000509	WBGene00001031	WBGene00000664	WBGene00000778
WBGene00000510	WBGene00001033	WBGene00000665	WBGene00000780
WBGene00000511	WBGene00001035	WBGene00000666	WBGene00000782
WBGene00000512	WBGene00001037	WBGene00000667	WBGene00000784
WBGene00000513	WBGene00001038	WBGene00000668	WBGene00000785
WBGene00000514	WBGene00001039	WBGene00000669	WBGene00000786
WBGene00000515	WBGene00001041	WBGene00000670	WBGene00000787
WBGene00000518	WBGene00001042	WBGene00000671	WBGene00000788
WBGene00000519	WBGene00001045	WBGene00000675	WBGene00000792
WBGene00000521	WBGene00001046	WBGene00000676	WBGene00000793
WBGene00000527	WBGene00001047	WBGene00000678	WBGene00000794
WBGene00000528	WBGene00001048	WBGene00000679	WBGene00000795
WBGene00000529	WBGene00001050	WBGene00000680	WBGene00000796
WBGene00000530	WBGene00001051	WBGene00000681	WBGene00000798
WBGene00000531	WBGene00001052	WBGene00000682	WBGene00000799
WBGene00000532	WBGene00001053	WBGene00000685	WBGene00000800
WBGene00000533	WBGene00001054	WBGene00000687	WBGene00000802
WBGene00000536	WBGene00001055	WBGene00000690	WBGene00000803
WBGene00000539	WBGene00001056	WBGene00000691	WBGene00000812
WBGene00000540	WBGene00001058	WBGene00000692	WBGene00000813
WBGene00000541	WBGene00001073	WBGene00000693	WBGene00000814
WBGene00000542	WBGene00001077	WBGene00000694	WBGene00000815
WBGene00000543	WBGene00001078	WBGene00000696	WBGene00000816
WBGene00000544	WBGene00001082	WBGene00000697	WBGene00000817
WBGene00000545	WBGene00001089	WBGene00000698	WBGene00000818
WBGene00000546	WBGene00001090	WBGene00000699	WBGene00000822
WBGene00000547	WBGene00001092	WBGene00000700	WBGene00000830
WBGene00000548	WBGene00001093	WBGene00000701	WBGene00000831
WBGene00000549	WBGene00001094	WBGene00000703	WBGene00000832
WBGene00000550	WBGene00001095	WBGene00000704	WBGene00000833
WBGene00000552	WBGene00001101	WBGene00000705	WBGene00000834
WBGene00000553	WBGene00001102	WBGene00000706	WBGene00000835
WBGene00000554	WBGene00001115	WBGene00000707	WBGene00000836
WBGene00000561	WBGene00001117	WBGene00000708	WBGene00000837
WBGene00000564	WBGene00001118	WBGene00000710	WBGene00000838
WBGene00000565	WBGene00001119	WBGene00000711	WBGene00000839
WBGene00000566	WBGene00001122	WBGene00000713	WBGene00000840
WBGene00000567	WBGene00001129	WBGene00000714	WBGene00000841
WBGene00000583	WBGene00001130	WBGene00000715	WBGene00000843
WBGene00000584	WBGene00001134	WBGene00000716	WBGene00000846
WBGene00000585	WBGene00001135	WBGene00000717	WBGene00000854
WBGene00000591	WBGene00001137	WBGene00000718	WBGene00000857
WBGene00000603	WBGene00001149	WBGene00000719	WBGene00000858
WBGene00000625	WBGene00001150	WBGene00000720	WBGene00000863
WBGene00000674	WBGene00001151	WBGene00000721	WBGene00000865
WBGene00000708	WBGene00001153	WBGene00000722	WBGene00000866
WBGene00000750	WBGene00001154	WBGene00000723	WBGene00000867
WBGene00000761	WBGene00001155	WBGene00000724	WBGene00000868
WBGene00000762	WBGene00001160	WBGene00000725	WBGene00000869
WBGene00000763	WBGene00001166	WBGene00000726	WBGene00000870
WBGene00000764	WBGene00001167	WBGene00000727	WBGene00000871
WBGene00000765	WBGene00001172	WBGene00000728	WBGene00000872
WBGene00000766	WBGene00001173	WBGene00000729	WBGene00000874
WBGene00000767	WBGene00001177	WBGene00000730	WBGene00000875
WBGene00000768	WBGene00001179	WBGene00000731	WBGene00000876
WBGene00000770	WBGene00001184	WBGene00000732	WBGene00000877
WBGene00000771	WBGene00001187	WBGene00000733	WBGene00000878
WBGene00000772	WBGene00001188	WBGene00000734	WBGene00000879
WBGene00000773	WBGene00001189	WBGene00000735	WBGene00000880
WBGene00000774	WBGene00001196	WBGene00000737	WBGene00000881
WBGene00000776	WBGene00001202	WBGene00000738	WBGene00000882
WBGene00000777	WBGene00001208	WBGene00000739	WBGene00000883
WBGene00000778	WBGene00001209	WBGene00000740	WBGene00000884
WBGene00000779	WBGene00001224	WBGene00000741	WBGene00000886
WBGene00000780	WBGene00001226	WBGene00000742	WBGene00000887
WBGene00000781	WBGene00001227	WBGene00000743	WBGene00000888
WBGene00000782	WBGene00001228	WBGene00000744	WBGene00000889
WBGene00000783	WBGene00001229	WBGene00000745	WBGene00000890
WBGene00000784	WBGene00001230	WBGene00000746	WBGene00000891
WBGene00000785	WBGene00001231	WBGene00000747	WBGene00000892
WBGene00000786	WBGene00001232	WBGene00000748	WBGene00000894
WBGene00000787	WBGene00001233	WBGene00000749	WBGene00000895
WBGene00000788	WBGene00001234	WBGene00000751	WBGene00000896
WBGene00000789	WBGene00001236	WBGene00000752	WBGene00000897
WBGene00000792	WBGene00001241	WBGene00000753	WBGene00000898
WBGene00000793	WBGene00001248	WBGene00000754	WBGene00000900
WBGene00000794	WBGene00001258	WBGene00000755	WBGene00000903
WBGene00000796	WBGene00001259	WBGene00000757	WBGene00000906
WBGene00000797	WBGene00001262	WBGene00000759	WBGene00000911
WBGene00000798	WBGene00001263	WBGene00000761	WBGene00000912
WBGene00000799	WBGene00001303	WBGene00000762	WBGene00000913
WBGene00000800	WBGene00001328	WBGene00000763	WBGene00000914
WBGene00000802	WBGene00001330	WBGene00000764	WBGene00000915
WBGene00000803	WBGene00001331	WBGene00000765	WBGene00000917
WBGene00000812	WBGene00001332	WBGene00000766	WBGene00000923
WBGene00000813	WBGene00001333	WBGene00000767	WBGene00000929
WBGene00000814	WBGene00001334	WBGene00000768	WBGene00000931
WBGene00000815	WBGene00001335	WBGene00000773	WBGene00000933
WBGene00000816	WBGene00001336	WBGene00000774	WBGene00000934
WBGene00000817	WBGene00001338	WBGene00000775	WBGene00000935
WBGene00000818	WBGene00001340	WBGene00000776	WBGene00000936
WBGene00000819	WBGene00001352	WBGene00000778	WBGene00000937
WBGene00000820	WBGene00001358	WBGene00000785	WBGene00000938
WBGene00000821	WBGene00001366	WBGene00000786	WBGene00000939
WBGene00000822	WBGene00001368	WBGene00000787	WBGene00000940
WBGene00000829	WBGene00001377	WBGene00000788	WBGene00000941
WBGene00000830	WBGene00001395	WBGene00000792	WBGene00000942
WBGene00000831	WBGene00001396	WBGene00000793	WBGene00000958
WBGene00000832	WBGene00001403	WBGene00000794	WBGene00000959
WBGene00000833	WBGene00001404	WBGene00000795	WBGene00000960
WBGene00000834	WBGene00001405	WBGene00000796	WBGene00000961
WBGene00000836	WBGene00001406	WBGene00000798	WBGene00000962
WBGene00000837	WBGene00001411	WBGene00000799	WBGene00000963
WBGene00000838	WBGene00001414	WBGene00000800	WBGene00000964
WBGene00000839	WBGene00001423	WBGene00000802	WBGene00000966
WBGene00000840	WBGene00001425	WBGene00000812	WBGene00000967
WBGene00000841	WBGene00001426	WBGene00000813	WBGene00000968
WBGene00000843	WBGene00001428	WBGene00000814	WBGene00000970
WBGene00000846	WBGene00001429	WBGene00000815	WBGene00000971
WBGene00000854	WBGene00001430	WBGene00000816	WBGene00000973
WBGene00000857	WBGene00001431	WBGene00000817	WBGene00000974
WBGene00000858	WBGene00001443	WBGene00000818	WBGene00000976
WBGene00000865	WBGene00001475	WBGene00000819	WBGene00000979
WBGene00000866	WBGene00001476	WBGene00000822	WBGene00000981
WBGene00000867	WBGene00001477	WBGene00000829	WBGene00000982
WBGene00000868	WBGene00001478	WBGene00000830	WBGene00000983
WBGene00000869	WBGene00001480	WBGene00000831	WBGene00000984
WBGene00000870	WBGene00001485	WBGene00000832	WBGene00000985
WBGene00000871	WBGene00001487	WBGene00000833	WBGene00000988
WBGene00000872	WBGene00001488	WBGene00000834	WBGene00000991
WBGene00000874	WBGene00001497	WBGene00000835	WBGene00000992
WBGene00000875	WBGene00001498	WBGene00000836	WBGene00000993
WBGene00000876	WBGene00001499	WBGene00000837	WBGene00000994
WBGene00000880	WBGene00001502	WBGene00000838	WBGene00000996
WBGene00000881	WBGene00001503	WBGene00000840	WBGene00001001
WBGene00000882	WBGene00001508	WBGene00000843	WBGene00001002
WBGene00000884	WBGene00001509	WBGene00000846	WBGene00001005
WBGene00000885	WBGene00001510	WBGene00000854	WBGene00001006
WBGene00000886	WBGene00001512	WBGene00000857	WBGene00001007
WBGene00000887	WBGene00001513	WBGene00000858	WBGene00001008
WBGene00000888	WBGene00001515	WBGene00000863	WBGene00001016
WBGene00000889	WBGene00001519	WBGene00000865	WBGene00001017
WBGene00000890	WBGene00001520	WBGene00000866	WBGene00001018
WBGene00000891	WBGene00001522	WBGene00000867	WBGene00001019
WBGene00000892	WBGene00001523	WBGene00000869	WBGene00001020
WBGene00000894	WBGene00001526	WBGene00000870	WBGene00001022
WBGene00000895	WBGene00001527	WBGene00000871	WBGene00001025
WBGene00000896	WBGene00001552	WBGene00000872	WBGene00001026
WBGene00000898	WBGene00001554	WBGene00000874	WBGene00001027
WBGene00000899	WBGene00001555	WBGene00000875	WBGene00001028
WBGene00000900	WBGene00001556	WBGene00000876	WBGene00001029
WBGene00000902	WBGene00001557	WBGene00000877	WBGene00001030
WBGene00000904	WBGene00001558	WBGene00000878	WBGene00001031
WBGene00000906	WBGene00001577	WBGene00000879	WBGene00001032
WBGene00000910	WBGene00001579	WBGene00000880	WBGene00001033
WBGene00000911	WBGene00001580	WBGene00000881	WBGene00001035
WBGene00000912	WBGene00001582	WBGene00000882	WBGene00001037
WBGene00000913	WBGene00001585	WBGene00000883	WBGene00001038
WBGene00000914	WBGene00001590	WBGene00000884	WBGene00001039
WBGene00000915	WBGene00001591	WBGene00000886	WBGene00001040
WBGene00000917	WBGene00001592	WBGene00000887	WBGene00001041
WBGene00000923	WBGene00001593	WBGene00000888	WBGene00001042
WBGene00000929	WBGene00001602	WBGene00000889	WBGene00001045
WBGene00000931	WBGene00001612	WBGene00000890	WBGene00001046
WBGene00000933	WBGene00001613	WBGene00000891	WBGene00001047
WBGene00000934	WBGene00001614	WBGene00000892	WBGene00001048
WBGene00000935	WBGene00001615	WBGene00000896	WBGene00001049
WBGene00000936	WBGene00001616	WBGene00000897	WBGene00001050
WBGene00000937	WBGene00001620	WBGene00000898	WBGene00001051
WBGene00000938	WBGene00001623	WBGene00000900	WBGene00001052
WBGene00000939	WBGene00001626	WBGene00000903	WBGene00001054
WBGene00000940	WBGene00001627	WBGene00000906	WBGene00001055
WBGene00000941	WBGene00001628	WBGene00000908	WBGene00001056
WBGene00000942	WBGene00001629	WBGene00000911	WBGene00001058
WBGene00000950	WBGene00001632	WBGene00000914	WBGene00001061
WBGene00000951	WBGene00001635	WBGene00000915	WBGene00001068
WBGene00000952	WBGene00001636	WBGene00000917	WBGene00001073
WBGene00000955	WBGene00001638	WBGene00000923	WBGene00001077
WBGene00000958	WBGene00001639	WBGene00000929	WBGene00001078
WBGene00000959	WBGene00001640	WBGene00000931	WBGene00001080
WBGene00000960	WBGene00001641	WBGene00000933	WBGene00001082
WBGene00000962	WBGene00001642	WBGene00000934	WBGene00001086
WBGene00000963	WBGene00001643	WBGene00000936	WBGene00001087
WBGene00000964	WBGene00001644	WBGene00000937	WBGene00001088
WBGene00000965	WBGene00001645	WBGene00000938	WBGene00001089
WBGene00000966	WBGene00001646	WBGene00000939	WBGene00001090
WBGene00000967	WBGene00001647	WBGene00000940	WBGene00001092
WBGene00000968	WBGene00001648	WBGene00000941	WBGene00001093
WBGene00000969	WBGene00001650	WBGene00000942	WBGene00001094
WBGene00000970	WBGene00001651	WBGene00000950	WBGene00001095
WBGene00000971	WBGene00001660	WBGene00000952	WBGene00001101
WBGene00000972	WBGene00001661	WBGene00000958	WBGene00001115
WBGene00000973	WBGene00001662	WBGene00000959	WBGene00001116
WBGene00000974	WBGene00001674	WBGene00000960	WBGene00001117
WBGene00000976	WBGene00001678	WBGene00000961	WBGene00001118
WBGene00000979	WBGene00001679	WBGene00000962	WBGene00001119
WBGene00000980	WBGene00001680	WBGene00000963	WBGene00001121
WBGene00000981	WBGene00001683	WBGene00000964	WBGene00001122
WBGene00000982	WBGene00001684	WBGene00000966	WBGene00001127
WBGene00000983	WBGene00001685	WBGene00000967	WBGene00001129
WBGene00000984	WBGene00001686	WBGene00000970	WBGene00001130
WBGene00000987	WBGene00001687	WBGene00000971	WBGene00001131
WBGene00000988	WBGene00001708	WBGene00000972	WBGene00001132
WBGene00000989	WBGene00001709	WBGene00000973	WBGene00001134
WBGene00000990	WBGene00001740	WBGene00000974	WBGene00001135
WBGene00000991	WBGene00001743	WBGene00000976	WBGene00001137
WBGene00000993	WBGene00001744	WBGene00000977	WBGene00001145
WBGene00000994	WBGene00001745	WBGene00000978	WBGene00001149
WBGene00000996	WBGene00001746	WBGene00000979	WBGene00001150
WBGene00001001	WBGene00001747	WBGene00000981	WBGene00001151
WBGene00001002	WBGene00001748	WBGene00000982	WBGene00001153
WBGene00001005	WBGene00001750	WBGene00000983	WBGene00001154
WBGene00001006	WBGene00001751	WBGene00000984	WBGene00001155
WBGene00001007	WBGene00001752	WBGene00000985	WBGene00001156
WBGene00001008	WBGene00001753	WBGene00000986	WBGene00001160
WBGene00001016	WBGene00001754	WBGene00000988	WBGene00001161
WBGene00001017	WBGene00001755	WBGene00000989	WBGene00001163
WBGene00001018	WBGene00001756	WBGene00000993	WBGene00001167
WBGene00001019	WBGene00001757	WBGene00000994	WBGene00001168
WBGene00001020	WBGene00001759	WBGene00000996	WBGene00001169
WBGene00001022	WBGene00001760	WBGene00001001	WBGene00001171
WBGene00001023	WBGene00001761	WBGene00001002	WBGene00001172
WBGene00001025	WBGene00001762	WBGene00001005	WBGene00001173
WBGene00001026	WBGene00001763	WBGene00001006	WBGene00001177
WBGene00001027	WBGene00001764	WBGene00001007	WBGene00001178
WBGene00001028	WBGene00001765	WBGene00001008	WBGene00001179
WBGene00001029	WBGene00001766	WBGene00001016	WBGene00001184
WBGene00001030	WBGene00001767	WBGene00001017	WBGene00001187
WBGene00001031	WBGene00001768	WBGene00001018	WBGene00001188
WBGene00001032	WBGene00001769	WBGene00001019	WBGene00001189
WBGene00001033	WBGene00001770	WBGene00001020	WBGene00001194
WBGene00001034	WBGene00001772	WBGene00001022	WBGene00001196
WBGene00001035	WBGene00001774	WBGene00001025	WBGene00001202
WBGene00001036	WBGene00001775	WBGene00001026	WBGene00001204
WBGene00001038	WBGene00001776	WBGene00001027	WBGene00001207
WBGene00001039	WBGene00001777	WBGene00001028	WBGene00001208
WBGene00001040	WBGene00001778	WBGene00001029	WBGene00001209
WBGene00001041	WBGene00001779	WBGene00001030	WBGene00001210
WBGene00001042	WBGene00001780	WBGene00001031	WBGene00001215
WBGene00001044	WBGene00001781	WBGene00001032	WBGene00001223
WBGene00001045	WBGene00001782	WBGene00001033	WBGene00001224
WBGene00001046	WBGene00001783	WBGene00001035	WBGene00001225
WBGene00001047	WBGene00001784	WBGene00001036	WBGene00001226
WBGene00001048	WBGene00001785	WBGene00001037	WBGene00001227
WBGene00001049	WBGene00001786	WBGene00001038	WBGene00001228
WBGene00001050	WBGene00001787	WBGene00001039	WBGene00001229
WBGene00001051	WBGene00001790	WBGene00001040	WBGene00001230
WBGene00001052	WBGene00001791	WBGene00001041	WBGene00001231
WBGene00001053	WBGene00001792	WBGene00001042	WBGene00001232
WBGene00001054	WBGene00001793	WBGene00001043	WBGene00001233
WBGene00001055	WBGene00001794	WBGene00001045	WBGene00001234
WBGene00001056	WBGene00001808	WBGene00001046	WBGene00001235
WBGene00001057	WBGene00001811	WBGene00001047	WBGene00001236
WBGene00001058	WBGene00001812	WBGene00001048	WBGene00001239
WBGene00001059	WBGene00001813	WBGene00001049	WBGene00001241
WBGene00001061	WBGene00001814	WBGene00001050	WBGene00001242
WBGene00001073	WBGene00001815	WBGene00001051	WBGene00001245
WBGene00001077	WBGene00001816	WBGene00001052	WBGene00001248
WBGene00001078	WBGene00001817	WBGene00001053	WBGene00001249
WBGene00001080	WBGene00001818	WBGene00001054	WBGene00001258
WBGene00001081	WBGene00001819	WBGene00001055	WBGene00001259
WBGene00001082	WBGene00001823	WBGene00001056	WBGene00001262
WBGene00001086	WBGene00001827	WBGene00001058	WBGene00001263
WBGene00001087	WBGene00001834	WBGene00001064	WBGene00001281
WBGene00001088	WBGene00001836	WBGene00001065	WBGene00001303
WBGene00001089	WBGene00001840	WBGene00001066	WBGene00001320
WBGene00001090	WBGene00001843	WBGene00001067	WBGene00001328
WBGene00001092	WBGene00001844	WBGene00001069	WBGene00001329
WBGene00001093	WBGene00001860	WBGene00001073	WBGene00001330
WBGene00001094	WBGene00001863	WBGene00001074	WBGene00001331
WBGene00001095	WBGene00001872	WBGene00001075	WBGene00001332
WBGene00001096	WBGene00001876	WBGene00001076	WBGene00001333
WBGene00001101	WBGene00001877	WBGene00001077	WBGene00001334
WBGene00001102	WBGene00001878	WBGene00001078	WBGene00001335
WBGene00001106	WBGene00001879	WBGene00001080	WBGene00001336
WBGene00001115	WBGene00001880	WBGene00001081	WBGene00001338
WBGene00001116	WBGene00001881	WBGene00001082	WBGene00001340
WBGene00001117	WBGene00001882	WBGene00001087	WBGene00001352
WBGene00001118	WBGene00001883	WBGene00001089	WBGene00001358
WBGene00001119	WBGene00001885	WBGene00001090	WBGene00001365
WBGene00001121	WBGene00001886	WBGene00001092	WBGene00001366
WBGene00001122	WBGene00001887	WBGene00001093	WBGene00001368
WBGene00001127	WBGene00001888	WBGene00001094	WBGene00001371
WBGene00001129	WBGene00001889	WBGene00001095	WBGene00001372
WBGene00001130	WBGene00001890	WBGene00001096	WBGene00001374
WBGene00001131	WBGene00001891	WBGene00001101	WBGene00001377
WBGene00001132	WBGene00001892	WBGene00001102	WBGene00001395
WBGene00001133	WBGene00001893	WBGene00001106	WBGene00001396
WBGene00001134	WBGene00001894	WBGene00001115	WBGene00001397
WBGene00001135	WBGene00001895	WBGene00001117	WBGene00001398
WBGene00001137	WBGene00001896	WBGene00001118	WBGene00001399
WBGene00001145	WBGene00001899	WBGene00001119	WBGene00001400
WBGene00001149	WBGene00001901	WBGene00001121	WBGene00001403
WBGene00001150	WBGene00001903	WBGene00001127	WBGene00001404
WBGene00001151	WBGene00001904	WBGene00001129	WBGene00001405
WBGene00001153	WBGene00001905	WBGene00001130	WBGene00001406
WBGene00001154	WBGene00001906	WBGene00001131	WBGene00001410
WBGene00001155	WBGene00001907	WBGene00001132	WBGene00001411
WBGene00001156	WBGene00001908	WBGene00001134	WBGene00001412
WBGene00001157	WBGene00001909	WBGene00001135	WBGene00001414
WBGene00001158	WBGene00001912	WBGene00001137	WBGene00001423
WBGene00001160	WBGene00001915	WBGene00001149	WBGene00001426
WBGene00001161	WBGene00001916	WBGene00001150	WBGene00001427
WBGene00001162	WBGene00001917	WBGene00001151	WBGene00001428
WBGene00001163	WBGene00001918	WBGene00001153	WBGene00001430
WBGene00001164	WBGene00001919	WBGene00001154	WBGene00001431
WBGene00001166	WBGene00001920	WBGene00001155	WBGene00001434
WBGene00001167	WBGene00001921	WBGene00001160	WBGene00001439
WBGene00001168	WBGene00001922	WBGene00001161	WBGene00001443
WBGene00001169	WBGene00001923	WBGene00001163	WBGene00001466
WBGene00001171	WBGene00001925	WBGene00001166	WBGene00001470
WBGene00001172	WBGene00001926	WBGene00001167	WBGene00001475
WBGene00001173	WBGene00001927	WBGene00001168	WBGene00001476
WBGene00001177	WBGene00001928	WBGene00001169	WBGene00001477
WBGene00001178	WBGene00001929	WBGene00001171	WBGene00001478
WBGene00001179	WBGene00001930	WBGene00001172	WBGene00001479
WBGene00001182	WBGene00001931	WBGene00001173	WBGene00001480
WBGene00001184	WBGene00001932	WBGene00001177	WBGene00001483
WBGene00001186	WBGene00001933	WBGene00001179	WBGene00001484
WBGene00001187	WBGene00001934	WBGene00001184	WBGene00001485
WBGene00001188	WBGene00001935	WBGene00001187	WBGene00001486
WBGene00001189	WBGene00001936	WBGene00001188	WBGene00001487
WBGene00001190	WBGene00001937	WBGene00001189	WBGene00001488
WBGene00001194	WBGene00001938	WBGene00001194	WBGene00001489
WBGene00001196	WBGene00001939	WBGene00001196	WBGene00001491
WBGene00001202	WBGene00001940	WBGene00001202	WBGene00001492
WBGene00001204	WBGene00001941	WBGene00001207	WBGene00001493
WBGene00001207	WBGene00001942	WBGene00001208	WBGene00001496
WBGene00001208	WBGene00001945	WBGene00001209	WBGene00001497
WBGene00001209	WBGene00001946	WBGene00001215	WBGene00001498
WBGene00001210	WBGene00001972	WBGene00001224	WBGene00001499
WBGene00001215	WBGene00001973	WBGene00001225	WBGene00001500
WBGene00001224	WBGene00001974	WBGene00001226	WBGene00001501
WBGene00001225	WBGene00001978	WBGene00001227	WBGene00001502
WBGene00001226	WBGene00001979	WBGene00001228	WBGene00001503
WBGene00001227	WBGene00001983	WBGene00001229	WBGene00001505
WBGene00001228	WBGene00001993	WBGene00001230	WBGene00001507
WBGene00001229	WBGene00002001	WBGene00001231	WBGene00001508
WBGene00001230	WBGene00002003	WBGene00001232	WBGene00001509
WBGene00001231	WBGene00002005	WBGene00001233	WBGene00001510
WBGene00001232	WBGene00002007	WBGene00001234	WBGene00001512
WBGene00001233	WBGene00002008	WBGene00001235	WBGene00001513
WBGene00001234	WBGene00002010	WBGene00001236	WBGene00001515
WBGene00001235	WBGene00002025	WBGene00001241	WBGene00001516
WBGene00001236	WBGene00002028	WBGene00001248	WBGene00001519
WBGene00001237	WBGene00002031	WBGene00001249	WBGene00001520
WBGene00001241	WBGene00002035	WBGene00001258	WBGene00001522
WBGene00001242	WBGene00002036	WBGene00001259	WBGene00001523
WBGene00001247	WBGene00002038	WBGene00001262	WBGene00001526
WBGene00001248	WBGene00002039	WBGene00001263	WBGene00001527
WBGene00001249	WBGene00002041	WBGene00001281	WBGene00001538
WBGene00001250	WBGene00002042	WBGene00001303	WBGene00001551
WBGene00001252	WBGene00002043	WBGene00001320	WBGene00001552
WBGene00001253	WBGene00002044	WBGene00001324	WBGene00001553
WBGene00001258	WBGene00002045	WBGene00001328	WBGene00001554
WBGene00001259	WBGene00002050	WBGene00001329	WBGene00001555
WBGene00001262	WBGene00002051	WBGene00001330	WBGene00001556
WBGene00001263	WBGene00002052	WBGene00001331	WBGene00001558
WBGene00001281	WBGene00002053	WBGene00001333	WBGene00001559
WBGene00001303	WBGene00002054	WBGene00001334	WBGene00001560
WBGene00001320	WBGene00002055	WBGene00001335	WBGene00001568
WBGene00001328	WBGene00002056	WBGene00001336	WBGene00001574
WBGene00001329	WBGene00002057	WBGene00001337	WBGene00001577
WBGene00001330	WBGene00002058	WBGene00001338	WBGene00001578
WBGene00001331	WBGene00002061	WBGene00001340	WBGene00001579
WBGene00001332	WBGene00002062	WBGene00001352	WBGene00001580
WBGene00001333	WBGene00002064	WBGene00001358	WBGene00001582
WBGene00001334	WBGene00002065	WBGene00001365	WBGene00001585
WBGene00001335	WBGene00002067	WBGene00001366	WBGene00001590
WBGene00001336	WBGene00002070	WBGene00001368	WBGene00001591
WBGene00001337	WBGene00002071	WBGene00001371	WBGene00001592
WBGene00001338	WBGene00002074	WBGene00001372	WBGene00001593
WBGene00001340	WBGene00002075	WBGene00001374	WBGene00001596
WBGene00001352	WBGene00002076	WBGene00001377	WBGene00001604
WBGene00001358	WBGene00002077	WBGene00001395	WBGene00001609
WBGene00001365	WBGene00002078	WBGene00001396	WBGene00001612
WBGene00001366	WBGene00002080	WBGene00001397	WBGene00001613
WBGene00001368	WBGene00002081	WBGene00001398	WBGene00001614
WBGene00001371	WBGene00002083	WBGene00001399	WBGene00001615
WBGene00001372	WBGene00002146	WBGene00001403	WBGene00001616
WBGene00001373	WBGene00002147	WBGene00001404	WBGene00001620
WBGene00001377	WBGene00002149	WBGene00001405	WBGene00001622
WBGene00001395	WBGene00002150	WBGene00001406	WBGene00001623
WBGene00001396	WBGene00002152	WBGene00001410	WBGene00001624
WBGene00001397	WBGene00002153	WBGene00001411	WBGene00001626
WBGene00001398	WBGene00002162	WBGene00001412	WBGene00001627
WBGene00001399	WBGene00002169	WBGene00001414	WBGene00001628
WBGene00001401	WBGene00002173	WBGene00001425	WBGene00001629
WBGene00001402	WBGene00002178	WBGene00001426	WBGene00001630
WBGene00001403	WBGene00002181	WBGene00001427	WBGene00001632
WBGene00001404	WBGene00002182	WBGene00001431	WBGene00001635
WBGene00001405	WBGene00002183	WBGene00001432	WBGene00001636
WBGene00001406	WBGene00002184	WBGene00001434	WBGene00001638
WBGene00001410	WBGene00002185	WBGene00001438	WBGene00001639
WBGene00001411	WBGene00002189	WBGene00001443	WBGene00001640
WBGene00001412	WBGene00002190	WBGene00001470	WBGene00001641
WBGene00001414	WBGene00002191	WBGene00001475	WBGene00001642
WBGene00001423	WBGene00002195	WBGene00001476	WBGene00001643
WBGene00001424	WBGene00002196	WBGene00001477	WBGene00001644
WBGene00001425	WBGene00002198	WBGene00001478	WBGene00001645
WBGene00001426	WBGene00002201	WBGene00001480	WBGene00001646
WBGene00001427	WBGene00002202	WBGene00001483	WBGene00001647
WBGene00001428	WBGene00002203	WBGene00001485	WBGene00001648
WBGene00001429	WBGene00002213	WBGene00001489	WBGene00001650
WBGene00001430	WBGene00002215	WBGene00001490	WBGene00001651
WBGene00001431	WBGene00002217	WBGene00001492	WBGene00001660
WBGene00001432	WBGene00002218	WBGene00001496	WBGene00001661
WBGene00001433	WBGene00002219	WBGene00001497	WBGene00001662
WBGene00001434	WBGene00002222	WBGene00001498	WBGene00001666
WBGene00001438	WBGene00002223	WBGene00001499	WBGene00001669
WBGene00001439	WBGene00002224	WBGene00001500	WBGene00001674
WBGene00001440	WBGene00002229	WBGene00001501	WBGene00001678
WBGene00001441	WBGene00002230	WBGene00001502	WBGene00001679
WBGene00001443	WBGene00002232	WBGene00001503	WBGene00001680
WBGene00001465	WBGene00002233	WBGene00001505	WBGene00001681
WBGene00001470	WBGene00002235	WBGene00001507	WBGene00001682
WBGene00001475	WBGene00002238	WBGene00001508	WBGene00001683
WBGene00001476	WBGene00002243	WBGene00001509	WBGene00001684
WBGene00001477	WBGene00002244	WBGene00001510	WBGene00001685
WBGene00001478	WBGene00002245	WBGene00001512	WBGene00001686
WBGene00001479	WBGene00002247	WBGene00001515	WBGene00001687
WBGene00001480	WBGene00002248	WBGene00001516	WBGene00001707
WBGene00001481	WBGene00002249	WBGene00001519	WBGene00001708
WBGene00001484	WBGene00002251	WBGene00001520	WBGene00001709
WBGene00001485	WBGene00002257	WBGene00001522	WBGene00001740
WBGene00001486	WBGene00002258	WBGene00001523	WBGene00001743
WBGene00001487	WBGene00002259	WBGene00001526	WBGene00001744
WBGene00001488	WBGene00002260	WBGene00001527	WBGene00001745
WBGene00001489	WBGene00002261	WBGene00001558	WBGene00001746
WBGene00001490	WBGene00002262	WBGene00001559	WBGene00001747
WBGene00001491	WBGene00002278	WBGene00001577	WBGene00001748
WBGene00001492	WBGene00002280	WBGene00001579	WBGene00001749
WBGene00001493	WBGene00002324	WBGene00001580	WBGene00001752
WBGene00001494	WBGene00002335	WBGene00001582	WBGene00001753
WBGene00001496	WBGene00002344	WBGene00001583	WBGene00001756
WBGene00001497	WBGene00002348	WBGene00001585	WBGene00001759
WBGene00001499	WBGene00002363	WBGene00001590	WBGene00001764
WBGene00001500	WBGene00002497	WBGene00001604	WBGene00001767
WBGene00001501	WBGene00002632	WBGene00001612	WBGene00001769
WBGene00001502	WBGene00002637	WBGene00001613	WBGene00001771
WBGene00001503	WBGene00002694	WBGene00001620	WBGene00001776
WBGene00001505	WBGene00002845	WBGene00001626	WBGene00001777
WBGene00001507	WBGene00002855	WBGene00001627	WBGene00001780
WBGene00001508	WBGene00002879	WBGene00001628	WBGene00001786
WBGene00001509	WBGene00002889	WBGene00001629	WBGene00001790
WBGene00001510	WBGene00002891	WBGene00001632	WBGene00001791
WBGene00001511	WBGene00002978	WBGene00001635	WBGene00001792
WBGene00001512	WBGene00002980	WBGene00001636	WBGene00001793
WBGene00001513	WBGene00002981	WBGene00001638	WBGene00001794
WBGene00001515	WBGene00002985	WBGene00001639	WBGene00001795
WBGene00001516	WBGene00002988	WBGene00001640	WBGene00001796
WBGene00001517	WBGene00002989	WBGene00001641	WBGene00001808
WBGene00001518	WBGene00002991	WBGene00001642	WBGene00001811
WBGene00001519	WBGene00002996	WBGene00001643	WBGene00001812
WBGene00001520	WBGene00002998	WBGene00001644	WBGene00001813
WBGene00001522	WBGene00003007	WBGene00001645	WBGene00001814
WBGene00001523	WBGene00003009	WBGene00001646	WBGene00001815
WBGene00001526	WBGene00003020	WBGene00001648	WBGene00001816
WBGene00001527	WBGene00003025	WBGene00001650	WBGene00001817
WBGene00001538	WBGene00003026	WBGene00001651	WBGene00001818
WBGene00001558	WBGene00003030	WBGene00001660	WBGene00001819
WBGene00001559	WBGene00003036	WBGene00001661	WBGene00001823
WBGene00001560	WBGene00003041	WBGene00001662	WBGene00001827
WBGene00001565	WBGene00003047	WBGene00001674	WBGene00001829
WBGene00001568	WBGene00003048	WBGene00001679	WBGene00001830
WBGene00001574	WBGene00003052	WBGene00001680	WBGene00001833
WBGene00001577	WBGene00003059	WBGene00001681	WBGene00001834
WBGene00001579	WBGene00003061	WBGene00001682	WBGene00001836
WBGene00001580	WBGene00003063	WBGene00001683	WBGene00001837
WBGene00001582	WBGene00003064	WBGene00001684	WBGene00001840
WBGene00001585	WBGene00003071	WBGene00001685	WBGene00001843
WBGene00001586	WBGene00003073	WBGene00001686	WBGene00001844
WBGene00001587	WBGene00003074	WBGene00001687	WBGene00001851
WBGene00001588	WBGene00003076	WBGene00001707	WBGene00001853
WBGene00001590	WBGene00003077	WBGene00001708	WBGene00001854
WBGene00001591	WBGene00003079	WBGene00001709	WBGene00001855
WBGene00001592	WBGene00003080	WBGene00001740	WBGene00001856
WBGene00001593	WBGene00003081	WBGene00001743	WBGene00001857
WBGene00001594	WBGene00003082	WBGene00001744	WBGene00001860
WBGene00001595	WBGene00003086	WBGene00001745	WBGene00001862
WBGene00001596	WBGene00003112	WBGene00001746	WBGene00001863
WBGene00001602	WBGene00003119	WBGene00001747	WBGene00001865
WBGene00001603	WBGene00003123	WBGene00001748	WBGene00001872
WBGene00001604	WBGene00003129	WBGene00001749	WBGene00001875
WBGene00001606	WBGene00003136	WBGene00001758	WBGene00001876
WBGene00001607	WBGene00003143	WBGene00001759	WBGene00001877
WBGene00001609	WBGene00003148	WBGene00001771	WBGene00001878
WBGene00001612	WBGene00003150	WBGene00001773	WBGene00001879
WBGene00001613	WBGene00003153	WBGene00001790	WBGene00001880
WBGene00001614	WBGene00003154	WBGene00001791	WBGene00001881
WBGene00001615	WBGene00003156	WBGene00001792	WBGene00001882
WBGene00001616	WBGene00003157	WBGene00001793	WBGene00001883
WBGene00001617	WBGene00003159	WBGene00001794	WBGene00001884
WBGene00001618	WBGene00003161	WBGene00001808	WBGene00001885
WBGene00001619	WBGene00003162	WBGene00001811	WBGene00001886
WBGene00001620	WBGene00003164	WBGene00001813	WBGene00001887
WBGene00001621	WBGene00003168	WBGene00001814	WBGene00001888
WBGene00001622	WBGene00003171	WBGene00001815	WBGene00001889
WBGene00001623	WBGene00003174	WBGene00001816	WBGene00001890
WBGene00001624	WBGene00003175	WBGene00001819	WBGene00001891
WBGene00001625	WBGene00003177	WBGene00001823	WBGene00001892
WBGene00001626	WBGene00003185	WBGene00001824	WBGene00001893
WBGene00001627	WBGene00003186	WBGene00001827	WBGene00001894
WBGene00001628	WBGene00003214	WBGene00001829	WBGene00001895
WBGene00001629	WBGene00003232	WBGene00001830	WBGene00001896
WBGene00001630	WBGene00003246	WBGene00001834	WBGene00001898
WBGene00001632	WBGene00003253	WBGene00001837	WBGene00001899
WBGene00001633	WBGene00003254	WBGene00001840	WBGene00001900
WBGene00001635	WBGene00003369	WBGene00001843	WBGene00001901
WBGene00001636	WBGene00003370	WBGene00001844	WBGene00001902
WBGene00001637	WBGene00003372	WBGene00001853	WBGene00001903
WBGene00001638	WBGene00003375	WBGene00001854	WBGene00001904
WBGene00001639	WBGene00003376	WBGene00001855	WBGene00001905
WBGene00001640	WBGene00003389	WBGene00001856	WBGene00001906
WBGene00001641	WBGene00003390	WBGene00001857	WBGene00001907
WBGene00001642	WBGene00003392	WBGene00001860	WBGene00001908
WBGene00001643	WBGene00003393	WBGene00001862	WBGene00001909
WBGene00001644	WBGene00003400	WBGene00001863	WBGene00001911
WBGene00001645	WBGene00003401	WBGene00001872	WBGene00001912
WBGene00001646	WBGene00003405	WBGene00001875	WBGene00001915
WBGene00001647	WBGene00003406	WBGene00001876	WBGene00001916
WBGene00001648	WBGene00003407	WBGene00001877	WBGene00001917
WBGene00001650	WBGene00003408	WBGene00001878	WBGene00001918
WBGene00001651	WBGene00003409	WBGene00001879	WBGene00001919
WBGene00001660	WBGene00003410	WBGene00001880	WBGene00001920
WBGene00001661	WBGene00003411	WBGene00001881	WBGene00001921
WBGene00001662	WBGene00003412	WBGene00001882	WBGene00001922
WBGene00001666	WBGene00003413	WBGene00001883	WBGene00001923
WBGene00001674	WBGene00003417	WBGene00001884	WBGene00001924
WBGene00001678	WBGene00003421	WBGene00001885	WBGene00001925
WBGene00001679	WBGene00003422	WBGene00001886	WBGene00001926
WBGene00001680	WBGene00003475	WBGene00001887	WBGene00001927
WBGene00001682	WBGene00003477	WBGene00001888	WBGene00001928
WBGene00001683	WBGene00003478	WBGene00001889	WBGene00001929
WBGene00001684	WBGene00003479	WBGene00001890	WBGene00001930
WBGene00001685	WBGene00003485	WBGene00001891	WBGene00001931
WBGene00001686	WBGene00003504	WBGene00001892	WBGene00001932
WBGene00001687	WBGene00003514	WBGene00001893	WBGene00001933
WBGene00001707	WBGene00003515	WBGene00001894	WBGene00001934
WBGene00001708	WBGene00003517	WBGene00001895	WBGene00001935
WBGene00001709	WBGene00003518	WBGene00001896	WBGene00001936
WBGene00001740	WBGene00003519	WBGene00001898	WBGene00001937
WBGene00001743	WBGene00003555	WBGene00001899	WBGene00001938
WBGene00001744	WBGene00003558	WBGene00001900	WBGene00001939
WBGene00001745	WBGene00003563	WBGene00001901	WBGene00001940
WBGene00001746	WBGene00003566	WBGene00001902	WBGene00001941
WBGene00001747	WBGene00003567	WBGene00001903	WBGene00001942
WBGene00001748	WBGene00003569	WBGene00001904	WBGene00001943
WBGene00001749	WBGene00003570	WBGene00001905	WBGene00001945
WBGene00001750	WBGene00003571	WBGene00001906	WBGene00001946
WBGene00001751	WBGene00003572	WBGene00001907	WBGene00001948
WBGene00001752	WBGene00003573	WBGene00001908	WBGene00001949
WBGene00001753	WBGene00003574	WBGene00001909	WBGene00001950
WBGene00001754	WBGene00003575	WBGene00001911	WBGene00001952
WBGene00001755	WBGene00003579	WBGene00001912	WBGene00001953
WBGene00001756	WBGene00003580	WBGene00001914	WBGene00001955
WBGene00001757	WBGene00003581	WBGene00001915	WBGene00001958
WBGene00001759	WBGene00003583	WBGene00001916	WBGene00001959
WBGene00001760	WBGene00003584	WBGene00001917	WBGene00001961
WBGene00001761	WBGene00003586	WBGene00001918	WBGene00001972
WBGene00001762	WBGene00003587	WBGene00001919	WBGene00001973
WBGene00001763	WBGene00003588	WBGene00001920	WBGene00001974
WBGene00001764	WBGene00003589	WBGene00001921	WBGene00001975
WBGene00001765	WBGene00003596	WBGene00001922	WBGene00001978
WBGene00001766	WBGene00003622	WBGene00001923	WBGene00001979
WBGene00001767	WBGene00003654	WBGene00001924	WBGene00001980
WBGene00001768	WBGene00003657	WBGene00001925	WBGene00001983
WBGene00001769	WBGene00003733	WBGene00001926	WBGene00001993
WBGene00001770	WBGene00003735	WBGene00001927	WBGene00001994
WBGene00001771	WBGene00003772	WBGene00001928	WBGene00001995
WBGene00001772	WBGene00003774	WBGene00001929	WBGene00001996
WBGene00001773	WBGene00003775	WBGene00001930	WBGene00001997
WBGene00001774	WBGene00003776	WBGene00001931	WBGene00001998
WBGene00001775	WBGene00003778	WBGene00001932	WBGene00001999
WBGene00001776	WBGene00003788	WBGene00001933	WBGene00002000
WBGene00001777	WBGene00003794	WBGene00001934	WBGene00002001
WBGene00001778	WBGene00003798	WBGene00001935	WBGene00002002
WBGene00001779	WBGene00003799	WBGene00001936	WBGene00002003
WBGene00001780	WBGene00003803	WBGene00001937	WBGene00002004
WBGene00001781	WBGene00003804	WBGene00001938	WBGene00002005
WBGene00001782	WBGene00003806	WBGene00001939	WBGene00002007
WBGene00001783	WBGene00003807	WBGene00001940	WBGene00002008
WBGene00001784	WBGene00003808	WBGene00001941	WBGene00002010
WBGene00001785	WBGene00003815	WBGene00001942	WBGene00002011
WBGene00001786	WBGene00003816	WBGene00001945	WBGene00002015
WBGene00001787	WBGene00003818	WBGene00001950	WBGene00002016
WBGene00001788	WBGene00003825	WBGene00001952	WBGene00002017
WBGene00001789	WBGene00003828	WBGene00001953	WBGene00002025
WBGene00001790	WBGene00003829	WBGene00001954	WBGene00002026
WBGene00001791	WBGene00003831	WBGene00001955	WBGene00002028
WBGene00001792	WBGene00003834	WBGene00001959	WBGene00002029
WBGene00001793	WBGene00003835	WBGene00001972	WBGene00002031
WBGene00001794	WBGene00003844	WBGene00001973	WBGene00002035
WBGene00001795	WBGene00003858	WBGene00001974	WBGene00002036
WBGene00001796	WBGene00003870	WBGene00001975	WBGene00002038
WBGene00001808	WBGene00003876	WBGene00001978	WBGene00002039
WBGene00001812	WBGene00003877	WBGene00001979	WBGene00002040
WBGene00001814	WBGene00003878	WBGene00001983	WBGene00002041
WBGene00001815	WBGene00003883	WBGene00001993	WBGene00002042
WBGene00001816	WBGene00003884	WBGene00001995	WBGene00002043
WBGene00001817	WBGene00003885	WBGene00001997	WBGene00002044
WBGene00001818	WBGene00003886	WBGene00001998	WBGene00002045
WBGene00001819	WBGene00003892	WBGene00001999	WBGene00002046
WBGene00001820	WBGene00003893	WBGene00002000	WBGene00002047
WBGene00001823	WBGene00003898	WBGene00002001	WBGene00002048
WBGene00001824	WBGene00003901	WBGene00002002	WBGene00002050
WBGene00001827	WBGene00003902	WBGene00002003	WBGene00002051
WBGene00001828	WBGene00003903	WBGene00002004	WBGene00002052
WBGene00001831	WBGene00003904	WBGene00002005	WBGene00002061
WBGene00001833	WBGene00003906	WBGene00002007	WBGene00002062
WBGene00001834	WBGene00003907	WBGene00002008	WBGene00002064
WBGene00001835	WBGene00003911	WBGene00002010	WBGene00002065
WBGene00001836	WBGene00003914	WBGene00002011	WBGene00002066
WBGene00001837	WBGene00003916	WBGene00002012	WBGene00002069
WBGene00001838	WBGene00003919	WBGene00002013	WBGene00002070
WBGene00001840	WBGene00003920	WBGene00002023	WBGene00002071
WBGene00001843	WBGene00003921	WBGene00002025	WBGene00002074
WBGene00001844	WBGene00003922	WBGene00002027	WBGene00002075
WBGene00001851	WBGene00003923	WBGene00002028	WBGene00002076
WBGene00001860	WBGene00003924	WBGene00002029	WBGene00002077
WBGene00001863	WBGene00003925	WBGene00002030	WBGene00002078
WBGene00001865	WBGene00003926	WBGene00002031	WBGene00002079
WBGene00001872	WBGene00003927	WBGene00002032	WBGene00002080
WBGene00001875	WBGene00003928	WBGene00002033	WBGene00002081
WBGene00001876	WBGene00003929	WBGene00002035	WBGene00002083
WBGene00001877	WBGene00003930	WBGene00002036	WBGene00002146
WBGene00001878	WBGene00003931	WBGene00002038	WBGene00002147
WBGene00001879	WBGene00003932	WBGene00002039	WBGene00002149
WBGene00001880	WBGene00003941	WBGene00002040	WBGene00002150
WBGene00001881	WBGene00003949	WBGene00002041	WBGene00002152
WBGene00001882	WBGene00003950	WBGene00002042	WBGene00002153
WBGene00001883	WBGene00003951	WBGene00002043	WBGene00002162
WBGene00001884	WBGene00003952	WBGene00002044	WBGene00002169
WBGene00001885	WBGene00003954	WBGene00002045	WBGene00002173
WBGene00001886	WBGene00003955	WBGene00002046	WBGene00002175
WBGene00001887	WBGene00003961	WBGene00002047	WBGene00002176
WBGene00001888	WBGene00003963	WBGene00002048	WBGene00002178
WBGene00001889	WBGene00003964	WBGene00002050	WBGene00002179
WBGene00001890	WBGene00003965	WBGene00002051	WBGene00002180
WBGene00001891	WBGene00003966	WBGene00002052	WBGene00002181
WBGene00001892	WBGene00003967	WBGene00002053	WBGene00002182
WBGene00001893	WBGene00003969	WBGene00002054	WBGene00002183
WBGene00001894	WBGene00003975	WBGene00002061	WBGene00002184
WBGene00001895	WBGene00003980	WBGene00002062	WBGene00002185
WBGene00001896	WBGene00003986	WBGene00002064	WBGene00002189
WBGene00001899	WBGene00003995	WBGene00002065	WBGene00002190
WBGene00001900	WBGene00004003	WBGene00002066	WBGene00002191
WBGene00001901	WBGene00004014	WBGene00002069	WBGene00002192
WBGene00001902	WBGene00004015	WBGene00002070	WBGene00002196
WBGene00001903	WBGene00004016	WBGene00002071	WBGene00002198
WBGene00001904	WBGene00004025	WBGene00002074	WBGene00002201
WBGene00001905	WBGene00004028	WBGene00002075	WBGene00002202
WBGene00001906	WBGene00004032	WBGene00002076	WBGene00002203
WBGene00001907	WBGene00004033	WBGene00002077	WBGene00002207
WBGene00001908	WBGene00004034	WBGene00002078	WBGene00002213
WBGene00001909	WBGene00004035	WBGene00002079	WBGene00002215
WBGene00001911	WBGene00004036	WBGene00002080	WBGene00002216
WBGene00001912	WBGene00004038	WBGene00002081	WBGene00002217
WBGene00001913	WBGene00004039	WBGene00002083	WBGene00002218
WBGene00001914	WBGene00004040	WBGene00002146	WBGene00002219
WBGene00001915	WBGene00004042	WBGene00002147	WBGene00002222
WBGene00001916	WBGene00004043	WBGene00002150	WBGene00002223
WBGene00001917	WBGene00004045	WBGene00002152	WBGene00002227
WBGene00001918	WBGene00004047	WBGene00002153	WBGene00002228
WBGene00001919	WBGene00004049	WBGene00002162	WBGene00002229
WBGene00001920	WBGene00004055	WBGene00002169	WBGene00002230
WBGene00001921	WBGene00004058	WBGene00002173	WBGene00002232
WBGene00001922	WBGene00004059	WBGene00002175	WBGene00002233
WBGene00001923	WBGene00004060	WBGene00002178	WBGene00002235
WBGene00001924	WBGene00004063	WBGene00002179	WBGene00002238
WBGene00001925	WBGene00004064	WBGene00002180	WBGene00002239
WBGene00001926	WBGene00004075	WBGene00002181	WBGene00002243
WBGene00001927	WBGene00004085	WBGene00002182	WBGene00002244
WBGene00001928	WBGene00004087	WBGene00002183	WBGene00002245
WBGene00001929	WBGene00004088	WBGene00002184	WBGene00002247
WBGene00001930	WBGene00004090	WBGene00002185	WBGene00002248
WBGene00001931	WBGene00004091	WBGene00002189	WBGene00002249
WBGene00001932	WBGene00004092	WBGene00002190	WBGene00002251
WBGene00001933	WBGene00004101	WBGene00002191	WBGene00002252
WBGene00001934	WBGene00004109	WBGene00002192	WBGene00002257
WBGene00001935	WBGene00004131	WBGene00002196	WBGene00002258
WBGene00001936	WBGene00004134	WBGene00002201	WBGene00002261
WBGene00001937	WBGene00004151	WBGene00002202	WBGene00002262
WBGene00001938	WBGene00004178	WBGene00002203	WBGene00002264
WBGene00001939	WBGene00004179	WBGene00002207	WBGene00002276
WBGene00001940	WBGene00004180	WBGene00002213	WBGene00002278
WBGene00001941	WBGene00004181	WBGene00002215	WBGene00002280
WBGene00001942	WBGene00004183	WBGene00002216	WBGene00002295
WBGene00001943	WBGene00004184	WBGene00002217	WBGene00002297
WBGene00001944	WBGene00004185	WBGene00002219	WBGene00002299
WBGene00001945	WBGene00004187	WBGene00002222	WBGene00002324
WBGene00001948	WBGene00004188	WBGene00002223	WBGene00002335
WBGene00001949	WBGene00004190	WBGene00002224	WBGene00002344
WBGene00001952	WBGene00004194	WBGene00002225	WBGene00002348
WBGene00001953	WBGene00004197	WBGene00002226	WBGene00002363
WBGene00001955	WBGene00004198	WBGene00002227	WBGene00002497
WBGene00001957	WBGene00004204	WBGene00002228	WBGene00002583
WBGene00001959	WBGene00004205	WBGene00002229	WBGene00002601
WBGene00001960	WBGene00004206	WBGene00002230	WBGene00002632
WBGene00001961	WBGene00004207	WBGene00002232	WBGene00002637
WBGene00001971	WBGene00004208	WBGene00002233	WBGene00002694
WBGene00001972	WBGene00004209	WBGene00002235	WBGene00002696
WBGene00001973	WBGene00004210	WBGene00002238	WBGene00002717
WBGene00001974	WBGene00004211	WBGene00002239	WBGene00002804
WBGene00001978	WBGene00004213	WBGene00002242	WBGene00002845
WBGene00001979	WBGene00004215	WBGene00002243	WBGene00002850
WBGene00001983	WBGene00004233	WBGene00002244	WBGene00002855
WBGene00001985	WBGene00004248	WBGene00002245	WBGene00002879
WBGene00001993	WBGene00004254	WBGene00002247	WBGene00002889
WBGene00001994	WBGene00004255	WBGene00002248	WBGene00002891
WBGene00001995	WBGene00004256	WBGene00002249	WBGene00002957
WBGene00001997	WBGene00004257	WBGene00002251	WBGene00002978
WBGene00001998	WBGene00004258	WBGene00002252	WBGene00002979
WBGene00001999	WBGene00004259	WBGene00002257	WBGene00002980
WBGene00002000	WBGene00004266	WBGene00002258	WBGene00002981
WBGene00002001	WBGene00004267	WBGene00002259	WBGene00002982
WBGene00002002	WBGene00004268	WBGene00002260	WBGene00002985
WBGene00002003	WBGene00004269	WBGene00002261	WBGene00002986
WBGene00002004	WBGene00004272	WBGene00002262	WBGene00002987
WBGene00002005	WBGene00004273	WBGene00002263	WBGene00002988
WBGene00002007	WBGene00004274	WBGene00002264	WBGene00002989
WBGene00002008	WBGene00004277	WBGene00002266	WBGene00002990
WBGene00002010	WBGene00004278	WBGene00002267	WBGene00002991
WBGene00002011	WBGene00004279	WBGene00002268	WBGene00002996
WBGene00002012	WBGene00004281	WBGene00002269	WBGene00002998
WBGene00002013	WBGene00004282	WBGene00002270	WBGene00002999
WBGene00002015	WBGene00004283	WBGene00002271	WBGene00003000
WBGene00002016	WBGene00004284	WBGene00002272	WBGene00003001
WBGene00002017	WBGene00004285	WBGene00002273	WBGene00003007
WBGene00002018	WBGene00004286	WBGene00002275	WBGene00003008
WBGene00002019	WBGene00004287	WBGene00002276	WBGene00003009
WBGene00002020	WBGene00004297	WBGene00002278	WBGene00003014
WBGene00002021	WBGene00004298	WBGene00002280	WBGene00003017
WBGene00002023	WBGene00004302	WBGene00002295	WBGene00003018
WBGene00002024	WBGene00004304	WBGene00002297	WBGene00003020
WBGene00002025	WBGene00004305	WBGene00002324	WBGene00003024
WBGene00002027	WBGene00004307	WBGene00002335	WBGene00003025
WBGene00002028	WBGene00004308	WBGene00002344	WBGene00003026
WBGene00002029	WBGene00004310	WBGene00002348	WBGene00003030
WBGene00002030	WBGene00004311	WBGene00002363	WBGene00003033
WBGene00002031	WBGene00004313	WBGene00002497	WBGene00003034
WBGene00002035	WBGene00004314	WBGene00002583	WBGene00003036
WBGene00002036	WBGene00004315	WBGene00002632	WBGene00003037
WBGene00002037	WBGene00004316	WBGene00002637	WBGene00003040
WBGene00002038	WBGene00004317	WBGene00002694	WBGene00003041
WBGene00002039	WBGene00004319	WBGene00002696	WBGene00003043
WBGene00002040	WBGene00004320	WBGene00002717	WBGene00003047
WBGene00002041	WBGene00004321	WBGene00002804	WBGene00003048
WBGene00002042	WBGene00004322	WBGene00002845	WBGene00003052
WBGene00002043	WBGene00004338	WBGene00002850	WBGene00003058
WBGene00002044	WBGene00004339	WBGene00002855	WBGene00003059
WBGene00002045	WBGene00004341	WBGene00002879	WBGene00003060
WBGene00002046	WBGene00004344	WBGene00002889	WBGene00003061
WBGene00002047	WBGene00004345	WBGene00002891	WBGene00003062
WBGene00002048	WBGene00004355	WBGene00002957	WBGene00003063
WBGene00002050	WBGene00004356	WBGene00002976	WBGene00003064
WBGene00002051	WBGene00004357	WBGene00002978	WBGene00003066
WBGene00002052	WBGene00004358	WBGene00002979	WBGene00003068
WBGene00002053	WBGene00004359	WBGene00002980	WBGene00003071
WBGene00002054	WBGene00004360	WBGene00002981	WBGene00003072
WBGene00002059	WBGene00004371	WBGene00002982	WBGene00003073
WBGene00002060	WBGene00004373	WBGene00002985	WBGene00003074
WBGene00002061	WBGene00004378	WBGene00002986	WBGene00003076
WBGene00002062	WBGene00004381	WBGene00002987	WBGene00003077
WBGene00002063	WBGene00004382	WBGene00002988	WBGene00003078
WBGene00002066	WBGene00004383	WBGene00002989	WBGene00003079
WBGene00002069	WBGene00004385	WBGene00002990	WBGene00003080
WBGene00002070	WBGene00004386	WBGene00002991	WBGene00003081
WBGene00002071	WBGene00004387	WBGene00002996	WBGene00003082
WBGene00002072	WBGene00004389	WBGene00002998	WBGene00003084
WBGene00002073	WBGene00004391	WBGene00003000	WBGene00003085
WBGene00002074	WBGene00004392	WBGene00003007	WBGene00003086
WBGene00002075	WBGene00004400	WBGene00003009	WBGene00003089
WBGene00002076	WBGene00004402	WBGene00003014	WBGene00003102
WBGene00002077	WBGene00004403	WBGene00003017	WBGene00003106
WBGene00002078	WBGene00004405	WBGene00003018	WBGene00003107
WBGene00002079	WBGene00004408	WBGene00003020	WBGene00003112
WBGene00002080	WBGene00004411	WBGene00003024	WBGene00003119
WBGene00002081	WBGene00004412	WBGene00003025	WBGene00003123
WBGene00002083	WBGene00004413	WBGene00003026	WBGene00003129
WBGene00002146	WBGene00004414	WBGene00003030	WBGene00003130
WBGene00002147	WBGene00004415	WBGene00003033	WBGene00003132
WBGene00002149	WBGene00004416	WBGene00003035	WBGene00003133
WBGene00002150	WBGene00004417	WBGene00003036	WBGene00003134
WBGene00002151	WBGene00004418	WBGene00003041	WBGene00003136
WBGene00002152	WBGene00004420	WBGene00003043	WBGene00003142
WBGene00002153	WBGene00004421	WBGene00003047	WBGene00003143
WBGene00002162	WBGene00004422	WBGene00003048	WBGene00003144
WBGene00002169	WBGene00004423	WBGene00003052	WBGene00003148
WBGene00002173	WBGene00004424	WBGene00003057	WBGene00003149
WBGene00002174	WBGene00004425	WBGene00003059	WBGene00003150
WBGene00002175	WBGene00004426	WBGene00003060	WBGene00003151
WBGene00002176	WBGene00004428	WBGene00003061	WBGene00003153
WBGene00002177	WBGene00004429	WBGene00003062	WBGene00003154
WBGene00002178	WBGene00004430	WBGene00003063	WBGene00003155
WBGene00002179	WBGene00004431	WBGene00003064	WBGene00003156
WBGene00002181	WBGene00004433	WBGene00003066	WBGene00003157
WBGene00002182	WBGene00004434	WBGene00003068	WBGene00003158
WBGene00002183	WBGene00004435	WBGene00003071	WBGene00003159
WBGene00002184	WBGene00004436	WBGene00003073	WBGene00003161
WBGene00002185	WBGene00004437	WBGene00003074	WBGene00003162
WBGene00002186	WBGene00004440	WBGene00003076	WBGene00003163
WBGene00002189	WBGene00004441	WBGene00003077	WBGene00003164
WBGene00002190	WBGene00004444	WBGene00003078	WBGene00003165
WBGene00002191	WBGene00004445	WBGene00003079	WBGene00003166
WBGene00002192	WBGene00004446	WBGene00003080	WBGene00003171
WBGene00002193	WBGene00004447	WBGene00003081	WBGene00003172
WBGene00002194	WBGene00004449	WBGene00003082	WBGene00003175
WBGene00002195	WBGene00004451	WBGene00003084	WBGene00003178
WBGene00002196	WBGene00004452	WBGene00003085	WBGene00003182
WBGene00002198	WBGene00004454	WBGene00003086	WBGene00003183
WBGene00002199	WBGene00004456	WBGene00003089	WBGene00003185
WBGene00002200	WBGene00004457	WBGene00003102	WBGene00003186
WBGene00002201	WBGene00004458	WBGene00003107	WBGene00003196
WBGene00002202	WBGene00004460	WBGene00003112	WBGene00003214
WBGene00002203	WBGene00004461	WBGene00003119	WBGene00003220
WBGene00002204	WBGene00004462	WBGene00003123	WBGene00003222
WBGene00002205	WBGene00004463	WBGene00003124	WBGene00003224
WBGene00002206	WBGene00004464	WBGene00003129	WBGene00003225
WBGene00002207	WBGene00004465	WBGene00003130	WBGene00003229
WBGene00002208	WBGene00004466	WBGene00003132	WBGene00003232
WBGene00002210	WBGene00004467	WBGene00003134	WBGene00003233
WBGene00002211	WBGene00004468	WBGene00003136	WBGene00003234
WBGene00002213	WBGene00004469	WBGene00003142	WBGene00003235
WBGene00002214	WBGene00004470	WBGene00003143	WBGene00003239
WBGene00002215	WBGene00004471	WBGene00003148	WBGene00003242
WBGene00002216	WBGene00004472	WBGene00003149	WBGene00003243
WBGene00002217	WBGene00004473	WBGene00003150	WBGene00003246
WBGene00002219	WBGene00004474	WBGene00003153	WBGene00003247
WBGene00002222	WBGene00004475	WBGene00003154	WBGene00003253
WBGene00002223	WBGene00004476	WBGene00003155	WBGene00003254
WBGene00002224	WBGene00004477	WBGene00003156	WBGene00003367
WBGene00002225	WBGene00004478	WBGene00003157	WBGene00003368
WBGene00002226	WBGene00004479	WBGene00003158	WBGene00003372
WBGene00002227	WBGene00004480	WBGene00003159	WBGene00003373
WBGene00002228	WBGene00004481	WBGene00003160	WBGene00003374
WBGene00002229	WBGene00004482	WBGene00003161	WBGene00003375
WBGene00002230	WBGene00004483	WBGene00003162	WBGene00003376
WBGene00002232	WBGene00004485	WBGene00003164	WBGene00003377
WBGene00002233	WBGene00004486	WBGene00003168	WBGene00003378
WBGene00002234	WBGene00004487	WBGene00003172	WBGene00003384
WBGene00002235	WBGene00004489	WBGene00003174	WBGene00003387
WBGene00002238	WBGene00004490	WBGene00003175	WBGene00003389
WBGene00002239	WBGene00004491	WBGene00003177	WBGene00003390
WBGene00002240	WBGene00004492	WBGene00003182	WBGene00003391
WBGene00002243	WBGene00004493	WBGene00003183	WBGene00003392
WBGene00002245	WBGene00004494	WBGene00003185	WBGene00003393
WBGene00002247	WBGene00004495	WBGene00003186	WBGene00003394
WBGene00002248	WBGene00004496	WBGene00003196	WBGene00003396
WBGene00002249	WBGene00004497	WBGene00003210	WBGene00003397
WBGene00002250	WBGene00004499	WBGene00003214	WBGene00003400
WBGene00002251	WBGene00004501	WBGene00003218	WBGene00003401
WBGene00002252	WBGene00004502	WBGene00003220	WBGene00003404
WBGene00002257	WBGene00004503	WBGene00003224	WBGene00003405
WBGene00002258	WBGene00004504	WBGene00003225	WBGene00003406
WBGene00002259	WBGene00004505	WBGene00003232	WBGene00003407
WBGene00002260	WBGene00004506	WBGene00003233	WBGene00003408
WBGene00002261	WBGene00004507	WBGene00003234	WBGene00003409
WBGene00002262	WBGene00004679	WBGene00003235	WBGene00003410
WBGene00002264	WBGene00004700	WBGene00003242	WBGene00003411
WBGene00002265	WBGene00004719	WBGene00003243	WBGene00003412
WBGene00002266	WBGene00004727	WBGene00003246	WBGene00003413
WBGene00002267	WBGene00004728	WBGene00003247	WBGene00003414
WBGene00002268	WBGene00004729	WBGene00003253	WBGene00003415
WBGene00002275	WBGene00004736	WBGene00003254	WBGene00003417
WBGene00002276	WBGene00004738	WBGene00003258	WBGene00003418
WBGene00002278	WBGene00004743	WBGene00003367	WBGene00003421
WBGene00002280	WBGene00004744	WBGene00003368	WBGene00003422
WBGene00002282	WBGene00004752	WBGene00003372	WBGene00003423
WBGene00002295	WBGene00004753	WBGene00003373	WBGene00003472
WBGene00002297	WBGene00004754	WBGene00003374	WBGene00003475
WBGene00002299	WBGene00004755	WBGene00003375	WBGene00003476
WBGene00002324	WBGene00004756	WBGene00003376	WBGene00003477
WBGene00002335	WBGene00004758	WBGene00003377	WBGene00003478
WBGene00002348	WBGene00004759	WBGene00003378	WBGene00003479
WBGene00002363	WBGene00004760	WBGene00003384	WBGene00003480
WBGene00002497	WBGene00004766	WBGene00003387	WBGene00003482
WBGene00002601	WBGene00004768	WBGene00003388	WBGene00003485
WBGene00002632	WBGene00004769	WBGene00003389	WBGene00003495
WBGene00002637	WBGene00004774	WBGene00003391	WBGene00003497
WBGene00002694	WBGene00004776	WBGene00003392	WBGene00003504
WBGene00002696	WBGene00004779	WBGene00003393	WBGene00003510
WBGene00002717	WBGene00004780	WBGene00003394	WBGene00003511
WBGene00002783	WBGene00004781	WBGene00003396	WBGene00003514
WBGene00002804	WBGene00004787	WBGene00003397	WBGene00003515
WBGene00002845	WBGene00004788	WBGene00003400	WBGene00003516
WBGene00002850	WBGene00004789	WBGene00003401	WBGene00003517
WBGene00002855	WBGene00004790	WBGene00003404	WBGene00003519
WBGene00002879	WBGene00004801	WBGene00003405	WBGene00003532
WBGene00002881	WBGene00004802	WBGene00003406	WBGene00003555
WBGene00002889	WBGene00004806	WBGene00003407	WBGene00003558
WBGene00002891	WBGene00004807	WBGene00003408	WBGene00003559
WBGene00002915	WBGene00004808	WBGene00003411	WBGene00003561
WBGene00002957	WBGene00004830	WBGene00003415	WBGene00003563
WBGene00002974	WBGene00004831	WBGene00003417	WBGene00003566
WBGene00002975	WBGene00004854	WBGene00003418	WBGene00003567
WBGene00002976	WBGene00004855	WBGene00003421	WBGene00003568
WBGene00002978	WBGene00004856	WBGene00003422	WBGene00003569
WBGene00002979	WBGene00004860	WBGene00003423	WBGene00003570
WBGene00002980	WBGene00004873	WBGene00003472	WBGene00003571
WBGene00002981	WBGene00004875	WBGene00003475	WBGene00003572
WBGene00002982	WBGene00004876	WBGene00003476	WBGene00003573
WBGene00002985	WBGene00004877	WBGene00003477	WBGene00003574
WBGene00002986	WBGene00004878	WBGene00003478	WBGene00003575
WBGene00002987	WBGene00004880	WBGene00003479	WBGene00003576
WBGene00002988	WBGene00004888	WBGene00003480	WBGene00003578
WBGene00002989	WBGene00004892	WBGene00003485	WBGene00003579
WBGene00002991	WBGene00004895	WBGene00003504	WBGene00003580
WBGene00002996	WBGene00004897	WBGene00003509	WBGene00003581
WBGene00002998	WBGene00004910	WBGene00003510	WBGene00003582
WBGene00002999	WBGene00004912	WBGene00003514	WBGene00003583
WBGene00003000	WBGene00004913	WBGene00003515	WBGene00003584
WBGene00003001	WBGene00004914	WBGene00003516	WBGene00003585
WBGene00003006	WBGene00004915	WBGene00003517	WBGene00003586
WBGene00003007	WBGene00004916	WBGene00003519	WBGene00003587
WBGene00003009	WBGene00004917	WBGene00003523	WBGene00003589
WBGene00003014	WBGene00004920	WBGene00003526	WBGene00003592
WBGene00003015	WBGene00004921	WBGene00003527	WBGene00003594
WBGene00003017	WBGene00004927	WBGene00003532	WBGene00003595
WBGene00003018	WBGene00004929	WBGene00003555	WBGene00003596
WBGene00003020	WBGene00004930	WBGene00003558	WBGene00003597
WBGene00003024	WBGene00004931	WBGene00003561	WBGene00003605
WBGene00003025	WBGene00004932	WBGene00003563	WBGene00003622
WBGene00003026	WBGene00004947	WBGene00003567	WBGene00003623
WBGene00003029	WBGene00004951	WBGene00003569	WBGene00003639
WBGene00003030	WBGene00004959	WBGene00003572	WBGene00003654
WBGene00003033	WBGene00004969	WBGene00003573	WBGene00003657
WBGene00003034	WBGene00004978	WBGene00003574	WBGene00003659
WBGene00003036	WBGene00004980	WBGene00003575	WBGene00003681
WBGene00003037	WBGene00005007	WBGene00003576	WBGene00003729
WBGene00003040	WBGene00005010	WBGene00003579	WBGene00003730
WBGene00003041	WBGene00005014	WBGene00003580	WBGene00003731
WBGene00003043	WBGene00005015	WBGene00003583	WBGene00003733
WBGene00003047	WBGene00005019	WBGene00003584	WBGene00003734
WBGene00003048	WBGene00005020	WBGene00003585	WBGene00003735
WBGene00003052	WBGene00005021	WBGene00003586	WBGene00003736
WBGene00003055	WBGene00005022	WBGene00003587	WBGene00003738
WBGene00003058	WBGene00005023	WBGene00003589	WBGene00003772
WBGene00003059	WBGene00005025	WBGene00003594	WBGene00003774
WBGene00003060	WBGene00005026	WBGene00003596	WBGene00003775
WBGene00003061	WBGene00005077	WBGene00003597	WBGene00003776
WBGene00003062	WBGene00005078	WBGene00003605	WBGene00003777
WBGene00003063	WBGene00005642	WBGene00003607	WBGene00003778
WBGene00003064	WBGene00005643	WBGene00003622	WBGene00003787
WBGene00003068	WBGene00005644	WBGene00003623	WBGene00003788
WBGene00003071	WBGene00005647	WBGene00003654	WBGene00003789
WBGene00003072	WBGene00005648	WBGene00003657	WBGene00003793
WBGene00003073	WBGene00005649	WBGene00003675	WBGene00003794
WBGene00003074	WBGene00005662	WBGene00003681	WBGene00003795
WBGene00003075	WBGene00005663	WBGene00003731	WBGene00003796
WBGene00003076	WBGene00006059	WBGene00003733	WBGene00003797
WBGene00003077	WBGene00006061	WBGene00003735	WBGene00003798
WBGene00003078	WBGene00006062	WBGene00003736	WBGene00003799
WBGene00003079	WBGene00006064	WBGene00003738	WBGene00003800
WBGene00003080	WBGene00006307	WBGene00003772	WBGene00003802
WBGene00003081	WBGene00006308	WBGene00003773	WBGene00003803
WBGene00003082	WBGene00006309	WBGene00003774	WBGene00003804
WBGene00003084	WBGene00006349	WBGene00003775	WBGene00003805
WBGene00003085	WBGene00006351	WBGene00003776	WBGene00003806
WBGene00003086	WBGene00006352	WBGene00003778	WBGene00003815
WBGene00003089	WBGene00006364	WBGene00003779	WBGene00003816
WBGene00003100	WBGene00006367	WBGene00003787	WBGene00003818
WBGene00003102	WBGene00006373	WBGene00003788	WBGene00003821
WBGene00003106	WBGene00006382	WBGene00003789	WBGene00003822
WBGene00003107	WBGene00006383	WBGene00003794	WBGene00003825
WBGene00003111	WBGene00006386	WBGene00003796	WBGene00003826
WBGene00003112	WBGene00006387	WBGene00003797	WBGene00003827
WBGene00003119	WBGene00006397	WBGene00003798	WBGene00003828
WBGene00003123	WBGene00006402	WBGene00003799	WBGene00003829
WBGene00003129	WBGene00006405	WBGene00003800	WBGene00003830
WBGene00003130	WBGene00006407	WBGene00003803	WBGene00003831
WBGene00003132	WBGene00006410	WBGene00003804	WBGene00003834
WBGene00003133	WBGene00006411	WBGene00003806	WBGene00003836
WBGene00003134	WBGene00006412	WBGene00003815	WBGene00003841
WBGene00003136	WBGene00006414	WBGene00003816	WBGene00003842
WBGene00003142	WBGene00006415	WBGene00003818	WBGene00003844
WBGene00003143	WBGene00006416	WBGene00003821	WBGene00003846
WBGene00003148	WBGene00006418	WBGene00003822	WBGene00003847
WBGene00003149	WBGene00006424	WBGene00003825	WBGene00003850
WBGene00003150	WBGene00006432	WBGene00003826	WBGene00003858
WBGene00003151	WBGene00006433	WBGene00003827	WBGene00003870
WBGene00003153	WBGene00006434	WBGene00003829	WBGene00003876
WBGene00003154	WBGene00006435	WBGene00003830	WBGene00003877
WBGene00003155	WBGene00006437	WBGene00003831	WBGene00003878
WBGene00003156	WBGene00006438	WBGene00003834	WBGene00003882
WBGene00003157	WBGene00006439	WBGene00003835	WBGene00003883
WBGene00003158	WBGene00006443	WBGene00003836	WBGene00003884
WBGene00003159	WBGene00006446	WBGene00003838	WBGene00003885
WBGene00003161	WBGene00006447	WBGene00003839	WBGene00003886
WBGene00003162	WBGene00006448	WBGene00003840	WBGene00003889
WBGene00003163	WBGene00006460	WBGene00003841	WBGene00003892
WBGene00003164	WBGene00006461	WBGene00003842	WBGene00003893
WBGene00003165	WBGene00006463	WBGene00003844	WBGene00003898
WBGene00003166	WBGene00006465	WBGene00003846	WBGene00003901
WBGene00003168	WBGene00006470	WBGene00003847	WBGene00003902
WBGene00003169	WBGene00006472	WBGene00003851	WBGene00003903
WBGene00003170	WBGene00006473	WBGene00003858	WBGene00003904
WBGene00003171	WBGene00006474	WBGene00003864	WBGene00003905
WBGene00003172	WBGene00006475	WBGene00003865	WBGene00003906
WBGene00003173	WBGene00006477	WBGene00003870	WBGene00003907
WBGene00003174	WBGene00006478	WBGene00003876	WBGene00003909
WBGene00003175	WBGene00006479	WBGene00003877	WBGene00003911
WBGene00003177	WBGene00006481	WBGene00003882	WBGene00003912
WBGene00003178	WBGene00006486	WBGene00003883	WBGene00003914
WBGene00003182	WBGene00006490	WBGene00003884	WBGene00003916
WBGene00003183	WBGene00006491	WBGene00003885	WBGene00003918
WBGene00003185	WBGene00006493	WBGene00003886	WBGene00003919
WBGene00003186	WBGene00006494	WBGene00003889	WBGene00003921
WBGene00003196	WBGene00006497	WBGene00003892	WBGene00003922
WBGene00003209	WBGene00006498	WBGene00003893	WBGene00003923
WBGene00003214	WBGene00006503	WBGene00003898	WBGene00003924
WBGene00003220	WBGene00006505	WBGene00003901	WBGene00003925
WBGene00003222	WBGene00006510	WBGene00003902	WBGene00003926
WBGene00003224	WBGene00006512	WBGene00003903	WBGene00003927
WBGene00003225	WBGene00006515	WBGene00003904	WBGene00003928
WBGene00003229	WBGene00006517	WBGene00003905	WBGene00003929
WBGene00003232	WBGene00006518	WBGene00003906	WBGene00003930
WBGene00003233	WBGene00006520	WBGene00003907	WBGene00003931
WBGene00003234	WBGene00006525	WBGene00003911	WBGene00003932
WBGene00003235	WBGene00006526	WBGene00003914	WBGene00003937
WBGene00003238	WBGene00006527	WBGene00003915	WBGene00003938
WBGene00003241	WBGene00006528	WBGene00003916	WBGene00003939
WBGene00003242	WBGene00006529	WBGene00003918	WBGene00003943
WBGene00003243	WBGene00006530	WBGene00003919	WBGene00003947
WBGene00003246	WBGene00006531	WBGene00003920	WBGene00003948
WBGene00003247	WBGene00006535	WBGene00003921	WBGene00003949
WBGene00003253	WBGene00006536	WBGene00003922	WBGene00003950
WBGene00003254	WBGene00006537	WBGene00003923	WBGene00003951
WBGene00003367	WBGene00006538	WBGene00003924	WBGene00003952
WBGene00003368	WBGene00006541	WBGene00003925	WBGene00003953
WBGene00003369	WBGene00006563	WBGene00003926	WBGene00003954
WBGene00003370	WBGene00006566	WBGene00003927	WBGene00003955
WBGene00003371	WBGene00006567	WBGene00003928	WBGene00003956
WBGene00003372	WBGene00006568	WBGene00003929	WBGene00003957
WBGene00003373	WBGene00006573	WBGene00003930	WBGene00003958
WBGene00003375	WBGene00006575	WBGene00003931	WBGene00003959
WBGene00003376	WBGene00006577	WBGene00003932	WBGene00003961
WBGene00003377	WBGene00006578	WBGene00003947	WBGene00003963
WBGene00003378	WBGene00006579	WBGene00003948	WBGene00003964
WBGene00003380	WBGene00006594	WBGene00003949	WBGene00003965
WBGene00003385	WBGene00006595	WBGene00003950	WBGene00003966
WBGene00003386	WBGene00006596	WBGene00003951	WBGene00003967
WBGene00003387	WBGene00006597	WBGene00003952	WBGene00003969
WBGene00003388	WBGene00006598	WBGene00003953	WBGene00003970
WBGene00003389	WBGene00006599	WBGene00003954	WBGene00003975
WBGene00003390	WBGene00006600	WBGene00003955	WBGene00003978
WBGene00003392	WBGene00006601	WBGene00003961	WBGene00003980
WBGene00003393	WBGene00006606	WBGene00003963	WBGene00003982
WBGene00003394	WBGene00006607	WBGene00003964	WBGene00003989
WBGene00003395	WBGene00006609	WBGene00003965	WBGene00003991
WBGene00003396	WBGene00006611	WBGene00003966	WBGene00003995
WBGene00003397	WBGene00006612	WBGene00003967	WBGene00003996
WBGene00003400	WBGene00006613	WBGene00003969	WBGene00003997
WBGene00003401	WBGene00006614	WBGene00003970	WBGene00003998
WBGene00003402	WBGene00006615	WBGene00003975	WBGene00003999
WBGene00003404	WBGene00006617	WBGene00003978	WBGene00004000
WBGene00003405	WBGene00006619	WBGene00003980	WBGene00004001
WBGene00003407	WBGene00006620	WBGene00003986	WBGene00004002
WBGene00003408	WBGene00006626	WBGene00003995	WBGene00004003
WBGene00003409	WBGene00006633	WBGene00004003	WBGene00004005
WBGene00003410	WBGene00006634	WBGene00004014	WBGene00004006
WBGene00003411	WBGene00006638	WBGene00004015	WBGene00004007
WBGene00003412	WBGene00006647	WBGene00004016	WBGene00004008
WBGene00003413	WBGene00006648	WBGene00004024	WBGene00004011
WBGene00003414	WBGene00006655	WBGene00004025	WBGene00004013
WBGene00003415	WBGene00006669	WBGene00004028	WBGene00004014
WBGene00003417	WBGene00006696	WBGene00004029	WBGene00004015
WBGene00003418	WBGene00006697	WBGene00004031	WBGene00004016
WBGene00003421	WBGene00006699	WBGene00004032	WBGene00004017
WBGene00003422	WBGene00006701	WBGene00004033	WBGene00004024
WBGene00003423	WBGene00006702	WBGene00004034	WBGene00004025
WBGene00003472	WBGene00006703	WBGene00004035	WBGene00004028
WBGene00003475	WBGene00006705	WBGene00004036	WBGene00004029
WBGene00003476	WBGene00006707	WBGene00004038	WBGene00004031
WBGene00003477	WBGene00006708	WBGene00004039	WBGene00004032
WBGene00003478	WBGene00006709	WBGene00004040	WBGene00004033
WBGene00003479	WBGene00006711	WBGene00004042	WBGene00004034
WBGene00003480	WBGene00006715	WBGene00004043	WBGene00004035
WBGene00003482	WBGene00006716	WBGene00004045	WBGene00004036
WBGene00003485	WBGene00006720	WBGene00004046	WBGene00004038
WBGene00003497	WBGene00006724	WBGene00004047	WBGene00004039
WBGene00003504	WBGene00006726	WBGene00004049	WBGene00004040
WBGene00003509	WBGene00006728	WBGene00004053	WBGene00004042
WBGene00003510	WBGene00006729	WBGene00004055	WBGene00004043
WBGene00003511	WBGene00006730	WBGene00004058	WBGene00004044
WBGene00003514	WBGene00006733	WBGene00004059	WBGene00004045
WBGene00003515	WBGene00006734	WBGene00004060	WBGene00004046
WBGene00003516	WBGene00006742	WBGene00004061	WBGene00004047
WBGene00003517	WBGene00006743	WBGene00004063	WBGene00004048
WBGene00003519	WBGene00006745	WBGene00004064	WBGene00004049
WBGene00003533	WBGene00006746	WBGene00004068	WBGene00004051
WBGene00003535	WBGene00006748	WBGene00004075	WBGene00004052
WBGene00003536	WBGene00006752	WBGene00004076	WBGene00004055
WBGene00003537	WBGene00006755	WBGene00004077	WBGene00004058
WBGene00003538	WBGene00006756	WBGene00004085	WBGene00004059
WBGene00003539	WBGene00006757	WBGene00004087	WBGene00004060
WBGene00003540	WBGene00006760	WBGene00004088	WBGene00004061
WBGene00003541	WBGene00006761	WBGene00004089	WBGene00004063
WBGene00003542	WBGene00006762	WBGene00004090	WBGene00004064
WBGene00003543	WBGene00006763	WBGene00004092	WBGene00004068
WBGene00003544	WBGene00006767	WBGene00004101	WBGene00004075
WBGene00003545	WBGene00006768	WBGene00004109	WBGene00004076
WBGene00003546	WBGene00006771	WBGene00004117	WBGene00004077
WBGene00003547	WBGene00006774	WBGene00004121	WBGene00004083
WBGene00003548	WBGene00006776	WBGene00004130	WBGene00004085
WBGene00003549	WBGene00006779	WBGene00004131	WBGene00004086
WBGene00003550	WBGene00006781	WBGene00004134	WBGene00004087
WBGene00003551	WBGene00006783	WBGene00004136	WBGene00004088
WBGene00003552	WBGene00006785	WBGene00004140	WBGene00004089
WBGene00003553	WBGene00006787	WBGene00004143	WBGene00004090
WBGene00003554	WBGene00006789	WBGene00004147	WBGene00004091
WBGene00003555	WBGene00006790	WBGene00004151	WBGene00004092
WBGene00003558	WBGene00006791	WBGene00004166	WBGene00004095
WBGene00003559	WBGene00006793	WBGene00004178	WBGene00004101
WBGene00003561	WBGene00006795	WBGene00004179	WBGene00004104
WBGene00003562	WBGene00006798	WBGene00004180	WBGene00004109
WBGene00003563	WBGene00006801	WBGene00004181	WBGene00004117
WBGene00003564	WBGene00006803	WBGene00004183	WBGene00004121
WBGene00003566	WBGene00006805	WBGene00004184	WBGene00004130
WBGene00003567	WBGene00006807	WBGene00004185	WBGene00004131
WBGene00003569	WBGene00006808	WBGene00004186	WBGene00004134
WBGene00003570	WBGene00006809	WBGene00004187	WBGene00004135
WBGene00003571	WBGene00006810	WBGene00004188	WBGene00004136
WBGene00003572	WBGene00006811	WBGene00004190	WBGene00004140
WBGene00003573	WBGene00006817	WBGene00004191	WBGene00004143
WBGene00003574	WBGene00006822	WBGene00004192	WBGene00004147
WBGene00003575	WBGene00006823	WBGene00004193	WBGene00004151
WBGene00003576	WBGene00006826	WBGene00004194	WBGene00004166
WBGene00003578	WBGene00006829	WBGene00004195	WBGene00004178
WBGene00003579	WBGene00006830	WBGene00004196	WBGene00004179
WBGene00003580	WBGene00006831	WBGene00004197	WBGene00004180
WBGene00003581	WBGene00006832	WBGene00004198	WBGene00004181
WBGene00003582	WBGene00006833	WBGene00004199	WBGene00004183
WBGene00003583	WBGene00006836	WBGene00004201	WBGene00004184
WBGene00003584	WBGene00006840	WBGene00004203	WBGene00004185
WBGene00003585	WBGene00006843	WBGene00004204	WBGene00004186
WBGene00003586	WBGene00006856	WBGene00004205	WBGene00004187
WBGene00003587	WBGene00006862	WBGene00004206	WBGene00004188
WBGene00003588	WBGene00006863	WBGene00004207	WBGene00004189
WBGene00003589	WBGene00006868	WBGene00004208	WBGene00004190
WBGene00003590	WBGene00006870	WBGene00004210	WBGene00004191
WBGene00003592	WBGene00006876	WBGene00004212	WBGene00004192
WBGene00003593	WBGene00006887	WBGene00004213	WBGene00004193
WBGene00003594	WBGene00006888	WBGene00004215	WBGene00004194
WBGene00003595	WBGene00006889	WBGene00004217	WBGene00004195
WBGene00003596	WBGene00006890	WBGene00004224	WBGene00004196
WBGene00003597	WBGene00006910	WBGene00004233	WBGene00004197
WBGene00003598	WBGene00006911	WBGene00004245	WBGene00004198
WBGene00003599	WBGene00006912	WBGene00004248	WBGene00004199
WBGene00003601	WBGene00006913	WBGene00004249	WBGene00004201
WBGene00003605	WBGene00006917	WBGene00004254	WBGene00004203
WBGene00003613	WBGene00006918	WBGene00004255	WBGene00004204
WBGene00003622	WBGene00006919	WBGene00004256	WBGene00004205
WBGene00003623	WBGene00006921	WBGene00004257	WBGene00004206
WBGene00003628	WBGene00006932	WBGene00004258	WBGene00004207
WBGene00003629	WBGene00006933	WBGene00004259	WBGene00004208
WBGene00003639	WBGene00006934	WBGene00004266	WBGene00004209
WBGene00003654	WBGene00006936	WBGene00004267	WBGene00004210
WBGene00003659	WBGene00006937	WBGene00004268	WBGene00004211
WBGene00003675	WBGene00006944	WBGene00004270	WBGene00004212
WBGene00003681	WBGene00006945	WBGene00004271	WBGene00004213
WBGene00003709	WBGene00006946	WBGene00004272	WBGene00004214
WBGene00003729	WBGene00006960	WBGene00004273	WBGene00004215
WBGene00003730	WBGene00006963	WBGene00004274	WBGene00004217
WBGene00003731	WBGene00006964	WBGene00004276	WBGene00004224
WBGene00003732	WBGene00006968	WBGene00004277	WBGene00004233
WBGene00003733	WBGene00006974	WBGene00004278	WBGene00004244
WBGene00003734	WBGene00006987	WBGene00004279	WBGene00004245
WBGene00003735	WBGene00006993	WBGene00004281	WBGene00004248
WBGene00003736	WBGene00006996	WBGene00004282	WBGene00004254
WBGene00003738	WBGene00007000	WBGene00004283	WBGene00004255
WBGene00003772	WBGene00007007	WBGene00004284	WBGene00004256
WBGene00003773	WBGene00007008	WBGene00004285	WBGene00004257
WBGene00003774	WBGene00007009	WBGene00004286	WBGene00004258
WBGene00003775	WBGene00007010	WBGene00004287	WBGene00004259
WBGene00003776	WBGene00007014	WBGene00004296	WBGene00004264
WBGene00003777	WBGene00007017	WBGene00004297	WBGene00004266
WBGene00003778	WBGene00007018	WBGene00004298	WBGene00004267
WBGene00003787	WBGene00007020	WBGene00004300	WBGene00004268
WBGene00003788	WBGene00007021	WBGene00004302	WBGene00004269
WBGene00003789	WBGene00007026	WBGene00004304	WBGene00004270
WBGene00003794	WBGene00007028	WBGene00004305	WBGene00004271
WBGene00003795	WBGene00007029	WBGene00004307	WBGene00004272
WBGene00003796	WBGene00007036	WBGene00004308	WBGene00004273
WBGene00003797	WBGene00007042	WBGene00004310	WBGene00004274
WBGene00003798	WBGene00007043	WBGene00004311	WBGene00004276
WBGene00003799	WBGene00007045	WBGene00004313	WBGene00004277
WBGene00003800	WBGene00007048	WBGene00004314	WBGene00004278
WBGene00003803	WBGene00007050	WBGene00004315	WBGene00004279
WBGene00003804	WBGene00007054	WBGene00004317	WBGene00004281
WBGene00003805	WBGene00007055	WBGene00004318	WBGene00004282
WBGene00003806	WBGene00007056	WBGene00004319	WBGene00004283
WBGene00003807	WBGene00007057	WBGene00004320	WBGene00004285
WBGene00003808	WBGene00007059	WBGene00004321	WBGene00004286
WBGene00003815	WBGene00007067	WBGene00004322	WBGene00004287
WBGene00003816	WBGene00007080	WBGene00004335	WBGene00004296
WBGene00003818	WBGene00007099	WBGene00004336	WBGene00004297
WBGene00003821	WBGene00007102	WBGene00004337	WBGene00004298
WBGene00003822	WBGene00007103	WBGene00004338	WBGene00004302
WBGene00003825	WBGene00007106	WBGene00004339	WBGene00004303
WBGene00003826	WBGene00007108	WBGene00004340	WBGene00004304
WBGene00003827	WBGene00007111	WBGene00004341	WBGene00004305
WBGene00003828	WBGene00007114	WBGene00004343	WBGene00004306
WBGene00003829	WBGene00007117	WBGene00004344	WBGene00004307
WBGene00003830	WBGene00007122	WBGene00004345	WBGene00004308
WBGene00003831	WBGene00007128	WBGene00004348	WBGene00004309
WBGene00003834	WBGene00007129	WBGene00004355	WBGene00004310
WBGene00003835	WBGene00007137	WBGene00004356	WBGene00004311
WBGene00003836	WBGene00007138	WBGene00004357	WBGene00004312
WBGene00003838	WBGene00007143	WBGene00004358	WBGene00004313
WBGene00003839	WBGene00007144	WBGene00004361	WBGene00004314
WBGene00003840	WBGene00007145	WBGene00004363	WBGene00004315
WBGene00003841	WBGene00007150	WBGene00004364	WBGene00004316
WBGene00003842	WBGene00007174	WBGene00004367	WBGene00004317
WBGene00003843	WBGene00007175	WBGene00004368	WBGene00004318
WBGene00003844	WBGene00007184	WBGene00004371	WBGene00004319
WBGene00003845	WBGene00007188	WBGene00004372	WBGene00004320
WBGene00003846	WBGene00007189	WBGene00004373	WBGene00004321
WBGene00003847	WBGene00007194	WBGene00004375	WBGene00004322
WBGene00003851	WBGene00007197	WBGene00004377	WBGene00004335
WBGene00003858	WBGene00007201	WBGene00004378	WBGene00004336
WBGene00003862	WBGene00007202	WBGene00004381	WBGene00004337
WBGene00003863	WBGene00007210	WBGene00004382	WBGene00004338
WBGene00003864	WBGene00007215	WBGene00004383	WBGene00004339
WBGene00003865	WBGene00007216	WBGene00004385	WBGene00004340
WBGene00003870	WBGene00007217	WBGene00004386	WBGene00004341
WBGene00003876	WBGene00007226	WBGene00004387	WBGene00004343
WBGene00003877	WBGene00007234	WBGene00004388	WBGene00004344
WBGene00003878	WBGene00007235	WBGene00004389	WBGene00004345
WBGene00003882	WBGene00007236	WBGene00004390	WBGene00004348
WBGene00003883	WBGene00007256	WBGene00004391	WBGene00004350
WBGene00003884	WBGene00007267	WBGene00004392	WBGene00004355
WBGene00003885	WBGene00007277	WBGene00004393	WBGene00004356
WBGene00003886	WBGene00007287	WBGene00004395	WBGene00004357
WBGene00003889	WBGene00007302	WBGene00004397	WBGene00004358
WBGene00003892	WBGene00007330	WBGene00004398	WBGene00004359
WBGene00003893	WBGene00007339	WBGene00004400	WBGene00004360
WBGene00003898	WBGene00007347	WBGene00004402	WBGene00004361
WBGene00003901	WBGene00007350	WBGene00004403	WBGene00004364
WBGene00003902	WBGene00007351	WBGene00004404	WBGene00004367
WBGene00003903	WBGene00007352	WBGene00004405	WBGene00004368
WBGene00003904	WBGene00007355	WBGene00004408	WBGene00004371
WBGene00003905	WBGene00007363	WBGene00004409	WBGene00004372
WBGene00003906	WBGene00007364	WBGene00004411	WBGene00004373
WBGene00003907	WBGene00007384	WBGene00004412	WBGene00004375
WBGene00003909	WBGene00007387	WBGene00004413	WBGene00004377
WBGene00003911	WBGene00007388	WBGene00004414	WBGene00004378
WBGene00003912	WBGene00007400	WBGene00004415	WBGene00004381
WBGene00003914	WBGene00007412	WBGene00004416	WBGene00004383
WBGene00003915	WBGene00007413	WBGene00004417	WBGene00004385
WBGene00003916	WBGene00007428	WBGene00004418	WBGene00004386
WBGene00003918	WBGene00007429	WBGene00004419	WBGene00004387
WBGene00003919	WBGene00007434	WBGene00004420	WBGene00004388
WBGene00003920	WBGene00007435	WBGene00004421	WBGene00004389
WBGene00003921	WBGene00007436	WBGene00004422	WBGene00004390
WBGene00003922	WBGene00007438	WBGene00004423	WBGene00004391
WBGene00003923	WBGene00007444	WBGene00004424	WBGene00004392
WBGene00003924	WBGene00007446	WBGene00004425	WBGene00004393
WBGene00003925	WBGene00007463	WBGene00004426	WBGene00004395
WBGene00003926	WBGene00007480	WBGene00004427	WBGene00004400
WBGene00003927	WBGene00007505	WBGene00004428	WBGene00004401
WBGene00003928	WBGene00007507	WBGene00004429	WBGene00004402
WBGene00003929	WBGene00007508	WBGene00004430	WBGene00004403
WBGene00003930	WBGene00007509	WBGene00004431	WBGene00004404
WBGene00003931	WBGene00007514	WBGene00004432	WBGene00004405
WBGene00003932	WBGene00007516	WBGene00004433	WBGene00004408
WBGene00003933	WBGene00007517	WBGene00004434	WBGene00004409
WBGene00003934	WBGene00007528	WBGene00004435	WBGene00004410
WBGene00003937	WBGene00007531	WBGene00004436	WBGene00004411
WBGene00003938	WBGene00007534	WBGene00004437	WBGene00004412
WBGene00003939	WBGene00007548	WBGene00004438	WBGene00004413
WBGene00003941	WBGene00007549	WBGene00004439	WBGene00004414
WBGene00003943	WBGene00007554	WBGene00004440	WBGene00004415
WBGene00003947	WBGene00007555	WBGene00004441	WBGene00004416
WBGene00003948	WBGene00007556	WBGene00004442	WBGene00004417
WBGene00003949	WBGene00007561	WBGene00004444	WBGene00004418
WBGene00003950	WBGene00007564	WBGene00004445	WBGene00004419
WBGene00003951	WBGene00007576	WBGene00004446	WBGene00004420
WBGene00003952	WBGene00007581	WBGene00004447	WBGene00004421
WBGene00003953	WBGene00007584	WBGene00004448	WBGene00004422
WBGene00003954	WBGene00007588	WBGene00004449	WBGene00004423
WBGene00003955	WBGene00007591	WBGene00004450	WBGene00004424
WBGene00003956	WBGene00007593	WBGene00004451	WBGene00004425
WBGene00003957	WBGene00007595	WBGene00004452	WBGene00004426
WBGene00003958	WBGene00007617	WBGene00004453	WBGene00004427
WBGene00003959	WBGene00007620	WBGene00004454	WBGene00004428
WBGene00003961	WBGene00007622	WBGene00004456	WBGene00004429
WBGene00003962	WBGene00007623	WBGene00004457	WBGene00004430
WBGene00003963	WBGene00007625	WBGene00004458	WBGene00004431
WBGene00003964	WBGene00007626	WBGene00004459	WBGene00004432
WBGene00003965	WBGene00007664	WBGene00004460	WBGene00004433
WBGene00003966	WBGene00007666	WBGene00004461	WBGene00004434
WBGene00003967	WBGene00007686	WBGene00004462	WBGene00004435
WBGene00003969	WBGene00007690	WBGene00004463	WBGene00004436
WBGene00003970	WBGene00007696	WBGene00004464	WBGene00004437
WBGene00003975	WBGene00007703	WBGene00004465	WBGene00004438
WBGene00003976	WBGene00007707	WBGene00004466	WBGene00004439
WBGene00003978	WBGene00007711	WBGene00004467	WBGene00004440
WBGene00003980	WBGene00007712	WBGene00004468	WBGene00004441
WBGene00003982	WBGene00007730	WBGene00004469	WBGene00004442
WBGene00003986	WBGene00007744	WBGene00004470	WBGene00004443
WBGene00003995	WBGene00007745	WBGene00004471	WBGene00004444
WBGene00003996	WBGene00007752	WBGene00004472	WBGene00004445
WBGene00004003	WBGene00007753	WBGene00004473	WBGene00004446
WBGene00004011	WBGene00007755	WBGene00004474	WBGene00004447
WBGene00004013	WBGene00007774	WBGene00004475	WBGene00004448
WBGene00004014	WBGene00007784	WBGene00004476	WBGene00004449
WBGene00004015	WBGene00007787	WBGene00004477	WBGene00004450
WBGene00004016	WBGene00007799	WBGene00004478	WBGene00004451
WBGene00004020	WBGene00007801	WBGene00004479	WBGene00004452
WBGene00004023	WBGene00007812	WBGene00004480	WBGene00004453
WBGene00004025	WBGene00007825	WBGene00004481	WBGene00004454
WBGene00004026	WBGene00007836	WBGene00004482	WBGene00004456
WBGene00004028	WBGene00007848	WBGene00004483	WBGene00004457
WBGene00004029	WBGene00007860	WBGene00004484	WBGene00004458
WBGene00004030	WBGene00007878	WBGene00004485	WBGene00004459
WBGene00004031	WBGene00007880	WBGene00004486	WBGene00004460
WBGene00004032	WBGene00007882	WBGene00004487	WBGene00004461
WBGene00004033	WBGene00007886	WBGene00004488	WBGene00004462
WBGene00004034	WBGene00007904	WBGene00004489	WBGene00004463
WBGene00004035	WBGene00007913	WBGene00004490	WBGene00004464
WBGene00004036	WBGene00007917	WBGene00004491	WBGene00004465
WBGene00004038	WBGene00007918	WBGene00004492	WBGene00004466
WBGene00004039	WBGene00007922	WBGene00004493	WBGene00004467
WBGene00004040	WBGene00007924	WBGene00004494	WBGene00004468
WBGene00004042	WBGene00007927	WBGene00004495	WBGene00004469
WBGene00004043	WBGene00007941	WBGene00004496	WBGene00004470
WBGene00004044	WBGene00007942	WBGene00004497	WBGene00004471
WBGene00004045	WBGene00007952	WBGene00004498	WBGene00004472
WBGene00004046	WBGene00007953	WBGene00004501	WBGene00004473
WBGene00004047	WBGene00007954	WBGene00004502	WBGene00004474
WBGene00004048	WBGene00007956	WBGene00004503	WBGene00004475
WBGene00004049	WBGene00007959	WBGene00004504	WBGene00004476
WBGene00004050	WBGene00007963	WBGene00004505	WBGene00004477
WBGene00004051	WBGene00007964	WBGene00004506	WBGene00004478
WBGene00004052	WBGene00007967	WBGene00004507	WBGene00004479
WBGene00004053	WBGene00007969	WBGene00004679	WBGene00004480
WBGene00004055	WBGene00007971	WBGene00004680	WBGene00004481
WBGene00004056	WBGene00007972	WBGene00004682	WBGene00004482
WBGene00004058	WBGene00007974	WBGene00004698	WBGene00004483
WBGene00004059	WBGene00007979	WBGene00004700	WBGene00004484
WBGene00004060	WBGene00007980	WBGene00004701	WBGene00004485
WBGene00004061	WBGene00007982	WBGene00004703	WBGene00004486
WBGene00004062	WBGene00007993	WBGene00004704	WBGene00004487
WBGene00004063	WBGene00008000	WBGene00004705	WBGene00004488
WBGene00004064	WBGene00008006	WBGene00004706	WBGene00004489
WBGene00004068	WBGene00008008	WBGene00004719	WBGene00004490
WBGene00004075	WBGene00008018	WBGene00004723	WBGene00004491
WBGene00004076	WBGene00008019	WBGene00004727	WBGene00004492
WBGene00004077	WBGene00008033	WBGene00004728	WBGene00004493
WBGene00004085	WBGene00008041	WBGene00004729	WBGene00004494
WBGene00004086	WBGene00008052	WBGene00004732	WBGene00004495
WBGene00004087	WBGene00008053	WBGene00004735	WBGene00004496
WBGene00004088	WBGene00008078	WBGene00004736	WBGene00004497
WBGene00004089	WBGene00008093	WBGene00004738	WBGene00004498
WBGene00004090	WBGene00008117	WBGene00004740	WBGene00004499
WBGene00004091	WBGene00008119	WBGene00004742	WBGene00004501
WBGene00004092	WBGene00008121	WBGene00004743	WBGene00004502
WBGene00004095	WBGene00008122	WBGene00004744	WBGene00004503
WBGene00004101	WBGene00008131	WBGene00004749	WBGene00004504
WBGene00004109	WBGene00008132	WBGene00004752	WBGene00004505
WBGene00004117	WBGene00008133	WBGene00004753	WBGene00004506
WBGene00004121	WBGene00008136	WBGene00004754	WBGene00004507
WBGene00004130	WBGene00008137	WBGene00004755	WBGene00004679
WBGene00004131	WBGene00008148	WBGene00004756	WBGene00004680
WBGene00004134	WBGene00008149	WBGene00004758	WBGene00004682
WBGene00004135	WBGene00008151	WBGene00004759	WBGene00004698
WBGene00004136	WBGene00008164	WBGene00004760	WBGene00004700
WBGene00004140	WBGene00008165	WBGene00004762	WBGene00004701
WBGene00004147	WBGene00008167	WBGene00004766	WBGene00004703
WBGene00004151	WBGene00008205	WBGene00004767	WBGene00004704
WBGene00004166	WBGene00008220	WBGene00004768	WBGene00004705
WBGene00004178	WBGene00008225	WBGene00004769	WBGene00004706
WBGene00004179	WBGene00008237	WBGene00004771	WBGene00004719
WBGene00004180	WBGene00008238	WBGene00004773	WBGene00004723
WBGene00004181	WBGene00008239	WBGene00004774	WBGene00004727
WBGene00004182	WBGene00008258	WBGene00004777	WBGene00004728
WBGene00004183	WBGene00008273	WBGene00004778	WBGene00004729
WBGene00004184	WBGene00008288	WBGene00004781	WBGene00004732
WBGene00004185	WBGene00008311	WBGene00004782	WBGene00004735
WBGene00004186	WBGene00008316	WBGene00004787	WBGene00004736
WBGene00004187	WBGene00008317	WBGene00004788	WBGene00004737
WBGene00004188	WBGene00008320	WBGene00004789	WBGene00004738
WBGene00004190	WBGene00008338	WBGene00004790	WBGene00004740
WBGene00004191	WBGene00008339	WBGene00004793	WBGene00004742
WBGene00004192	WBGene00008345	WBGene00004800	WBGene00004743
WBGene00004193	WBGene00008354	WBGene00004801	WBGene00004744
WBGene00004194	WBGene00008364	WBGene00004802	WBGene00004749
WBGene00004195	WBGene00008366	WBGene00004803	WBGene00004752
WBGene00004197	WBGene00008370	WBGene00004804	WBGene00004753
WBGene00004198	WBGene00008371	WBGene00004806	WBGene00004754
WBGene00004201	WBGene00008379	WBGene00004807	WBGene00004755
WBGene00004203	WBGene00008386	WBGene00004808	WBGene00004756
WBGene00004204	WBGene00008398	WBGene00004824	WBGene00004758
WBGene00004205	WBGene00008402	WBGene00004829	WBGene00004759
WBGene00004206	WBGene00008405	WBGene00004830	WBGene00004760
WBGene00004207	WBGene00008408	WBGene00004831	WBGene00004762
WBGene00004208	WBGene00008410	WBGene00004854	WBGene00004766
WBGene00004209	WBGene00008411	WBGene00004855	WBGene00004767
WBGene00004210	WBGene00008412	WBGene00004856	WBGene00004768
WBGene00004211	WBGene00008415	WBGene00004858	WBGene00004769
WBGene00004212	WBGene00008419	WBGene00004860	WBGene00004771
WBGene00004213	WBGene00008425	WBGene00004873	WBGene00004773
WBGene00004214	WBGene00008430	WBGene00004874	WBGene00004774
WBGene00004215	WBGene00008431	WBGene00004875	WBGene00004776
WBGene00004216	WBGene00008435	WBGene00004876	WBGene00004777
WBGene00004217	WBGene00008439	WBGene00004877	WBGene00004779
WBGene00004218	WBGene00008441	WBGene00004878	WBGene00004780
WBGene00004219	WBGene00008452	WBGene00004879	WBGene00004781
WBGene00004220	WBGene00008455	WBGene00004880	WBGene00004782
WBGene00004221	WBGene00008456	WBGene00004881	WBGene00004786
WBGene00004222	WBGene00008458	WBGene00004882	WBGene00004787
WBGene00004223	WBGene00008480	WBGene00004884	WBGene00004788
WBGene00004224	WBGene00008499	WBGene00004886	WBGene00004789
WBGene00004225	WBGene00008502	WBGene00004887	WBGene00004790
WBGene00004226	WBGene00008504	WBGene00004888	WBGene00004793
WBGene00004227	WBGene00008505	WBGene00004889	WBGene00004800
WBGene00004228	WBGene00008506	WBGene00004891	WBGene00004801
WBGene00004229	WBGene00008510	WBGene00004895	WBGene00004802
WBGene00004230	WBGene00008514	WBGene00004896	WBGene00004803
WBGene00004231	WBGene00008519	WBGene00004897	WBGene00004806
WBGene00004232	WBGene00008521	WBGene00004910	WBGene00004807
WBGene00004233	WBGene00008531	WBGene00004912	WBGene00004808
WBGene00004234	WBGene00008532	WBGene00004913	WBGene00004829
WBGene00004235	WBGene00008538	WBGene00004914	WBGene00004830
WBGene00004236	WBGene00008546	WBGene00004916	WBGene00004831
WBGene00004237	WBGene00008547	WBGene00004917	WBGene00004854
WBGene00004239	WBGene00008548	WBGene00004918	WBGene00004855
WBGene00004241	WBGene00008564	WBGene00004919	WBGene00004856
WBGene00004242	WBGene00008565	WBGene00004920	WBGene00004857
WBGene00004243	WBGene00008566	WBGene00004921	WBGene00004860
WBGene00004248	WBGene00008567	WBGene00004927	WBGene00004873
WBGene00004254	WBGene00008571	WBGene00004929	WBGene00004874
WBGene00004255	WBGene00008586	WBGene00004930	WBGene00004875
WBGene00004256	WBGene00008598	WBGene00004931	WBGene00004876
WBGene00004257	WBGene00008599	WBGene00004932	WBGene00004877
WBGene00004258	WBGene00008606	WBGene00004947	WBGene00004878
WBGene00004259	WBGene00008624	WBGene00004950	WBGene00004879
WBGene00004266	WBGene00008639	WBGene00004951	WBGene00004880
WBGene00004267	WBGene00008642	WBGene00004952	WBGene00004881
WBGene00004268	WBGene00008645	WBGene00004959	WBGene00004882
WBGene00004270	WBGene00008646	WBGene00004963	WBGene00004884
WBGene00004271	WBGene00008654	WBGene00004969	WBGene00004886
WBGene00004272	WBGene00008664	WBGene00004975	WBGene00004887
WBGene00004273	WBGene00008678	WBGene00004978	WBGene00004888
WBGene00004274	WBGene00008684	WBGene00004979	WBGene00004889
WBGene00004275	WBGene00008685	WBGene00004980	WBGene00004891
WBGene00004276	WBGene00008686	WBGene00004981	WBGene00004892
WBGene00004277	WBGene00008693	WBGene00004985	WBGene00004895
WBGene00004278	WBGene00008694	WBGene00004993	WBGene00004896
WBGene00004279	WBGene00008706	WBGene00004995	WBGene00004897
WBGene00004281	WBGene00008729	WBGene00005006	WBGene00004898
WBGene00004282	WBGene00008733	WBGene00005007	WBGene00004905
WBGene00004283	WBGene00008741	WBGene00005009	WBGene00004910
WBGene00004284	WBGene00008746	WBGene00005010	WBGene00004912
WBGene00004285	WBGene00008765	WBGene00005014	WBGene00004913
WBGene00004286	WBGene00008766	WBGene00005015	WBGene00004914
WBGene00004287	WBGene00008767	WBGene00005016	WBGene00004915
WBGene00004296	WBGene00008769	WBGene00005017	WBGene00004916
WBGene00004297	WBGene00008774	WBGene00005019	WBGene00004917
WBGene00004298	WBGene00008775	WBGene00005020	WBGene00004918
WBGene00004302	WBGene00008780	WBGene00005021	WBGene00004919
WBGene00004303	WBGene00008781	WBGene00005022	WBGene00004920
WBGene00004304	WBGene00008793	WBGene00005023	WBGene00004921
WBGene00004305	WBGene00008800	WBGene00005025	WBGene00004922
WBGene00004306	WBGene00008806	WBGene00005026	WBGene00004923
WBGene00004307	WBGene00008808	WBGene00005077	WBGene00004924
WBGene00004308	WBGene00008809	WBGene00005078	WBGene00004927
WBGene00004310	WBGene00008810	WBGene00005642	WBGene00004929
WBGene00004311	WBGene00008819	WBGene00005643	WBGene00004930
WBGene00004312	WBGene00008832	WBGene00005644	WBGene00004931
WBGene00004313	WBGene00008852	WBGene00005647	WBGene00004932
WBGene00004314	WBGene00008856	WBGene00005648	WBGene00004933
WBGene00004315	WBGene00008876	WBGene00005649	WBGene00004947
WBGene00004316	WBGene00008877	WBGene00005662	WBGene00004949
WBGene00004317	WBGene00008897	WBGene00005663	WBGene00004950
WBGene00004318	WBGene00008905	WBGene00006055	WBGene00004951
WBGene00004319	WBGene00008919	WBGene00006059	WBGene00004952
WBGene00004320	WBGene00008920	WBGene00006061	WBGene00004959
WBGene00004321	WBGene00008924	WBGene00006062	WBGene00004969
WBGene00004322	WBGene00008927	WBGene00006064	WBGene00004975
WBGene00004335	WBGene00008939	WBGene00006307	WBGene00004978
WBGene00004336	WBGene00008950	WBGene00006308	WBGene00004979
WBGene00004337	WBGene00008956	WBGene00006309	WBGene00004980
WBGene00004338	WBGene00008959	WBGene00006310	WBGene00004981
WBGene00004339	WBGene00008974	WBGene00006318	WBGene00004985
WBGene00004340	WBGene00008979	WBGene00006321	WBGene00004995
WBGene00004341	WBGene00008999	WBGene00006324	WBGene00004996
WBGene00004343	WBGene00009002	WBGene00006349	WBGene00005007
WBGene00004344	WBGene00009006	WBGene00006351	WBGene00005010
WBGene00004345	WBGene00009007	WBGene00006352	WBGene00005013
WBGene00004347	WBGene00009010	WBGene00006359	WBGene00005014
WBGene00004348	WBGene00009012	WBGene00006364	WBGene00005015
WBGene00004350	WBGene00009023	WBGene00006365	WBGene00005019
WBGene00004355	WBGene00009035	WBGene00006367	WBGene00005020
WBGene00004356	WBGene00009045	WBGene00006368	WBGene00005021
WBGene00004357	WBGene00009048	WBGene00006369	WBGene00005022
WBGene00004358	WBGene00009049	WBGene00006373	WBGene00005023
WBGene00004359	WBGene00009050	WBGene00006380	WBGene00005024
WBGene00004360	WBGene00009051	WBGene00006382	WBGene00005025
WBGene00004361	WBGene00009057	WBGene00006383	WBGene00005026
WBGene00004364	WBGene00009064	WBGene00006384	WBGene00005077
WBGene00004367	WBGene00009065	WBGene00006385	WBGene00005078
WBGene00004368	WBGene00009082	WBGene00006386	WBGene00005153
WBGene00004371	WBGene00009084	WBGene00006387	WBGene00005226
WBGene00004372	WBGene00009092	WBGene00006388	WBGene00005643
WBGene00004373	WBGene00009100	WBGene00006389	WBGene00005647
WBGene00004374	WBGene00009116	WBGene00006393	WBGene00005648
WBGene00004375	WBGene00009119	WBGene00006394	WBGene00005662
WBGene00004377	WBGene00009120	WBGene00006397	WBGene00005663
WBGene00004378	WBGene00009122	WBGene00006405	WBGene00005895
WBGene00004381	WBGene00009123	WBGene00006406	WBGene00006059
WBGene00004382	WBGene00009124	WBGene00006407	WBGene00006061
WBGene00004383	WBGene00009126	WBGene00006410	WBGene00006062
WBGene00004384	WBGene00009131	WBGene00006411	WBGene00006063
WBGene00004385	WBGene00009138	WBGene00006412	WBGene00006064
WBGene00004386	WBGene00009140	WBGene00006414	WBGene00006307
WBGene00004387	WBGene00009145	WBGene00006415	WBGene00006308
WBGene00004388	WBGene00009155	WBGene00006416	WBGene00006309
WBGene00004389	WBGene00009158	WBGene00006423	WBGene00006310
WBGene00004390	WBGene00009163	WBGene00006432	WBGene00006318
WBGene00004391	WBGene00009164	WBGene00006433	WBGene00006321
WBGene00004392	WBGene00009172	WBGene00006434	WBGene00006324
WBGene00004393	WBGene00009177	WBGene00006435	WBGene00006331
WBGene00004395	WBGene00009186	WBGene00006436	WBGene00006349
WBGene00004400	WBGene00009187	WBGene00006437	WBGene00006351
WBGene00004401	WBGene00009207	WBGene00006438	WBGene00006352
WBGene00004402	WBGene00009211	WBGene00006439	WBGene00006359
WBGene00004403	WBGene00009218	WBGene00006442	WBGene00006363
WBGene00004404	WBGene00009221	WBGene00006443	WBGene00006364
WBGene00004405	WBGene00009226	WBGene00006444	WBGene00006365
WBGene00004408	WBGene00009232	WBGene00006446	WBGene00006367
WBGene00004409	WBGene00009246	WBGene00006447	WBGene00006368
WBGene00004410	WBGene00009260	WBGene00006448	WBGene00006369
WBGene00004411	WBGene00009262	WBGene00006459	WBGene00006373
WBGene00004412	WBGene00009264	WBGene00006460	WBGene00006382
WBGene00004413	WBGene00009266	WBGene00006461	WBGene00006383
WBGene00004414	WBGene00009271	WBGene00006463	WBGene00006385
WBGene00004415	WBGene00009277	WBGene00006465	WBGene00006386
WBGene00004416	WBGene00009285	WBGene00006466	WBGene00006387
WBGene00004417	WBGene00009287	WBGene00006467	WBGene00006388
WBGene00004418	WBGene00009290	WBGene00006468	WBGene00006389
WBGene00004419	WBGene00009292	WBGene00006470	WBGene00006390
WBGene00004420	WBGene00009305	WBGene00006472	WBGene00006391
WBGene00004421	WBGene00009316	WBGene00006473	WBGene00006392
WBGene00004422	WBGene00009319	WBGene00006474	WBGene00006393
WBGene00004423	WBGene00009320	WBGene00006477	WBGene00006396
WBGene00004424	WBGene00009322	WBGene00006478	WBGene00006397
WBGene00004425	WBGene00009326	WBGene00006479	WBGene00006402
WBGene00004426	WBGene00009334	WBGene00006481	WBGene00006405
WBGene00004427	WBGene00009335	WBGene00006483	WBGene00006406
WBGene00004428	WBGene00009336	WBGene00006489	WBGene00006407
WBGene00004429	WBGene00009342	WBGene00006490	WBGene00006410
WBGene00004430	WBGene00009352	WBGene00006491	WBGene00006411
WBGene00004431	WBGene00009354	WBGene00006493	WBGene00006412
WBGene00004432	WBGene00009366	WBGene00006494	WBGene00006414
WBGene00004433	WBGene00009368	WBGene00006496	WBGene00006415
WBGene00004434	WBGene00009369	WBGene00006497	WBGene00006416
WBGene00004435	WBGene00009372	WBGene00006498	WBGene00006418
WBGene00004436	WBGene00009435	WBGene00006503	WBGene00006423
WBGene00004437	WBGene00009436	WBGene00006505	WBGene00006424
WBGene00004438	WBGene00009439	WBGene00006508	WBGene00006431
WBGene00004439	WBGene00009440	WBGene00006510	WBGene00006432
WBGene00004440	WBGene00009441	WBGene00006512	WBGene00006433
WBGene00004441	WBGene00009450	WBGene00006513	WBGene00006434
WBGene00004443	WBGene00009452	WBGene00006514	WBGene00006435
WBGene00004444	WBGene00009455	WBGene00006515	WBGene00006437
WBGene00004445	WBGene00009475	WBGene00006516	WBGene00006438
WBGene00004446	WBGene00009478	WBGene00006518	WBGene00006439
WBGene00004447	WBGene00009498	WBGene00006519	WBGene00006442
WBGene00004449	WBGene00009500	WBGene00006520	WBGene00006443
WBGene00004450	WBGene00009503	WBGene00006524	WBGene00006444
WBGene00004452	WBGene00009513	WBGene00006525	WBGene00006446
WBGene00004453	WBGene00009521	WBGene00006526	WBGene00006447
WBGene00004454	WBGene00009531	WBGene00006527	WBGene00006448
WBGene00004456	WBGene00009542	WBGene00006538	WBGene00006452
WBGene00004457	WBGene00009552	WBGene00006540	WBGene00006460
WBGene00004458	WBGene00009554	WBGene00006541	WBGene00006461
WBGene00004459	WBGene00009557	WBGene00006542	WBGene00006463
WBGene00004460	WBGene00009559	WBGene00006543	WBGene00006465
WBGene00004461	WBGene00009563	WBGene00006545	WBGene00006467
WBGene00004462	WBGene00009574	WBGene00006546	WBGene00006468
WBGene00004463	WBGene00009575	WBGene00006547	WBGene00006470
WBGene00004464	WBGene00009580	WBGene00006562	WBGene00006472
WBGene00004465	WBGene00009583	WBGene00006563	WBGene00006473
WBGene00004466	WBGene00009617	WBGene00006565	WBGene00006474
WBGene00004467	WBGene00009618	WBGene00006566	WBGene00006476
WBGene00004468	WBGene00009619	WBGene00006567	WBGene00006477
WBGene00004469	WBGene00009622	WBGene00006568	WBGene00006478
WBGene00004470	WBGene00009628	WBGene00006572	WBGene00006479
WBGene00004471	WBGene00009635	WBGene00006573	WBGene00006481
WBGene00004472	WBGene00009647	WBGene00006574	WBGene00006483
WBGene00004473	WBGene00009654	WBGene00006575	WBGene00006487
WBGene00004474	WBGene00009658	WBGene00006578	WBGene00006489
WBGene00004475	WBGene00009664	WBGene00006579	WBGene00006490
WBGene00004476	WBGene00009666	WBGene00006580	WBGene00006491
WBGene00004477	WBGene00009668	WBGene00006584	WBGene00006493
WBGene00004478	WBGene00009671	WBGene00006585	WBGene00006494
WBGene00004479	WBGene00009672	WBGene00006586	WBGene00006496
WBGene00004480	WBGene00009674	WBGene00006590	WBGene00006497
WBGene00004481	WBGene00009681	WBGene00006594	WBGene00006498
WBGene00004482	WBGene00009711	WBGene00006595	WBGene00006503
WBGene00004483	WBGene00009726	WBGene00006596	WBGene00006504
WBGene00004484	WBGene00009732	WBGene00006597	WBGene00006505
WBGene00004485	WBGene00009734	WBGene00006598	WBGene00006508
WBGene00004486	WBGene00009735	WBGene00006599	WBGene00006510
WBGene00004487	WBGene00009736	WBGene00006601	WBGene00006512
WBGene00004488	WBGene00009769	WBGene00006606	WBGene00006513
WBGene00004489	WBGene00009771	WBGene00006609	WBGene00006514
WBGene00004490	WBGene00009772	WBGene00006611	WBGene00006515
WBGene00004491	WBGene00009773	WBGene00006612	WBGene00006516
WBGene00004492	WBGene00009776	WBGene00006613	WBGene00006517
WBGene00004493	WBGene00009781	WBGene00006615	WBGene00006518
WBGene00004494	WBGene00009783	WBGene00006616	WBGene00006519
WBGene00004495	WBGene00009784	WBGene00006617	WBGene00006520
WBGene00004496	WBGene00009793	WBGene00006619	WBGene00006524
WBGene00004497	WBGene00009801	WBGene00006620	WBGene00006525
WBGene00004498	WBGene00009812	WBGene00006624	WBGene00006526
WBGene00004499	WBGene00009813	WBGene00006625	WBGene00006527
WBGene00004501	WBGene00009829	WBGene00006626	WBGene00006528
WBGene00004502	WBGene00009831	WBGene00006633	WBGene00006529
WBGene00004503	WBGene00009865	WBGene00006634	WBGene00006530
WBGene00004504	WBGene00009867	WBGene00006638	WBGene00006531
WBGene00004505	WBGene00009876	WBGene00006647	WBGene00006532
WBGene00004506	WBGene00009902	WBGene00006648	WBGene00006533
WBGene00004507	WBGene00009903	WBGene00006652	WBGene00006534
WBGene00004679	WBGene00009918	WBGene00006654	WBGene00006535
WBGene00004680	WBGene00009919	WBGene00006655	WBGene00006536
WBGene00004682	WBGene00009920	WBGene00006662	WBGene00006537
WBGene00004698	WBGene00009925	WBGene00006669	WBGene00006538
WBGene00004699	WBGene00009944	WBGene00006671	WBGene00006540
WBGene00004700	WBGene00009947	WBGene00006696	WBGene00006541
WBGene00004701	WBGene00009952	WBGene00006697	WBGene00006542
WBGene00004702	WBGene00009966	WBGene00006698	WBGene00006543
WBGene00004703	WBGene00009976	WBGene00006699	WBGene00006562
WBGene00004704	WBGene00009978	WBGene00006700	WBGene00006563
WBGene00004705	WBGene00009987	WBGene00006701	WBGene00006565
WBGene00004706	WBGene00009992	WBGene00006702	WBGene00006566
WBGene00004719	WBGene00010015	WBGene00006703	WBGene00006567
WBGene00004723	WBGene00010035	WBGene00006704	WBGene00006568
WBGene00004727	WBGene00010038	WBGene00006705	WBGene00006571
WBGene00004728	WBGene00010040	WBGene00006706	WBGene00006572
WBGene00004729	WBGene00010042	WBGene00006707	WBGene00006573
WBGene00004732	WBGene00010044	WBGene00006708	WBGene00006574
WBGene00004735	WBGene00010045	WBGene00006709	WBGene00006575
WBGene00004736	WBGene00010052	WBGene00006711	WBGene00006577
WBGene00004737	WBGene00010054	WBGene00006713	WBGene00006578
WBGene00004738	WBGene00010055	WBGene00006714	WBGene00006579
WBGene00004740	WBGene00010061	WBGene00006715	WBGene00006584
WBGene00004742	WBGene00010062	WBGene00006716	WBGene00006585
WBGene00004743	WBGene00010075	WBGene00006720	WBGene00006586
WBGene00004744	WBGene00010077	WBGene00006721	WBGene00006587
WBGene00004748	WBGene00010083	WBGene00006722	WBGene00006588
WBGene00004749	WBGene00010089	WBGene00006723	WBGene00006589
WBGene00004752	WBGene00010094	WBGene00006724	WBGene00006590
WBGene00004753	WBGene00010097	WBGene00006725	WBGene00006594
WBGene00004754	WBGene00010111	WBGene00006726	WBGene00006595
WBGene00004755	WBGene00010115	WBGene00006727	WBGene00006596
WBGene00004756	WBGene00010130	WBGene00006728	WBGene00006597
WBGene00004758	WBGene00010131	WBGene00006729	WBGene00006598
WBGene00004759	WBGene00010139	WBGene00006730	WBGene00006599
WBGene00004760	WBGene00010160	WBGene00006733	WBGene00006600
WBGene00004762	WBGene00010166	WBGene00006734	WBGene00006601
WBGene00004766	WBGene00010178	WBGene00006735	WBGene00006605
WBGene00004767	WBGene00010182	WBGene00006738	WBGene00006606
WBGene00004768	WBGene00010197	WBGene00006742	WBGene00006607
WBGene00004769	WBGene00010214	WBGene00006743	WBGene00006608
WBGene00004771	WBGene00010232	WBGene00006744	WBGene00006609
WBGene00004773	WBGene00010233	WBGene00006745	WBGene00006611
WBGene00004774	WBGene00010260	WBGene00006746	WBGene00006612
WBGene00004775	WBGene00010272	WBGene00006748	WBGene00006613
WBGene00004776	WBGene00010279	WBGene00006750	WBGene00006614
WBGene00004778	WBGene00010282	WBGene00006751	WBGene00006615
WBGene00004779	WBGene00010283	WBGene00006752	WBGene00006617
WBGene00004780	WBGene00010284	WBGene00006754	WBGene00006619
WBGene00004781	WBGene00010286	WBGene00006755	WBGene00006620
WBGene00004782	WBGene00010296	WBGene00006757	WBGene00006626
WBGene00004786	WBGene00010303	WBGene00006761	WBGene00006633
WBGene00004787	WBGene00010304	WBGene00006762	WBGene00006634
WBGene00004788	WBGene00010308	WBGene00006763	WBGene00006635
WBGene00004789	WBGene00010317	WBGene00006764	WBGene00006638
WBGene00004790	WBGene00010325	WBGene00006766	WBGene00006647
WBGene00004793	WBGene00010326	WBGene00006767	WBGene00006648
WBGene00004795	WBGene00010333	WBGene00006768	WBGene00006649
WBGene00004798	WBGene00010336	WBGene00006770	WBGene00006652
WBGene00004800	WBGene00010369	WBGene00006771	WBGene00006654
WBGene00004801	WBGene00010370	WBGene00006772	WBGene00006655
WBGene00004802	WBGene00010386	WBGene00006773	WBGene00006669
WBGene00004803	WBGene00010397	WBGene00006774	WBGene00006680
WBGene00004806	WBGene00010405	WBGene00006776	WBGene00006696
WBGene00004807	WBGene00010406	WBGene00006778	WBGene00006697
WBGene00004808	WBGene00010408	WBGene00006779	WBGene00006698
WBGene00004809	WBGene00010419	WBGene00006780	WBGene00006699
WBGene00004810	WBGene00010423	WBGene00006781	WBGene00006700
WBGene00004811	WBGene00010428	WBGene00006783	WBGene00006701
WBGene00004812	WBGene00010435	WBGene00006785	WBGene00006702
WBGene00004813	WBGene00010436	WBGene00006786	WBGene00006703
WBGene00004814	WBGene00010437	WBGene00006787	WBGene00006704
WBGene00004815	WBGene00010444	WBGene00006788	WBGene00006705
WBGene00004816	WBGene00010450	WBGene00006789	WBGene00006706
WBGene00004818	WBGene00010459	WBGene00006790	WBGene00006707
WBGene00004819	WBGene00010478	WBGene00006791	WBGene00006708
WBGene00004820	WBGene00010480	WBGene00006792	WBGene00006709
WBGene00004821	WBGene00010481	WBGene00006793	WBGene00006711
WBGene00004822	WBGene00010484	WBGene00006794	WBGene00006712
WBGene00004823	WBGene00010485	WBGene00006795	WBGene00006713
WBGene00004825	WBGene00010488	WBGene00006796	WBGene00006714
[truncated: 4,802 more rows]

## Sheet: B) Results Distribution
Ensembl Uniques (1129)	HoGe Uniques (14)	InP Uniques (488)	OrthoMCL Uniques (232)		Ensembl/HoGe (115)	Ensembl/InP (233)	Ensembl/OrthoMCL (522)	HoGe/InP (2)	HoGe/OrthoMCL (27)	InP/OrthoMCL (208)		Ensembl/HoGe/InP (132)	Ensembl/HoGe/OrthoMCL (192)	Ensembl/InP/OrthoMCL (1224)	HoGe/InP/OrthoMCL (40)		All Programs (3254)
WBGene00000037	WBGene00001557	WBGene00000120	WBGene00000093		WBGene00000046	WBGene00000058	WBGene00000023	WBGene00009500	WBGene00000282	WBGene00000121		WBGene00000241	WBGene00000003	WBGene00000018	WBGene00000071		WBGene00000001
WBGene00000038	WBGene00002055	WBGene00000178	WBGene00000414		WBGene00000048	WBGene00000145	WBGene00000036	WBGene00010857	WBGene00001552	WBGene00000122		WBGene00000279	WBGene00000055	WBGene00000095	WBGene00000877		WBGene00000002
WBGene00000042	WBGene00002056	WBGene00000251	WBGene00000423		WBGene00000049	WBGene00000401	WBGene00000069		WBGene00001554	WBGene00000177		WBGene00000397	WBGene00000067	WBGene00000096	WBGene00000903		WBGene00000004
WBGene00000043	WBGene00002057	WBGene00000252	WBGene00000606		WBGene00000050	WBGene00000436	WBGene00000073		WBGene00001555	WBGene00000209		WBGene00000424	WBGene00000118	WBGene00000101	WBGene00000985		WBGene00000020
WBGene00000044	WBGene00002058	WBGene00000256	WBGene00000992		WBGene00000053	WBGene00000441	WBGene00000100		WBGene00001556	WBGene00000210		WBGene00000950	WBGene00000150	WBGene00000137	WBGene00001037		WBGene00000022
WBGene00000045	WBGene00002067	WBGene00000517	WBGene00001068		WBGene00000169	WBGene00000449	WBGene00000146		WBGene00001946	WBGene00000236		WBGene00000952	WBGene00000232	WBGene00000139	WBGene00001498		WBGene00000035
WBGene00000047	WBGene00003518	WBGene00000535	WBGene00001223		WBGene00000173	WBGene00000473	WBGene00000176		WBGene00002218	WBGene00000249		WBGene00000972	WBGene00000233	WBGene00000140	WBGene00001811		WBGene00000039
WBGene00000051	WBGene00008897	WBGene00000537	WBGene00001239		WBGene00000509	WBGene00000475	WBGene00000202		WBGene00004269	WBGene00000265		WBGene00000989	WBGene00000248	WBGene00000143	WBGene00001813		WBGene00000040
WBGene00000054	WBGene00012206	WBGene00000594	WBGene00001245		WBGene00001429	WBGene00000483	WBGene00000211		WBGene00006528	WBGene00000274		WBGene00001053	WBGene00000254	WBGene00000162	WBGene00002064		WBGene00000041
WBGene00000056	WBGene00017157	WBGene00000596	WBGene00001400		WBGene00001602	WBGene00000521	WBGene00000213		WBGene00006529	WBGene00000520		WBGene00001102	WBGene00000259	WBGene00000163	WBGene00002065		WBGene00000060
WBGene00000057	WBGene00017327	WBGene00000597	WBGene00001466		WBGene00001750	WBGene00000527	WBGene00000216		WBGene00006530	WBGene00000534		WBGene00001166	WBGene00000281	WBGene00000166	WBGene00002244		WBGene00000063
WBGene00000059	WBGene00018056	WBGene00000599	WBGene00001551		WBGene00001751	WBGene00000564	WBGene00000226		WBGene00006531	WBGene00000795		WBGene00001425	WBGene00000294	WBGene00000206	WBGene00002344		WBGene00000064
WBGene00000061	WBGene00020897	WBGene00000601	WBGene00001553		WBGene00001754	WBGene00000583	WBGene00000227		WBGene00006535	WBGene00000835		WBGene00002053	WBGene00000296	WBGene00000207	WBGene00003406		WBGene00000065
WBGene00000062	WBGene00044404	WBGene00000602	WBGene00001578		WBGene00001755	WBGene00000603	WBGene00000262		WBGene00006888	WBGene00000863		WBGene00002054	WBGene00000406	WBGene00000222	WBGene00003657		WBGene00000066
WBGene00000070		WBGene00000608	WBGene00001669		WBGene00001757	WBGene00000625	WBGene00000277		WBGene00007138	WBGene00000878		WBGene00002224	WBGene00000481	WBGene00000224	WBGene00004451		WBGene00000068
WBGene00000079		WBGene00000611	WBGene00001958		WBGene00001760	WBGene00000819	WBGene00000386		WBGene00007913	WBGene00000879		WBGene00002259	WBGene00000531	WBGene00000225	WBGene00005010		WBGene00000072
WBGene00000082		WBGene00000612	WBGene00001980		WBGene00001761	WBGene00000829	WBGene00000388		WBGene00010639	WBGene00000883		WBGene00002260	WBGene00000544	WBGene00000228	WBGene00006438		WBGene00000074
WBGene00000083		WBGene00000614	WBGene00001996		WBGene00001762	WBGene00001036	WBGene00000411		WBGene00011972	WBGene00000897		WBGene00003168	WBGene00000991	WBGene00000231	WBGene00006505		WBGene00000075
WBGene00000098		WBGene00000615	WBGene00002026		WBGene00001763	WBGene00001081	WBGene00000421		WBGene00014028	WBGene00000961		WBGene00003174	WBGene00001122	WBGene00000257	WBGene00006936		WBGene00000080
WBGene00000138		WBGene00000616	WBGene00003008		WBGene00001765	WBGene00001096	WBGene00000428		WBGene00015777	WBGene00001374		WBGene00003177	WBGene00001332	WBGene00000270	WBGene00007215		WBGene00000081
WBGene00000144		WBGene00000617	WBGene00003144		WBGene00001766	WBGene00001106	WBGene00000430		WBGene00016911	WBGene00001483		WBGene00003835	WBGene00001423	WBGene00000301	WBGene00007339		WBGene00000086
WBGene00000156		WBGene00000618	WBGene00003239		WBGene00001768	WBGene00001337	WBGene00000433		WBGene00017389	WBGene00001681		WBGene00003920	WBGene00001428	WBGene00000366	WBGene00007664		WBGene00000089
WBGene00000190		WBGene00000620	WBGene00003495		WBGene00001770	WBGene00001432	WBGene00000448		WBGene00017464	WBGene00001829		WBGene00003986	WBGene00001430	WBGene00000367	WBGene00010419		WBGene00000090
WBGene00000196		WBGene00000622	WBGene00003568		WBGene00001772	WBGene00001438	WBGene00000453		WBGene00018513	WBGene00001830		WBGene00004284	WBGene00001487	WBGene00000371	WBGene00010856		WBGene00000092
WBGene00000214		WBGene00000626	WBGene00003793		WBGene00001774	WBGene00001490	WBGene00000458		WBGene00020682	WBGene00001853		WBGene00004382	WBGene00001488	WBGene00000382	WBGene00010858		WBGene00000097
WBGene00000215		WBGene00000627	WBGene00003802		WBGene00001775	WBGene00001773	WBGene00000468		WBGene00020931	WBGene00001854		WBGene00005642	WBGene00001513	WBGene00000387	WBGene00011615		WBGene00000099
WBGene00000218		WBGene00000631	WBGene00003850		WBGene00001778	WBGene00001824	WBGene00000469		WBGene00021597	WBGene00001855		WBGene00005644	WBGene00001591	WBGene00000391	WBGene00011630		WBGene00000102
WBGene00000219		WBGene00000634	WBGene00003989		WBGene00001779	WBGene00001914	WBGene00000472			WBGene00001856		WBGene00005649	WBGene00001592	WBGene00000392	WBGene00012179		WBGene00000103
WBGene00000220		WBGene00000636	WBGene00003991		WBGene00001781	WBGene00002012	WBGene00000474			WBGene00001857		WBGene00006774	WBGene00001593	WBGene00000393	WBGene00012342		WBGene00000105
WBGene00000238		WBGene00000637	WBGene00003997		WBGene00001782	WBGene00002013	WBGene00000528			WBGene00001862		WBGene00006779	WBGene00001614	WBGene00000413	WBGene00013748		WBGene00000106
WBGene00000239		WBGene00000638	WBGene00003998		WBGene00001783	WBGene00002023	WBGene00000529			WBGene00001898		WBGene00006832	WBGene00001615	WBGene00000417	WBGene00016655		WBGene00000107
WBGene00000275		WBGene00000639	WBGene00003999		WBGene00001784	WBGene00002027	WBGene00000770			WBGene00001950		WBGene00006910	WBGene00001616	WBGene00000429	WBGene00016879		WBGene00000108
WBGene00000389		WBGene00000640	WBGene00004000		WBGene00001785	WBGene00002030	WBGene00000771			WBGene00001975		WBGene00007347	WBGene00001623	WBGene00000431	WBGene00017268		WBGene00000109
WBGene00000395		WBGene00000641	WBGene00004001		WBGene00001787	WBGene00002225	WBGene00000772			WBGene00002180		WBGene00007363	WBGene00001647	WBGene00000435	WBGene00019299		WBGene00000110
WBGene00000399		WBGene00000644	WBGene00004002		WBGene00002195	WBGene00002226	WBGene00000777			WBGene00002583		WBGene00007364	WBGene00001678	WBGene00000437	WBGene00019846		WBGene00000111
WBGene00000402		WBGene00000645	WBGene00004005		WBGene00003369	WBGene00002266	WBGene00000780			WBGene00002990		WBGene00007384	WBGene00001752	WBGene00000438	WBGene00020373		WBGene00000112
WBGene00000412		WBGene00000647	WBGene00004006		WBGene00003370	WBGene00002267	WBGene00000782			WBGene00003066		WBGene00007436	WBGene00001753	WBGene00000439	WBGene00021461		WBGene00000113
WBGene00000432		WBGene00000648	WBGene00004007		WBGene00003588	WBGene00002268	WBGene00000784			WBGene00003374		WBGene00007880	WBGene00001756	WBGene00000445	WBGene00021596		WBGene00000114
WBGene00000440		WBGene00000649	WBGene00004008		WBGene00003807	WBGene00002275	WBGene00000803			WBGene00003384		WBGene00007954	WBGene00001764	WBGene00000447	WBGene00021752		WBGene00000115
WBGene00000442		WBGene00000650	WBGene00004017		WBGene00003808	WBGene00002976	WBGene00000839			WBGene00003391		WBGene00008093	WBGene00001767	WBGene00000451	WBGene00022162		WBGene00000116
WBGene00000446		WBGene00000651	WBGene00004083		WBGene00003941	WBGene00003388	WBGene00000841			WBGene00003532		WBGene00008519	WBGene00001769	WBGene00000452			WBGene00000117
WBGene00000450		WBGene00000653	WBGene00004104		WBGene00006475	WBGene00003509	WBGene00000868			WBGene00004024		WBGene00008598	WBGene00001776	WBGene00000454			WBGene00000123
WBGene00000457		WBGene00000654	WBGene00004189		WBGene00006486	WBGene00003675	WBGene00000894			WBGene00004143		WBGene00008678	WBGene00001777	WBGene00000463			WBGene00000142
WBGene00000461		WBGene00000655	WBGene00004244		WBGene00007067	WBGene00003773	WBGene00000895			WBGene00004196		WBGene00008793	WBGene00001780	WBGene00000464			WBGene00000147
WBGene00000477		WBGene00000656	WBGene00004264		WBGene00007080	WBGene00003838	WBGene00000912			WBGene00004199		WBGene00008808	WBGene00001786	WBGene00000476			WBGene00000148
WBGene00000511		WBGene00000657	WBGene00004309		WBGene00007584	WBGene00003839	WBGene00000913			WBGene00004245		WBGene00009221	WBGene00001812	WBGene00000491			WBGene00000149
WBGene00000512		WBGene00000659	WBGene00004922		WBGene00007825	WBGene00003840	WBGene00000935			WBGene00004442		WBGene00009316	WBGene00001817	WBGene00000493			WBGene00000155
WBGene00000513		WBGene00000660	WBGene00004996		WBGene00008137	WBGene00003851	WBGene00000968			WBGene00004448		WBGene00009455	WBGene00001818	WBGene00000507			WBGene00000157
WBGene00000514		WBGene00000661	WBGene00005226		WBGene00008499	WBGene00003864	WBGene00001061			WBGene00004777		WBGene00009735	WBGene00001836	WBGene00000508			WBGene00000158
WBGene00000548		WBGene00000663	WBGene00005895		WBGene00008599	WBGene00003865	WBGene00001086			WBGene00004918		WBGene00009773	WBGene00002149	WBGene00000552			WBGene00000159
WBGene00000674		WBGene00000664	WBGene00006452		WBGene00008746	WBGene00003915	WBGene00001088			WBGene00004952		WBGene00010077	WBGene00002198	WBGene00000553			WBGene00000160
WBGene00000750		WBGene00000665	WBGene00006532		WBGene00008905	WBGene00004053	WBGene00001116			WBGene00004995		WBGene00010606	WBGene00003171	WBGene00000584			WBGene00000161
WBGene00000779		WBGene00000666	WBGene00006533		WBGene00009513	WBGene00004778	WBGene00001145			WBGene00006562		WBGene00010762	WBGene00003390	WBGene00000708			WBGene00000164
WBGene00000781		WBGene00000667	WBGene00006587		WBGene00009876	WBGene00004858	WBGene00001156			WBGene00006565		WBGene00010959	WBGene00003409	WBGene00000774			WBGene00000165
WBGene00000783		WBGene00000668	WBGene00006588		WBGene00010182	WBGene00005006	WBGene00001178			WBGene00006584		WBGene00010963	WBGene00003410	WBGene00000785			WBGene00000170
WBGene00000789		WBGene00000669	WBGene00006589		WBGene00010282	WBGene00006055	WBGene00001204			WBGene00006585		WBGene00010964	WBGene00003412	WBGene00000786			WBGene00000171
WBGene00000797		WBGene00000670	WBGene00006605		WBGene00010663	WBGene00006380	WBGene00001210			WBGene00006586		WBGene00010965	WBGene00003413	WBGene00000792			WBGene00000172
WBGene00000820		WBGene00000671	WBGene00006649		WBGene00010834	WBGene00006384	WBGene00001242			WBGene00006764		WBGene00011009	WBGene00003566	WBGene00000793			WBGene00000174
WBGene00000821		WBGene00000675	WBGene00006922		WBGene00011262	WBGene00006394	WBGene00001439			WBGene00006794		WBGene00011094	WBGene00003570	WBGene00000796			WBGene00000175
WBGene00000885		WBGene00000676	WBGene00006924		WBGene00011495	WBGene00006436	WBGene00001479			WBGene00006875		WBGene00011235	WBGene00003571	WBGene00000813			WBGene00000180
WBGene00000899		WBGene00000678	WBGene00006957		WBGene00011644	WBGene00006466	WBGene00001484			WBGene00006997		WBGene00011416	WBGene00003581	WBGene00000814			WBGene00000181
WBGene00000902		WBGene00000679	WBGene00007228		WBGene00011829	WBGene00006545	WBGene00001486			WBGene00007015		WBGene00011419	WBGene00003828	WBGene00000815			WBGene00000182
WBGene00000904		WBGene00000680	WBGene00007248		WBGene00011879	WBGene00006546	WBGene00001491			WBGene00007104		WBGene00011673	WBGene00003878	WBGene00000816			WBGene00000183
WBGene00000910		WBGene00000681	WBGene00007254		WBGene00011926	WBGene00006547	WBGene00001493			WBGene00007146		WBGene00011676	WBGene00004091	WBGene00000854			WBGene00000184
WBGene00000951		WBGene00000682	WBGene00007282		WBGene00011929	WBGene00006616	WBGene00001538			WBGene00007268		WBGene00012170	WBGene00004209	WBGene00000865			WBGene00000187
WBGene00000955		WBGene00000685	WBGene00007284		WBGene00012116	WBGene00006662	WBGene00001560			WBGene00007443		WBGene00012280	WBGene00004211	WBGene00000866			WBGene00000188
WBGene00000965		WBGene00000687	WBGene00007385		WBGene00012137	WBGene00006671	WBGene00001568			WBGene00007476		WBGene00012315	WBGene00004316	WBGene00000867			WBGene00000189
WBGene00000969		WBGene00000690	WBGene00007448		WBGene00012168	WBGene00006778	WBGene00001574			WBGene00007995		WBGene00012376	WBGene00004359	WBGene00000870			WBGene00000192
WBGene00000980		WBGene00000691	WBGene00007493		WBGene00012207	WBGene00006792	WBGene00001596			WBGene00008224		WBGene00012811	WBGene00004360	WBGene00000871			WBGene00000193
WBGene00000987		WBGene00000692	WBGene00007533		WBGene00012222	WBGene00006845	WBGene00001609			WBGene00008375		WBGene00013131	WBGene00004499	WBGene00000872			WBGene00000195
WBGene00000990		WBGene00000693	WBGene00007684		WBGene00012259	WBGene00006852	WBGene00001622			WBGene00008429		WBGene00013578	WBGene00004776	WBGene00000875			WBGene00000197
WBGene00001023		WBGene00000694	WBGene00007710		WBGene00012293	WBGene00006869	WBGene00001624			WBGene00008459		WBGene00013587	WBGene00004779	WBGene00000876			WBGene00000198
WBGene00001034		WBGene00000696	WBGene00007760		WBGene00012402	WBGene00006874	WBGene00001630			WBGene00008768		WBGene00013835	WBGene00004780	WBGene00000884			WBGene00000199
WBGene00001044		WBGene00000697	WBGene00008034		WBGene00012416	WBGene00006894	WBGene00001666			WBGene00008996		WBGene00013926	WBGene00004892	WBGene00000900			WBGene00000200
WBGene00001057		WBGene00000698	WBGene00008263		WBGene00013187	WBGene00006896	WBGene00001795			WBGene00009032		WBGene00013996	WBGene00004915	WBGene00000911			WBGene00000201
WBGene00001059		WBGene00000699	WBGene00008346		WBGene00014241	WBGene00006897	WBGene00001796			WBGene00009112		WBGene00014200	WBGene00006402	WBGene00000929			WBGene00000203
WBGene00001133		WBGene00000700	WBGene00008444		WBGene00014989	WBGene00006938	WBGene00001833			WBGene00009128		WBGene00014220	WBGene00006418	WBGene00000931			WBGene00000204
WBGene00001157		WBGene00000701	WBGene00008669		WBGene00015389	WBGene00007062	WBGene00001851			WBGene00009236		WBGene00015162	WBGene00006424	WBGene00000938			WBGene00000205
WBGene00001158		WBGene00000703	WBGene00008690		WBGene00015889	WBGene00007089	WBGene00001865			WBGene00009256		WBGene00015437	WBGene00006517	WBGene00000941			WBGene00000208
WBGene00001162		WBGene00000704	WBGene00008785		WBGene00016059	WBGene00007190	WBGene00001943			WBGene00009505		WBGene00015709	WBGene00006536	WBGene00000942			WBGene00000212
WBGene00001164		WBGene00000705	WBGene00008934		WBGene00016093	WBGene00007203	WBGene00001948			WBGene00009556		WBGene00015975	WBGene00006537	WBGene00000994			WBGene00000217
WBGene00001182		WBGene00000706	WBGene00008980		WBGene00016094	WBGene00007204	WBGene00001949			WBGene00009632		WBGene00016092	WBGene00006577	WBGene00001002			WBGene00000229
WBGene00001186		WBGene00000707	WBGene00008992		WBGene00016095	WBGene00007261	WBGene00001961			WBGene00009636		WBGene00016283	WBGene00006600	WBGene00001008			WBGene00000230
WBGene00001190		WBGene00000710	WBGene00009106		WBGene00016110	WBGene00007357	WBGene00001994			WBGene00009739		WBGene00016489	WBGene00006607	WBGene00001017			WBGene00000235
WBGene00001237		WBGene00000711	WBGene00009127		WBGene00016335	WBGene00007404	WBGene00002015			WBGene00009881		WBGene00016747	WBGene00006614	WBGene00001022			WBGene00000240
WBGene00001247		WBGene00000713	WBGene00009132		WBGene00016340	WBGene00007565	WBGene00002016			WBGene00009940		WBGene00017179	WBGene00006756	WBGene00001028			WBGene00000242
WBGene00001250		WBGene00000714	WBGene00009165		WBGene00016350	WBGene00007772	WBGene00002017			WBGene00010159		WBGene00017184	WBGene00006760	WBGene00001032			WBGene00000244
WBGene00001252		WBGene00000715	WBGene00009219		WBGene00016354	WBGene00007776	WBGene00002176			WBGene00010306		WBGene00017971	WBGene00006964	WBGene00001040			WBGene00000246
WBGene00001253		WBGene00000716	WBGene00009257		WBGene00016435	WBGene00007808	WBGene00002299			WBGene00010403		WBGene00018283	WBGene00007591	WBGene00001049			WBGene00000247
WBGene00001373		WBGene00000717	WBGene00009364		WBGene00016664	WBGene00007944	WBGene00002601			WBGene00010439		WBGene00018656	WBGene00007711	WBGene00001080			WBGene00000253
WBGene00001401		WBGene00000718	WBGene00009576		WBGene00017861	WBGene00008027	WBGene00002999			WBGene00010458		WBGene00018853	WBGene00007774	WBGene00001087			WBGene00000266
WBGene00001402		WBGene00000719	WBGene00009673		WBGene00017950	WBGene00008028	WBGene00003001			WBGene00010505		WBGene00018901	WBGene00007963	WBGene00001121			WBGene00000269
WBGene00001424		WBGene00000720	WBGene00009678		WBGene00018067	WBGene00008029	WBGene00003034			WBGene00010677		WBGene00019108	WBGene00007964	WBGene00001127			WBGene00000271
WBGene00001433		WBGene00000721	WBGene00009740		WBGene00018696	WBGene00008030	WBGene00003037			WBGene00010904		WBGene00019109	WBGene00007967	WBGene00001131			WBGene00000276
WBGene00001440		WBGene00000722	WBGene00009880		WBGene00018706	WBGene00008123	WBGene00003040			WBGene00010922		WBGene00019225	WBGene00008122	WBGene00001132			WBGene00000280
WBGene00001441		WBGene00000723	WBGene00009888		WBGene00018885	WBGene00008166	WBGene00003058			WBGene00011017		WBGene00019364	WBGene00008238	WBGene00001161			WBGene00000283
WBGene00001465		WBGene00000724	WBGene00009980		WBGene00018963	WBGene00008404	WBGene00003072			WBGene00011045		WBGene00019376	WBGene00008316	WBGene00001163			WBGene00000289
WBGene00001481		WBGene00000725	WBGene00010109		WBGene00019438	WBGene00008604	WBGene00003106			WBGene00011308		WBGene00019609	WBGene00008441	WBGene00001168			WBGene00000292
WBGene00001494		WBGene00000726	WBGene00010192		WBGene00019692	WBGene00008625	WBGene00003133			WBGene00011311		WBGene00019979	WBGene00008458	WBGene00001169			WBGene00000293
WBGene00001511		WBGene00000727	WBGene00010302		WBGene00019717	WBGene00008990	WBGene00003151			WBGene00011340		WBGene00020283	WBGene00008504	WBGene00001171			WBGene00000295
WBGene00001517		WBGene00000728	WBGene00010345		WBGene00020256	WBGene00009485	WBGene00003163			WBGene00011392		WBGene00020295	WBGene00008510	WBGene00001194			WBGene00000298
WBGene00001518		WBGene00000729	WBGene00010456		WBGene00020506	WBGene00009492	WBGene00003165			WBGene00011411		WBGene00020516	WBGene00008521	WBGene00001207			WBGene00000368
WBGene00001565		WBGene00000730	WBGene00010569		WBGene00020659	WBGene00009579	WBGene00003166			WBGene00011528		WBGene00020875	WBGene00008684	WBGene00001215			WBGene00000369
WBGene00001586		WBGene00000731	WBGene00010616		WBGene00020689	WBGene00009663	WBGene00003178			WBGene00011941		WBGene00020888	WBGene00009226	WBGene00001225			WBGene00000372
WBGene00001587		WBGene00000732	WBGene00010619		WBGene00020914	WBGene00009852	WBGene00003222			WBGene00012029		WBGene00020889	WBGene00009271	WBGene00001235			WBGene00000373
WBGene00001588		WBGene00000733	WBGene00010638		WBGene00020936	WBGene00009890	WBGene00003229			WBGene00012182		WBGene00021213	WBGene00009326	WBGene00001249			WBGene00000375
WBGene00001594		WBGene00000734	WBGene00010783		WBGene00021152	WBGene00009891	WBGene00003414			WBGene00012198		WBGene00021215	WBGene00009435	WBGene00001281			WBGene00000376
WBGene00001595		WBGene00000735	WBGene00010812		WBGene00021537	WBGene00009895	WBGene00003482			WBGene00012466		WBGene00021535	WBGene00009475	WBGene00001320			WBGene00000377
WBGene00001603		WBGene00000737	WBGene00010993		WBGene00022181	WBGene00009896	WBGene00003497			WBGene00012468		WBGene00021555	WBGene00009801	WBGene00001329			WBGene00000378
WBGene00001606		WBGene00000738	WBGene00011016		WBGene00022499	WBGene00010012	WBGene00003511			WBGene00012483		WBGene00021645	WBGene00009865	WBGene00001365			WBGene00000379
WBGene00001607		WBGene00000739	WBGene00011130		WBGene00022532	WBGene00010510	WBGene00003559			WBGene00012696		WBGene00021661	WBGene00010115	WBGene00001371			WBGene00000380
WBGene00001617		WBGene00000740	WBGene00011143		WBGene00022780	WBGene00010554	WBGene00003578			WBGene00012712		WBGene00021796	WBGene00010139	WBGene00001372			WBGene00000381
WBGene00001618		WBGene00000741	WBGene00011155		WBGene00043066	WBGene00010867	WBGene00003582			WBGene00012807		WBGene00021818	WBGene00010304	WBGene00001397			WBGene00000383
WBGene00001619		WBGene00000742	WBGene00011156		WBGene00044121	WBGene00010962	WBGene00003592			WBGene00012908		WBGene00022377	WBGene00010609	WBGene00001398			WBGene00000390
WBGene00001621		WBGene00000743	WBGene00011173		WBGene00044794	WBGene00010967	WBGene00003595			WBGene00013000		WBGene00022646	WBGene00010915	WBGene00001399			WBGene00000396
WBGene00001625		WBGene00000744	WBGene00011193			WBGene00011052	WBGene00003639			WBGene00013004		WBGene00022738	WBGene00011123	WBGene00001410			WBGene00000403
WBGene00001633		WBGene00000745	WBGene00011205			WBGene00011054	WBGene00003659			WBGene00013041		WBGene00022744	WBGene00011433	WBGene00001412			WBGene00000405
WBGene00001637		WBGene00000746	WBGene00011230			WBGene00011181	WBGene00003729			WBGene00013094		WBGene00022787	WBGene00011580	WBGene00001427			WBGene00000407
WBGene00001788		WBGene00000747	WBGene00011273			WBGene00011218	WBGene00003730			WBGene00013109		WBGene00022789	WBGene00011732	WBGene00001434			WBGene00000408
WBGene00001789		WBGene00000748	WBGene00011330			WBGene00011258	WBGene00003734			WBGene00013177		WBGene00022815	WBGene00011887	WBGene00001470			WBGene00000409
WBGene00001820		WBGene00000749	WBGene00011522			WBGene00011333	WBGene00003777			WBGene00013207		WBGene00043097	WBGene00012002	WBGene00001489			WBGene00000410
WBGene00001828		WBGene00000751	WBGene00011635			WBGene00011441	WBGene00003795			WBGene00013422		WBGene00043705	WBGene00012073	WBGene00001492			WBGene00000415
WBGene00001831		WBGene00000752	WBGene00011730			WBGene00011454	WBGene00003805			WBGene00013725		WBGene00044697	WBGene00012184	WBGene00001496			WBGene00000416
WBGene00001835		WBGene00000753	WBGene00011794			WBGene00011486	WBGene00003909			WBGene00013892		WBGene00044736	WBGene00012423	WBGene00001500			WBGene00000419
WBGene00001838		WBGene00000754	WBGene00011859			WBGene00011501	WBGene00003912			WBGene00014170		WBGene00044903	WBGene00012730	WBGene00001501			WBGene00000420
WBGene00001913		WBGene00000755	WBGene00011866			WBGene00011724	WBGene00003937			WBGene00014226		WBGene00045338	WBGene00012914	WBGene00001505			WBGene00000422
WBGene00001944		WBGene00000757	WBGene00011883			WBGene00011776	WBGene00003938			WBGene00015008		WBGene00077643	WBGene00012928	WBGene00001507			WBGene00000426
WBGene00001957		WBGene00000759	WBGene00011953			WBGene00011806	WBGene00003939			WBGene00015025		WBGene00077701	WBGene00012980	WBGene00001516			WBGene00000443
WBGene00001960		WBGene00000775	WBGene00012013			WBGene00011807	WBGene00003943			WBGene00015035		WBGene00194707	WBGene00013002	WBGene00001559			WBGene00000466
WBGene00001971		WBGene00000908	WBGene00012150			WBGene00011868	WBGene00003956			WBGene00015062		WBGene00194934	WBGene00013132	WBGene00001604			WBGene00000478
WBGene00001985		WBGene00000977	WBGene00012437			WBGene00011906	WBGene00003957			WBGene00015248		WBGene00219274	WBGene00013160	WBGene00001682			WBGene00000479
WBGene00002018		WBGene00000978	WBGene00012549			WBGene00011918	WBGene00003958			WBGene00015327		WBGene00219316	WBGene00013312	WBGene00001707			WBGene00000480
WBGene00002019		WBGene00000986	WBGene00012560			WBGene00011966	WBGene00003959			WBGene00015454			WBGene00013497	WBGene00001749			WBGene00000482
WBGene00002020		WBGene00001043	WBGene00012738			WBGene00012010	WBGene00003982			WBGene00015487			WBGene00013711	WBGene00001771			WBGene00000484
WBGene00002021		WBGene00001064	WBGene00012889			WBGene00012016	WBGene00003996			WBGene00015513			WBGene00013732	WBGene00001837			WBGene00000485
WBGene00002024		WBGene00001065	WBGene00012977			WBGene00012162	WBGene00004011			WBGene00015693			WBGene00013739	WBGene00001875			WBGene00000490
WBGene00002037		WBGene00001066	WBGene00013161			WBGene00012172	WBGene00004013			WBGene00015746			WBGene00013914	WBGene00001884			WBGene00000492
WBGene00002059		WBGene00001067	WBGene00013231			WBGene00012251	WBGene00004044			WBGene00015776			WBGene00014001	WBGene00001900			WBGene00000498
WBGene00002060		WBGene00001069	WBGene00013353			WBGene00012253	WBGene00004048			WBGene00015815			WBGene00014058	WBGene00001902			WBGene00000499
WBGene00002063		WBGene00001074	WBGene00013603			WBGene00012467	WBGene00004051			WBGene00016002			WBGene00014139	WBGene00001911			WBGene00000500
WBGene00002072		WBGene00001075	WBGene00013604			WBGene00012531	WBGene00004052			WBGene00016057			WBGene00014148	WBGene00001924			WBGene00000501
WBGene00002073		WBGene00001076	WBGene00013672			WBGene00012693	WBGene00004086			WBGene00016118			WBGene00014232	WBGene00001952			WBGene00000502
WBGene00002151		WBGene00001324	WBGene00013807			WBGene00012994	WBGene00004095			WBGene00016173			WBGene00014697	WBGene00001953			WBGene00000503
WBGene00002174		WBGene00001583	WBGene00013866			WBGene00013028	WBGene00004135			WBGene00016790			WBGene00015135	WBGene00001955			WBGene00000506
WBGene00002177		WBGene00001758	WBGene00014300			WBGene00013106	WBGene00004214			WBGene00016937			WBGene00015273	WBGene00001959			WBGene00000510
WBGene00002186		WBGene00001954	WBGene00014938			WBGene00013290	WBGene00004303			WBGene00017159			WBGene00015887	WBGene00001995			WBGene00000515
WBGene00002193		WBGene00002032	WBGene00015049			WBGene00013381	WBGene00004306			WBGene00017269			WBGene00016147	WBGene00001997			WBGene00000518
WBGene00002194		WBGene00002033	WBGene00015251			WBGene00013703	WBGene00004312			WBGene00017289			WBGene00016328	WBGene00001998			WBGene00000519
WBGene00002199		WBGene00002242	WBGene00015307			WBGene00013877	WBGene00004350			WBGene00017357			WBGene00016589	WBGene00001999			WBGene00000530
WBGene00002200		WBGene00002263	WBGene00015338			WBGene00013958	WBGene00004401			WBGene00017723			WBGene00016652	WBGene00002000			WBGene00000532
WBGene00002204		WBGene00002269	WBGene00015406			WBGene00013970	WBGene00004410			WBGene00017738			WBGene00016739	WBGene00002002			WBGene00000533
WBGene00002205		WBGene00002270	WBGene00015471			WBGene00015050	WBGene00004443			WBGene00017852			WBGene00016907	WBGene00002004			WBGene00000536
WBGene00002206		WBGene00002271	WBGene00015660			WBGene00015112	WBGene00004737			WBGene00017909			WBGene00017166	WBGene00002011			WBGene00000539
WBGene00002208		WBGene00002272	WBGene00015965			WBGene00015113	WBGene00004786			WBGene00017936			WBGene00017733	WBGene00002029			WBGene00000540
WBGene00002210		WBGene00002273	WBGene00016247			WBGene00015564	WBGene00004857			WBGene00017954			WBGene00017771	WBGene00002040			WBGene00000541
WBGene00002211		WBGene00003035	WBGene00016348			WBGene00015592	WBGene00004898			WBGene00018017			WBGene00017775	WBGene00002046			WBGene00000542
WBGene00002214		WBGene00003057	WBGene00016397			WBGene00015807	WBGene00004905			WBGene00018074			WBGene00017921	WBGene00002047			WBGene00000543
WBGene00002234		WBGene00003124	WBGene00016412			WBGene00015914	WBGene00004923			WBGene00018206			WBGene00017996	WBGene00002048			WBGene00000545
WBGene00002240		WBGene00003160	WBGene00016413			WBGene00016060	WBGene00004924			WBGene00018239			WBGene00018370	WBGene00002066			WBGene00000546
WBGene00002250		WBGene00003210	WBGene00016427			WBGene00016393	WBGene00004933			WBGene00018405			WBGene00018373	WBGene00002069			WBGene00000547
WBGene00002265		WBGene00003218	WBGene00016443			WBGene00016545	WBGene00004949			WBGene00018527			WBGene00018491	WBGene00002079			WBGene00000549
WBGene00002282		WBGene00003258	WBGene00016504			WBGene00016546	WBGene00005013			WBGene00018762			WBGene00018739	WBGene00002175			WBGene00000550
WBGene00002783		WBGene00003523	WBGene00016558			WBGene00016547	WBGene00005024			WBGene00018897			WBGene00018755	WBGene00002179			WBGene00000554
WBGene00002881		WBGene00003526	WBGene00016721			WBGene00016549	WBGene00005153			WBGene00019087			WBGene00018996	WBGene00002192			WBGene00000561
WBGene00002915		WBGene00003527	WBGene00016728			WBGene00016550	WBGene00006063			WBGene00019277			WBGene00019237	WBGene00002207			WBGene00000565
WBGene00002974		WBGene00003607	WBGene00016764			WBGene00016987	WBGene00006331			WBGene00019284			WBGene00019301	WBGene00002216			WBGene00000566
WBGene00002975		WBGene00003779	WBGene00016845			WBGene00017039	WBGene00006363			WBGene00019478			WBGene00019395	WBGene00002227			WBGene00000567
WBGene00003006		WBGene00004249	WBGene00016991			WBGene00017183	WBGene00006390			WBGene00019606			WBGene00019636	WBGene00002228			WBGene00000585
WBGene00003015		WBGene00004300	WBGene00016996			WBGene00017419	WBGene00006391			WBGene00019667			WBGene00019693	WBGene00002239			WBGene00000591
WBGene00003029		WBGene00004363	WBGene00017135			WBGene00017482	WBGene00006392			WBGene00019730			WBGene00019875	WBGene00002252			WBGene00000761
WBGene00003055		WBGene00004397	WBGene00017140			WBGene00017532	WBGene00006396			WBGene00019800			WBGene00020114	WBGene00002264			WBGene00000762
WBGene00003075		WBGene00004398	WBGene00017219			WBGene00017705	WBGene00006431			WBGene00019808			WBGene00020230	WBGene00002276			WBGene00000763
WBGene00003100		WBGene00004804	WBGene00017262			WBGene00017707	WBGene00006476			WBGene00019831			WBGene00020262	WBGene00002295			WBGene00000764
WBGene00003111		WBGene00004824	WBGene00017285			WBGene00017735	WBGene00006487			WBGene00019937			WBGene00020321	WBGene00002297			WBGene00000765
WBGene00003169		WBGene00004963	WBGene00017360			WBGene00017760	WBGene00006504			WBGene00019940			WBGene00020426	WBGene00002696			WBGene00000766
WBGene00003170		WBGene00004993	WBGene00017369			WBGene00017886	WBGene00006534			WBGene00020018			WBGene00020770	WBGene00002717			WBGene00000767
WBGene00003173		WBGene00005009	WBGene00017437			WBGene00017945	WBGene00006571			WBGene00020037			WBGene00020955	WBGene00002804			WBGene00000768
WBGene00003209		WBGene00005016	WBGene00017513			WBGene00018006	WBGene00006608			WBGene00020094			WBGene00021167	WBGene00002850			WBGene00000773
WBGene00003238		WBGene00005017	WBGene00017676			WBGene00018061	WBGene00006635			WBGene00020181			WBGene00021227	WBGene00002957			WBGene00000776
WBGene00003241		WBGene00006459	WBGene00017800			WBGene00018214	WBGene00006680			WBGene00020246			WBGene00021486	WBGene00002979			WBGene00000778
WBGene00003371		WBGene00006580	WBGene00017916			WBGene00018354	WBGene00006712			WBGene00020299			WBGene00021741	WBGene00002982			WBGene00000787
WBGene00003380		WBGene00006624	WBGene00017982			WBGene00018547	WBGene00006718			WBGene00020322			WBGene00022021	WBGene00002986			WBGene00000788
WBGene00003385		WBGene00006625	WBGene00018046			WBGene00018566	WBGene00006736			WBGene00020625			WBGene00022148	WBGene00002987			WBGene00000794
WBGene00003386		WBGene00006978	WBGene00018051			WBGene00018568	WBGene00006759			WBGene00020823			WBGene00022201	WBGene00003000			WBGene00000798
WBGene00003395		WBGene00006982	WBGene00018301			WBGene00018900	WBGene00006777			WBGene00020901			WBGene00022389	WBGene00003014			WBGene00000799
WBGene00003402		WBGene00007016	WBGene00018350			WBGene00019096	WBGene00006802			WBGene00021093			WBGene00022519	WBGene00003017			WBGene00000800
WBGene00003533		WBGene00007072	WBGene00018361			WBGene00019178	WBGene00006804			WBGene00021208			WBGene00022721	WBGene00003018			WBGene00000802
WBGene00003535		WBGene00007073	WBGene00018518			WBGene00019179	WBGene00006814			WBGene00021348			WBGene00022759	WBGene00003024			WBGene00000812
WBGene00003536		WBGene00007245	WBGene00018593			WBGene00019612	WBGene00006816			WBGene00021421			WBGene00022852	WBGene00003033			WBGene00000817
WBGene00003537		WBGene00007349	WBGene00018783			WBGene00019773	WBGene00006820			WBGene00021638			WBGene00022853	WBGene00003043			WBGene00000818
WBGene00003538		WBGene00007369	WBGene00018867			WBGene00019782	WBGene00006844			WBGene00021647			WBGene00044144	WBGene00003060			WBGene00000822
WBGene00003539		WBGene00007422	WBGene00019055			WBGene00019980	WBGene00006914			WBGene00021689			WBGene00044631	WBGene00003062			WBGene00000830
WBGene00003540		WBGene00007455	WBGene00019146			WBGene00020003	WBGene00006915			WBGene00021709				WBGene00003068			WBGene00000831
WBGene00003541		WBGene00007587	WBGene00019272			WBGene00020070	WBGene00006916			WBGene00021785				WBGene00003078			WBGene00000832
WBGene00003542		WBGene00007592	WBGene00019273			WBGene00020179	WBGene00006940			WBGene00021813				WBGene00003084			WBGene00000833
WBGene00003543		WBGene00007650	WBGene00019274			WBGene00020208	WBGene00006961			WBGene00021931				WBGene00003085			WBGene00000834
WBGene00003544		WBGene00007670	WBGene00019407			WBGene00020258	WBGene00007012			WBGene00022043				WBGene00003089			WBGene00000836
WBGene00003545		WBGene00007702	WBGene00019510			WBGene00020289	WBGene00007047			WBGene00022180				WBGene00003102			WBGene00000837
WBGene00003546		WBGene00007709	WBGene00019677			WBGene00020307	WBGene00007140			WBGene00022500				WBGene00003107			WBGene00000838
WBGene00003547		WBGene00007740	WBGene00019767			WBGene00020498	WBGene00007186			WBGene00022663				WBGene00003130			WBGene00000840
WBGene00003548		WBGene00007862	WBGene00019869			WBGene00020646	WBGene00007223			WBGene00022733				WBGene00003132			WBGene00000843
WBGene00003549		WBGene00007885	WBGene00019884			WBGene00020694	WBGene00007258			WBGene00022783				WBGene00003134			WBGene00000846
WBGene00003550		WBGene00007914	WBGene00019920			WBGene00021131	WBGene00007303			WBGene00022835				WBGene00003142			WBGene00000857
WBGene00003551		WBGene00007946	WBGene00020089			WBGene00021209	WBGene00007398			WBGene00022851				WBGene00003149			WBGene00000858
WBGene00003552		WBGene00007966	WBGene00020300			WBGene00021249	WBGene00007545			WBGene00044201				WBGene00003155			WBGene00000869
WBGene00003553		WBGene00007994	WBGene00020380			WBGene00021304	WBGene00007643			WBGene00044236				WBGene00003158			WBGene00000874
WBGene00003554		WBGene00008097	WBGene00020810			WBGene00021457	WBGene00007668			WBGene00044423				WBGene00003172			WBGene00000880
WBGene00003562		WBGene00008222	WBGene00021021			WBGene00021780	WBGene00007680			WBGene00045433				WBGene00003182			WBGene00000881
WBGene00003564		WBGene00008247	WBGene00021022			WBGene00021798	WBGene00007849							WBGene00003183			WBGene00000882
WBGene00003590		WBGene00008248	WBGene00021548			WBGene00021846	WBGene00007859							WBGene00003196			WBGene00000886
WBGene00003593		WBGene00008249	WBGene00021640			WBGene00021994	WBGene00008092							WBGene00003220			WBGene00000887
WBGene00003598		WBGene00008250	WBGene00021692			WBGene00022077	WBGene00008127							WBGene00003224			WBGene00000888
WBGene00003599		WBGene00008251	WBGene00021787			WBGene00022138	WBGene00008230							WBGene00003225			WBGene00000889
WBGene00003601		WBGene00008290	WBGene00022004			WBGene00022278	WBGene00008275							WBGene00003233			WBGene00000890
WBGene00003613		WBGene00008294	WBGene00022300			WBGene00022313	WBGene00008283							WBGene00003234			WBGene00000891
WBGene00003628		WBGene00008304	WBGene00022392			WBGene00022454	WBGene00008297							WBGene00003235			WBGene00000892
WBGene00003629		WBGene00008396	WBGene00022492			WBGene00022567	WBGene00008314							WBGene00003242			WBGene00000896
WBGene00003709		WBGene00008433	WBGene00022511			WBGene00022570	WBGene00008330							WBGene00003243			WBGene00000898
WBGene00003732		WBGene00008477	WBGene00022536			WBGene00022572	WBGene00008331							WBGene00003247			WBGene00000906
WBGene00003843		WBGene00008485	WBGene00022554			WBGene00022573	WBGene00008387							WBGene00003367			WBGene00000914
WBGene00003845		WBGene00008486	WBGene00022647			WBGene00022574	WBGene00008400							WBGene00003368			WBGene00000915
WBGene00003862		WBGene00008491	WBGene00022672			WBGene00022631	WBGene00008443							WBGene00003373			WBGene00000917
WBGene00003863		WBGene00008512	WBGene00022772			WBGene00022664	WBGene00008551							WBGene00003377			WBGene00000923
WBGene00003933		WBGene00008516	WBGene00022881			WBGene00022808	WBGene00008592							WBGene00003378			WBGene00000933
WBGene00003934		WBGene00008549	WBGene00022887			WBGene00044079	WBGene00008601							WBGene00003387			WBGene00000934
WBGene00003962		WBGene00008552	WBGene00044083			WBGene00044651	WBGene00008607							WBGene00003394			WBGene00000936
WBGene00003976		WBGene00008593	WBGene00044260			WBGene00044689	WBGene00008621							WBGene00003396			WBGene00000937
WBGene00004020		WBGene00008594	WBGene00044568			WBGene00045063	WBGene00008683							WBGene00003397			WBGene00000939
WBGene00004023		WBGene00008595	WBGene00045237			WBGene00045419	WBGene00008711							WBGene00003404			WBGene00000940
WBGene00004026		WBGene00008596	WBGene00045407			WBGene00194986	WBGene00008750							WBGene00003415			WBGene00000958
WBGene00004030		WBGene00008597	WBGene00045484			WBGene00195248	WBGene00008890							WBGene00003418			WBGene00000959
WBGene00004050		WBGene00008610	WBGene00077696			WBGene00219378	WBGene00008925							WBGene00003423			WBGene00000960
WBGene00004056		WBGene00008652				WBGene00235102	WBGene00009058							WBGene00003472			WBGene00000962
WBGene00004062		WBGene00008748					WBGene00009146							WBGene00003476			WBGene00000963
WBGene00004182		WBGene00008957					WBGene00009178							WBGene00003480			WBGene00000964
WBGene00004216		WBGene00009001					WBGene00009286							WBGene00003510			WBGene00000966
WBGene00004218		WBGene00009110					WBGene00009323							WBGene00003516			WBGene00000967
WBGene00004219		WBGene00009113					WBGene00009370							WBGene00003561			WBGene00000970
WBGene00004220		WBGene00009153					WBGene00009389							WBGene00003576			WBGene00000971
WBGene00004221		WBGene00009156					WBGene00009499							WBGene00003585			WBGene00000973
WBGene00004222		WBGene00009255					WBGene00009540							WBGene00003594			WBGene00000974
WBGene00004223		WBGene00009306					WBGene00009558							WBGene00003597			WBGene00000976
WBGene00004225		WBGene00009314					WBGene00009584							WBGene00003605			WBGene00000979
WBGene00004226		WBGene00009384					WBGene00009594							WBGene00003623			WBGene00000981
WBGene00004227		WBGene00009386					WBGene00009648							WBGene00003681			WBGene00000982
WBGene00004228		WBGene00009445					WBGene00009691							WBGene00003731			WBGene00000983
WBGene00004229		WBGene00009661					WBGene00009692							WBGene00003736			WBGene00000984
WBGene00004230		WBGene00009854					WBGene00009730							WBGene00003738			WBGene00000988
WBGene00004231		WBGene00009855					WBGene00009800							WBGene00003787			WBGene00000993
WBGene00004232		WBGene00009856					WBGene00009818							WBGene00003789			WBGene00000996
WBGene00004234		WBGene00009857					WBGene00009824							WBGene00003796			WBGene00001001
WBGene00004235		WBGene00009859					WBGene00009827							WBGene00003797			WBGene00001005
WBGene00004236		WBGene00009860					WBGene00009899							WBGene00003800			WBGene00001006
WBGene00004237		WBGene00009999					WBGene00009924							WBGene00003821			WBGene00001007
WBGene00004239		WBGene00010167					WBGene00009929							WBGene00003822			WBGene00001016
WBGene00004241		WBGene00010169					WBGene00009932							WBGene00003826			WBGene00001018
WBGene00004242		WBGene00010228					WBGene00009939							WBGene00003827			WBGene00001019
WBGene00004243		WBGene00010399					WBGene00009958							WBGene00003830			WBGene00001020
WBGene00004275		WBGene00010416					WBGene00009993							WBGene00003836			WBGene00001025
WBGene00004347		WBGene00010434					WBGene00010063							WBGene00003841			WBGene00001026
WBGene00004374		WBGene00010583					WBGene00010120							WBGene00003842			WBGene00001027
WBGene00004384		WBGene00010661					WBGene00010199							WBGene00003846			WBGene00001029
WBGene00004699		WBGene00010694					WBGene00010339							WBGene00003847			WBGene00001030
WBGene00004702		WBGene00010730					WBGene00010349							WBGene00003882			WBGene00001031
WBGene00004748		WBGene00010763					WBGene00010364							WBGene00003889			WBGene00001033
WBGene00004775		WBGene00010800					WBGene00010380							WBGene00003905			WBGene00001035
WBGene00004795		WBGene00010802					WBGene00010383							WBGene00003918			WBGene00001038
WBGene00004798		WBGene00010905					WBGene00010465							WBGene00003947			WBGene00001039
WBGene00004809		WBGene00010960					WBGene00010593							WBGene00003948			WBGene00001041
WBGene00004810		WBGene00011248					WBGene00010614							WBGene00003953			WBGene00001042
WBGene00004811		WBGene00011259					WBGene00010671							WBGene00003970			WBGene00001045
WBGene00004812		WBGene00011456					WBGene00010709							WBGene00003978			WBGene00001046
WBGene00004813		WBGene00011523					WBGene00010731							WBGene00004029			WBGene00001047
WBGene00004814		WBGene00011558					WBGene00010755							WBGene00004031			WBGene00001048
WBGene00004815		WBGene00011584					WBGene00010768							WBGene00004046			WBGene00001050
WBGene00004816		WBGene00011621					WBGene00011051							WBGene00004061			WBGene00001051
WBGene00004818		WBGene00011755					WBGene00011146							WBGene00004068			WBGene00001052
WBGene00004819		WBGene00011779					WBGene00011242							WBGene00004076			WBGene00001054
WBGene00004820		WBGene00011837					WBGene00011318							WBGene00004077			WBGene00001055
WBGene00004821		WBGene00011852					WBGene00011367							WBGene00004089			WBGene00001056
WBGene00004822		WBGene00011853					WBGene00011401							WBGene00004117			WBGene00001058
WBGene00004823		WBGene00012022					WBGene00011436							WBGene00004121			WBGene00001073
WBGene00004825		WBGene00012023					WBGene00011437							WBGene00004130			WBGene00001077
WBGene00004826		WBGene00012024					WBGene00011462							WBGene00004136			WBGene00001078
WBGene00004827		WBGene00012025					WBGene00011532							WBGene00004140			WBGene00001082
WBGene00004859		WBGene00012054					WBGene00011556							WBGene00004147			WBGene00001089
WBGene00004862		WBGene00012055					WBGene00011559							WBGene00004166			WBGene00001090
WBGene00004890		WBGene00012103					WBGene00011587							WBGene00004186			WBGene00001092
WBGene00004893		WBGene00012166					WBGene00011589							WBGene00004191			WBGene00001093
WBGene00004894		WBGene00012196					WBGene00011614							WBGene00004192			WBGene00001094
WBGene00004900		WBGene00012236					WBGene00011631							WBGene00004193			WBGene00001095
WBGene00004901		WBGene00012328					WBGene00011688							WBGene00004195			WBGene00001101
WBGene00004902		WBGene00012330					WBGene00011739							WBGene00004201			WBGene00001115
WBGene00004904		WBGene00012332					WBGene00011803							WBGene00004203			WBGene00001117
WBGene00004906		WBGene00012379					WBGene00011830							WBGene00004212			WBGene00001118
WBGene00004908		WBGene00012582					WBGene00011871							WBGene00004217			WBGene00001119
WBGene00004909		WBGene00012583					WBGene00011878							WBGene00004224			WBGene00001129
WBGene00004911		WBGene00012621					WBGene00011882							WBGene00004270			WBGene00001130
WBGene00004925		WBGene00012626					WBGene00011932							WBGene00004271			WBGene00001134
WBGene00004926		WBGene00012678					WBGene00011936							WBGene00004276			WBGene00001135
WBGene00004958		WBGene00012767					WBGene00011955							WBGene00004296			WBGene00001137
WBGene00004962		WBGene00012782					WBGene00011965							WBGene00004318			WBGene00001149
WBGene00004972		WBGene00012967					WBGene00012131							WBGene00004335			WBGene00001150
WBGene00004976		WBGene00013075					WBGene00012201							WBGene00004336			WBGene00001151
WBGene00004984		WBGene00013292					WBGene00012276							WBGene00004337			WBGene00001153
WBGene00006065		WBGene00013308					WBGene00012352							WBGene00004340			WBGene00001154
WBGene00006066		WBGene00013383					WBGene00012445							WBGene00004343			WBGene00001155
WBGene00006067		WBGene00013443					WBGene00012469							WBGene00004348			WBGene00001160
WBGene00006068		WBGene00013489					WBGene00012496							WBGene00004361			WBGene00001167
WBGene00006366		WBGene00013493					WBGene00012562							WBGene00004364			WBGene00001172
WBGene00006371		WBGene00013607					WBGene00012718							WBGene00004367			WBGene00001173
WBGene00006372		WBGene00013608					WBGene00012739							WBGene00004368			WBGene00001177
WBGene00006374		WBGene00013609					WBGene00012794							WBGene00004372			WBGene00001179
WBGene00006395		WBGene00013900					WBGene00012813							WBGene00004375			WBGene00001184
WBGene00006441		WBGene00013901					WBGene00012828							WBGene00004377			WBGene00001187
WBGene00006454		WBGene00013903					WBGene00012829							WBGene00004388			WBGene00001188
WBGene00006462		WBGene00013904					WBGene00012855							WBGene00004390			WBGene00001189
WBGene00006484		WBGene00013905					WBGene00012894							WBGene00004393			WBGene00001196
WBGene00006522		WBGene00013906					WBGene00012970							WBGene00004395			WBGene00001202
WBGene00006539		WBGene00013967					WBGene00013014							WBGene00004404			WBGene00001208
WBGene00006544		WBGene00014020					WBGene00013030							WBGene00004409			WBGene00001209
WBGene00006549		WBGene00014093					WBGene00013043							WBGene00004419			WBGene00001224
WBGene00006553		WBGene00014117					WBGene00013135							WBGene00004427			WBGene00001226
WBGene00006554		WBGene00014124					WBGene00013188							WBGene00004432			WBGene00001227
WBGene00006556		WBGene00014137					WBGene00013239							WBGene00004438			WBGene00001228
WBGene00006557		WBGene00014138					WBGene00013244							WBGene00004439			WBGene00001229
WBGene00006558		WBGene00014669					WBGene00013260							WBGene00004450			WBGene00001230
WBGene00006559		WBGene00015019					WBGene00013440							WBGene00004453			WBGene00001231
WBGene00006570		WBGene00015110					WBGene00013513							WBGene00004459			WBGene00001232
WBGene00006576		WBGene00015111					WBGene00013575							WBGene00004484			WBGene00001233
WBGene00006582		WBGene00015114					WBGene00013585							WBGene00004488			WBGene00001234
WBGene00006583		WBGene00015145					WBGene00013654							WBGene00004498			WBGene00001236
WBGene00006591		WBGene00015198					WBGene00013665							WBGene00004680			WBGene00001241
WBGene00006592		WBGene00015287					WBGene00013674							WBGene00004682			WBGene00001248
WBGene00006593		WBGene00015299					WBGene00013677							WBGene00004698			WBGene00001258
WBGene00006604		WBGene00015332					WBGene00013680							WBGene00004701			WBGene00001259
WBGene00006610		WBGene00015403					WBGene00013715							WBGene00004703			WBGene00001262
WBGene00006621		WBGene00015466					WBGene00013792							WBGene00004704			WBGene00001263
WBGene00006637		WBGene00015532					WBGene00013869							WBGene00004705			WBGene00001303
WBGene00006640		WBGene00015535					WBGene00013896							WBGene00004706			WBGene00001328
WBGene00006657		WBGene00015631					WBGene00014018							WBGene00004723			WBGene00001330
WBGene00006658		WBGene00015639					WBGene00014052							WBGene00004732			WBGene00001331
WBGene00006659		WBGene00015673					WBGene00014115							WBGene00004735			WBGene00001333
WBGene00006663		WBGene00015692					WBGene00014153							WBGene00004740			WBGene00001334
WBGene00006664		WBGene00015694					WBGene00014240							WBGene00004742			WBGene00001335
WBGene00006665		WBGene00015695					WBGene00015057							WBGene00004749			WBGene00001336
WBGene00006666		WBGene00015739					WBGene00015074							WBGene00004762			WBGene00001338
WBGene00006667		WBGene00015865					WBGene00015091							WBGene00004767			WBGene00001340
WBGene00006668		WBGene00015942					WBGene00015130							WBGene00004771			WBGene00001352
WBGene00006670		WBGene00015982					WBGene00015150							WBGene00004773			WBGene00001358
WBGene00006672		WBGene00015993					WBGene00015188							WBGene00004782			WBGene00001366
WBGene00006673		WBGene00016013					WBGene00015247							WBGene00004793			WBGene00001368
WBGene00006674		WBGene00016088					WBGene00015249							WBGene00004800			WBGene00001377
WBGene00006675		WBGene00016189					WBGene00015303							WBGene00004803			WBGene00001395
WBGene00006676		WBGene00016190					WBGene00015349							WBGene00004829			WBGene00001396
WBGene00006677		WBGene00016191					WBGene00015418							WBGene00004874			WBGene00001403
WBGene00006678		WBGene00016202					WBGene00015462							WBGene00004879			WBGene00001404
WBGene00006679		WBGene00016375					WBGene00015464							WBGene00004881			WBGene00001405
WBGene00006681		WBGene00016389					WBGene00015499							WBGene00004882			WBGene00001406
WBGene00006682		WBGene00016450					WBGene00015516							WBGene00004884			WBGene00001411
WBGene00006683		WBGene00016451					WBGene00015565							WBGene00004886			WBGene00001414
WBGene00006684		WBGene00016577					WBGene00015650							WBGene00004887			WBGene00001426
WBGene00006685		WBGene00016762					WBGene00015691							WBGene00004889			WBGene00001431
WBGene00006686		WBGene00016769					WBGene00015704							WBGene00004891			WBGene00001443
WBGene00006687		WBGene00016912					WBGene00015789							WBGene00004896			WBGene00001475
WBGene00006688		WBGene00016944					WBGene00015794							WBGene00004919			WBGene00001476
WBGene00006690		WBGene00016951					WBGene00015939							WBGene00004950			WBGene00001477
WBGene00006691		WBGene00017034					WBGene00015994							WBGene00004975			WBGene00001478
WBGene00006692		WBGene00017170					WBGene00016029							WBGene00004979			WBGene00001480
WBGene00006693		WBGene00017315					WBGene00016062							WBGene00004981			WBGene00001485
WBGene00006694		WBGene00017329					WBGene00016101							WBGene00004985			WBGene00001497
WBGene00006695		WBGene00017331					WBGene00016116							WBGene00006310			WBGene00001499
WBGene00006710		WBGene00017332					WBGene00016162							WBGene00006318			WBGene00001502
WBGene00006717		WBGene00017333					WBGene00016269							WBGene00006321			WBGene00001503
WBGene00006737		WBGene00017336					WBGene00016343							WBGene00006324			WBGene00001508
WBGene00006739		WBGene00017364					WBGene00016421							WBGene00006359			WBGene00001509
WBGene00006741		WBGene00017449					WBGene00016540							WBGene00006365			WBGene00001510
WBGene00006765		WBGene00017615					WBGene00016600							WBGene00006368			WBGene00001512
WBGene00006827		WBGene00017710					WBGene00016601							WBGene00006369			WBGene00001515
WBGene00006861		WBGene00017791					WBGene00016602							WBGene00006385			WBGene00001519
WBGene00006865		WBGene00017947					WBGene00016603							WBGene00006388			WBGene00001520
WBGene00006886		WBGene00017948					WBGene00016614							WBGene00006389			WBGene00001522
WBGene00006895		WBGene00017959					WBGene00016631							WBGene00006393			WBGene00001523
WBGene00006935		WBGene00017967					WBGene00016725							WBGene00006406			WBGene00001526
WBGene00006959		WBGene00018000					WBGene00016793							WBGene00006423			WBGene00001527
WBGene00006988		WBGene00018002					WBGene00016842							WBGene00006442			WBGene00001558
WBGene00007006		WBGene00018071					WBGene00016846							WBGene00006444			WBGene00001577
WBGene00007041		WBGene00018105					WBGene00016868							WBGene00006467			WBGene00001579
WBGene00007044		WBGene00018215					WBGene00016888							WBGene00006468			WBGene00001580
WBGene00007064		WBGene00018317					WBGene00016973							WBGene00006483			WBGene00001582
WBGene00007071		WBGene00018384					WBGene00016977							WBGene00006489			WBGene00001585
WBGene00007130		WBGene00018385					WBGene00017054							WBGene00006496			WBGene00001590
WBGene00007154		WBGene00018402					WBGene00017123							WBGene00006508			WBGene00001612
WBGene00007170		WBGene00018403					WBGene00017164							WBGene00006513			WBGene00001613
WBGene00007176		WBGene00018465					WBGene00017210							WBGene00006514			WBGene00001620
WBGene00007252		WBGene00018478					WBGene00017240							WBGene00006516			WBGene00001626
WBGene00007255		WBGene00018479					WBGene00017320							WBGene00006519			WBGene00001627
WBGene00007270		WBGene00018480					WBGene00017326							WBGene00006524			WBGene00001628
WBGene00007328		WBGene00018543					WBGene00017328							WBGene00006540			WBGene00001629
WBGene00007331		WBGene00018659					WBGene00017487							WBGene00006542			WBGene00001632
WBGene00007394		WBGene00018660					WBGene00017515							WBGene00006543			WBGene00001635
WBGene00007396		WBGene00018692					WBGene00017565							WBGene00006572			WBGene00001636
WBGene00007397		WBGene00019227					WBGene00017642							WBGene00006574			WBGene00001638
WBGene00007462		WBGene00019232					WBGene00017742							WBGene00006590			WBGene00001639
WBGene00007605		WBGene00019233					WBGene00017757							WBGene00006652			WBGene00001640
WBGene00007635		WBGene00019234					WBGene00017860							WBGene00006654			WBGene00001641
WBGene00007691		WBGene00019235					WBGene00017920							WBGene00006698			WBGene00001642
WBGene00007692		WBGene00019339					WBGene00017931							WBGene00006700			WBGene00001643
WBGene00007693		WBGene00019342					WBGene00017988							WBGene00006704			WBGene00001644
WBGene00007695		WBGene00019379					WBGene00018023							WBGene00006706			WBGene00001645
WBGene00007732		WBGene00019515					WBGene00018138							WBGene00006713			WBGene00001646
WBGene00007813		WBGene00019516					WBGene00018160							WBGene00006714			WBGene00001648
WBGene00007824		WBGene00019590					WBGene00018475							WBGene00006721			WBGene00001650
WBGene00007877		WBGene00019649					WBGene00018516							WBGene00006722			WBGene00001651
WBGene00007929		WBGene00019885					WBGene00018531							WBGene00006723			WBGene00001660
WBGene00007930		WBGene00019886					WBGene00018567							WBGene00006725			WBGene00001661
WBGene00007938		WBGene00019899					WBGene00018609							WBGene00006727			WBGene00001662
WBGene00007988		WBGene00019901					WBGene00018698							WBGene00006735			WBGene00001674
WBGene00008022		WBGene00019928					WBGene00018716							WBGene00006738			WBGene00001679
WBGene00008039		WBGene00019959					WBGene00018738							WBGene00006744			WBGene00001680
WBGene00008076		WBGene00020134					WBGene00018757							WBGene00006750			WBGene00001683
WBGene00008086		WBGene00020151					WBGene00018819							WBGene00006751			WBGene00001684
WBGene00008107		WBGene00020154					WBGene00018831							WBGene00006754			WBGene00001685
WBGene00008129		WBGene00020220					WBGene00018990							WBGene00006766			WBGene00001686
WBGene00008147		WBGene00020327					WBGene00018998							WBGene00006770			WBGene00001687
WBGene00008160		WBGene00020328					WBGene00019030							WBGene00006772			WBGene00001708
WBGene00008185		WBGene00020587					WBGene00019102							WBGene00006773			WBGene00001709
WBGene00008186		WBGene00020592					WBGene00019128							WBGene00006780			WBGene00001740
WBGene00008214		WBGene00020593					WBGene00019257							WBGene00006786			WBGene00001743
WBGene00008223		WBGene00020594					WBGene00019264							WBGene00006788			WBGene00001744
WBGene00008231		WBGene00020651					WBGene00019289							WBGene00006796			WBGene00001745
WBGene00008259		WBGene00020655					WBGene00019347							WBGene00006797			WBGene00001746
WBGene00008260		WBGene00020693					WBGene00019394							WBGene00006812			WBGene00001747
WBGene00008265		WBGene00020701					WBGene00019424							WBGene00006818			WBGene00001748
WBGene00008266		WBGene00020800					WBGene00019535							WBGene00006839			WBGene00001759
WBGene00008267		WBGene00020867					WBGene00019584							WBGene00006853			WBGene00001790
WBGene00008269		WBGene00020884					WBGene00019616							WBGene00006873			WBGene00001791
WBGene00008270		WBGene00020954					WBGene00019617							WBGene00006881			WBGene00001792
WBGene00008278		WBGene00020961					WBGene00019786							WBGene00006882			WBGene00001793
WBGene00008280		WBGene00021003					WBGene00019817							WBGene00006893			WBGene00001794
WBGene00008284		WBGene00021237					WBGene00019883							WBGene00006920			WBGene00001808
WBGene00008293		WBGene00021238					WBGene00019935							WBGene00006923			WBGene00001814
WBGene00008296		WBGene00021305					WBGene00019986							WBGene00006931			WBGene00001815
WBGene00008397		WBGene00021353					WBGene00020031							WBGene00006941			WBGene00001816
WBGene00008407		WBGene00021372					WBGene00020036							WBGene00006958			WBGene00001819
WBGene00008409		WBGene00021464					WBGene00020097							WBGene00006970			WBGene00001823
WBGene00008449		WBGene00021553					WBGene00020113							WBGene00006971			WBGene00001827
WBGene00008451		WBGene00021578					WBGene00020130							WBGene00006975			WBGene00001834
WBGene00008453		WBGene00021613					WBGene00020163							WBGene00006976			WBGene00001840
WBGene00008471		WBGene00021646					WBGene00020166							WBGene00006994			WBGene00001843
WBGene00008476		WBGene00021682					WBGene00020273							WBGene00006999			WBGene00001844
WBGene00008479		WBGene00021839					WBGene00020284							WBGene00007013			WBGene00001860
WBGene00008490		WBGene00021853					WBGene00020368							WBGene00007019			WBGene00001863
WBGene00008542		WBGene00021948					WBGene00020369							WBGene00007022			WBGene00001872
WBGene00008560		WBGene00022030					WBGene00020389							WBGene00007027			WBGene00001876
WBGene00008581		WBGene00022168					WBGene00020427							WBGene00007030			WBGene00001877
WBGene00008591		WBGene00022207					WBGene00020444							WBGene00007053			WBGene00001878
WBGene00008609		WBGene00022250					WBGene00020471							WBGene00007060			WBGene00001879
WBGene00008661		WBGene00022261					WBGene00020486							WBGene00007100			WBGene00001880
WBGene00008663		WBGene00022271					WBGene00020530							WBGene00007101			WBGene00001881
WBGene00008681		WBGene00022565					WBGene00020604							WBGene00007105			WBGene00001882
WBGene00008692		WBGene00022566					WBGene00020784							WBGene00007107			WBGene00001883
WBGene00008730		WBGene00022568					WBGene00020838							WBGene00007110			WBGene00001885
WBGene00008732		WBGene00022569					WBGene00020903							WBGene00007118			WBGene00001886
WBGene00008749		WBGene00022579					WBGene00021132							WBGene00007126			WBGene00001887
WBGene00008776		WBGene00022748					WBGene00021214							WBGene00007135			WBGene00001888
WBGene00008779		WBGene00022773					WBGene00021316							WBGene00007167			WBGene00001889
WBGene00008799		WBGene00022778					WBGene00021320							WBGene00007195			WBGene00001890
WBGene00008801		WBGene00022866					WBGene00021363							WBGene00007200			WBGene00001891
WBGene00008802		WBGene00022867					WBGene00021367							WBGene00007237			WBGene00001892
WBGene00008804		WBGene00022868					WBGene00021376							WBGene00007312			WBGene00001893
WBGene00008821		WBGene00022870					WBGene00021412							WBGene00007333			WBGene00001894
WBGene00008861		WBGene00022871					WBGene00021423							WBGene00007386			WBGene00001895
WBGene00008911		WBGene00022872					WBGene00021502							WBGene00007409			WBGene00001896
WBGene00008929		WBGene00022873					WBGene00021503							WBGene00007419			WBGene00001899
WBGene00008936		WBGene00023409					WBGene00021561							WBGene00007433			WBGene00001901
WBGene00008952		WBGene00044286					WBGene00021629							WBGene00007464			WBGene00001903
WBGene00008969		WBGene00044322					WBGene00021683							WBGene00007488			WBGene00001904
WBGene00008976		WBGene00044331					WBGene00021715							WBGene00007490			WBGene00001905
WBGene00008977		WBGene00044332					WBGene00021812							WBGene00007500			WBGene00001906
WBGene00008987		WBGene00044344					WBGene00021815							WBGene00007513			WBGene00001907
WBGene00008997		WBGene00044608					WBGene00021852							WBGene00007520			WBGene00001908
WBGene00008998		WBGene00044612					WBGene00021856							WBGene00007529			WBGene00001909
WBGene00009039		WBGene00044790					WBGene00021900							WBGene00007603			WBGene00001912
WBGene00009059		WBGene00044811					WBGene00021901							WBGene00007606			WBGene00001915
WBGene00009073		WBGene00077763					WBGene00021929							WBGene00007616			WBGene00001916
WBGene00009089		WBGene00194710					WBGene00021933							WBGene00007621			WBGene00001917
WBGene00009129		WBGene00195063					WBGene00021945							WBGene00007627			WBGene00001918
WBGene00009142							WBGene00021984							WBGene00007628			WBGene00001919
WBGene00009148							WBGene00022025							WBGene00007630			WBGene00001920
WBGene00009160							WBGene00022040							WBGene00007631			WBGene00001921
WBGene00009162							WBGene00022053							WBGene00007645			WBGene00001922
WBGene00009192							WBGene00022057							WBGene00007646			WBGene00001923
WBGene00009241							WBGene00022128							WBGene00007653			WBGene00001925
WBGene00009263							WBGene00022175							WBGene00007683			WBGene00001926
WBGene00009272							WBGene00022192							WBGene00007694			WBGene00001927
WBGene00009278							WBGene00022256							WBGene00007697			WBGene00001928
WBGene00009315							WBGene00022296							WBGene00007698			WBGene00001929
WBGene00009325							WBGene00022348							WBGene00007704			WBGene00001930
WBGene00009340							WBGene00022361							WBGene00007705			WBGene00001931
WBGene00009343							WBGene00022365							WBGene00007706			WBGene00001932
WBGene00009347							WBGene00022367							WBGene00007708			WBGene00001933
WBGene00009378							WBGene00022434							WBGene00007718			WBGene00001934
WBGene00009444							WBGene00022435							WBGene00007750			WBGene00001935
WBGene00009447							WBGene00022512							WBGene00007756			WBGene00001936
WBGene00009448							WBGene00022531							WBGene00007761			WBGene00001937
WBGene00009456							WBGene00022635							WBGene00007786			WBGene00001938
WBGene00009508							WBGene00022727							WBGene00007857			WBGene00001939
WBGene00009548							WBGene00022769							WBGene00007912			WBGene00001940
WBGene00009595							WBGene00022785							WBGene00007923			WBGene00001941
WBGene00009604							WBGene00022854							WBGene00007955			WBGene00001942
WBGene00009695							WBGene00023404							WBGene00007965			WBGene00001945
WBGene00009729							WBGene00023450							WBGene00007983			WBGene00001972
WBGene00009753							WBGene00023491							WBGene00007984			WBGene00001973
WBGene00009790							WBGene00043056							WBGene00008094			WBGene00001974
WBGene00009799							WBGene00044067							WBGene00008140			WBGene00001978
WBGene00009921							WBGene00044233							WBGene00008143			WBGene00001979
WBGene00009954							WBGene00044330							WBGene00008183			WBGene00001983
WBGene00009956							WBGene00044604							WBGene00008218			WBGene00001993
WBGene00009960							WBGene00044650							WBGene00008236			WBGene00002001
WBGene00009962							WBGene00044738							WBGene00008252			WBGene00002003
WBGene00009977							WBGene00189952							WBGene00008274			WBGene00002005
WBGene00010010														WBGene00008348			WBGene00002007
WBGene00010011														WBGene00008361			WBGene00002008
WBGene00010036														WBGene00008362			WBGene00002010
WBGene00010037														WBGene00008380			WBGene00002025
WBGene00010047														WBGene00008414			WBGene00002028
WBGene00010067														WBGene00008418			WBGene00002031
WBGene00010070														WBGene00008422			WBGene00002035
WBGene00010082														WBGene00008424			WBGene00002036
WBGene00010093														WBGene00008426			WBGene00002038
WBGene00010134														WBGene00008427			WBGene00002039
WBGene00010162														WBGene00008428			WBGene00002041
WBGene00010264														WBGene00008457			WBGene00002042
WBGene00010270														WBGene00008555			WBGene00002043
WBGene00010275														WBGene00008570			WBGene00002044
WBGene00010280														WBGene00008585			WBGene00002045
WBGene00010307														WBGene00008641			WBGene00002050
WBGene00010309														WBGene00008643			WBGene00002051
WBGene00010323														WBGene00008665			WBGene00002052
WBGene00010329														WBGene00008666			WBGene00002061
WBGene00010411														WBGene00008667			WBGene00002062
WBGene00010417														WBGene00008670			WBGene00002070
WBGene00010421														WBGene00008682			WBGene00002071
WBGene00010470														WBGene00008687			WBGene00002074
WBGene00010471														WBGene00008688			WBGene00002075
WBGene00010472														WBGene00008722			WBGene00002076
WBGene00010473														WBGene00008745			WBGene00002077
WBGene00010498														WBGene00008764			WBGene00002078
WBGene00010545														WBGene00008805			WBGene00002080
WBGene00010558														WBGene00008857			WBGene00002081
WBGene00010562														WBGene00008860			WBGene00002083
WBGene00010572														WBGene00008878			WBGene00002146
WBGene00010621														WBGene00008887			WBGene00002147
WBGene00010636														WBGene00008918			WBGene00002150
WBGene00010637														WBGene00008921			WBGene00002152
WBGene00010654														WBGene00008948			WBGene00002153
WBGene00010666														WBGene00008973			WBGene00002162
WBGene00010678														WBGene00009004			WBGene00002169
WBGene00010681														WBGene00009011			WBGene00002173
WBGene00010684														WBGene00009013			WBGene00002178
WBGene00010698														WBGene00009078			WBGene00002181
WBGene00010700														WBGene00009098			WBGene00002182
WBGene00010712														WBGene00009103			WBGene00002183
WBGene00010738														WBGene00009118			WBGene00002184
WBGene00010741														WBGene00009139			WBGene00002185
WBGene00010784														WBGene00009141			WBGene00002189
WBGene00010902														WBGene00009174			WBGene00002190
WBGene00010919														WBGene00009176			WBGene00002191
WBGene00010936														WBGene00009180			WBGene00002196
WBGene00010985														WBGene00009189			WBGene00002201
WBGene00010999														WBGene00009191			WBGene00002202
WBGene00011000														WBGene00009200			WBGene00002203
WBGene00011039														WBGene00009201			WBGene00002213
WBGene00011053														WBGene00009204			WBGene00002215
WBGene00011055														WBGene00009238			WBGene00002217
WBGene00011069														WBGene00009245			WBGene00002219
WBGene00011076														WBGene00009258			WBGene00002222
WBGene00011088														WBGene00009267			WBGene00002223
WBGene00011090														WBGene00009289			WBGene00002229
WBGene00011092														WBGene00009304			WBGene00002230
WBGene00011093														WBGene00009307			WBGene00002232
WBGene00011102														WBGene00009329			WBGene00002233
WBGene00011105														WBGene00009337			WBGene00002235
WBGene00011112														WBGene00009341			WBGene00002238
WBGene00011168														WBGene00009353			WBGene00002243
WBGene00011169														WBGene00009367			WBGene00002245
WBGene00011175														WBGene00009403			WBGene00002247
WBGene00011249														WBGene00009443			WBGene00002248
WBGene00011270														WBGene00009460			WBGene00002249
WBGene00011276														WBGene00009477			WBGene00002251
WBGene00011279														WBGene00009479			WBGene00002257
WBGene00011299														WBGene00009484			WBGene00002258
WBGene00011326														WBGene00009507			WBGene00002261
WBGene00011339														WBGene00009514			WBGene00002262
WBGene00011345														WBGene00009532			WBGene00002278
WBGene00011354														WBGene00009553			WBGene00002280
WBGene00011355														WBGene00009565			WBGene00002324
WBGene00011356														WBGene00009586			WBGene00002335
WBGene00011358														WBGene00009627			WBGene00002348
WBGene00011359														WBGene00009650			WBGene00002363
WBGene00011360														WBGene00009665			WBGene00002497
WBGene00011361														WBGene00009686			WBGene00002632
WBGene00011362														WBGene00009706			WBGene00002637
WBGene00011364														WBGene00009717			WBGene00002694
WBGene00011423														WBGene00009731			WBGene00002845
WBGene00011439														WBGene00009738			WBGene00002855
WBGene00011503														WBGene00009745			WBGene00002879
WBGene00011595														WBGene00009811			WBGene00002889
WBGene00011606														WBGene00009882			WBGene00002891
WBGene00011611														WBGene00009885			WBGene00002978
WBGene00011613														WBGene00009892			WBGene00002980
WBGene00011650														WBGene00009908			WBGene00002981
WBGene00011655														WBGene00009922			WBGene00002985
WBGene00011658														WBGene00009930			WBGene00002988
WBGene00011756														WBGene00009973			WBGene00002989
WBGene00011781														WBGene00009996			WBGene00002991
WBGene00011835														WBGene00009998			WBGene00002996
WBGene00011880														WBGene00010002			WBGene00002998
WBGene00011939														WBGene00010013			WBGene00003007
WBGene00011971														WBGene00010028			WBGene00003009
WBGene00011992														WBGene00010056			WBGene00003020
WBGene00011994														WBGene00010096			WBGene00003025
WBGene00012011														WBGene00010117			WBGene00003026
WBGene00012040														WBGene00010138			WBGene00003030
WBGene00012075														WBGene00010204			WBGene00003036
WBGene00012084														WBGene00010230			WBGene00003041
WBGene00012099														WBGene00010231			WBGene00003047
WBGene00012102														WBGene00010337			WBGene00003048
WBGene00012114														WBGene00010354			WBGene00003052
WBGene00012115														WBGene00010356			WBGene00003059
WBGene00012135														WBGene00010374			WBGene00003061
WBGene00012138														WBGene00010418			WBGene00003063
WBGene00012143														WBGene00010420			WBGene00003064
WBGene00012186														WBGene00010425			WBGene00003071
WBGene00012224														WBGene00010427			WBGene00003073
WBGene00012233														WBGene00010476			WBGene00003074
WBGene00012270														WBGene00010479			WBGene00003076
WBGene00012271														WBGene00010500			WBGene00003077
WBGene00012275														WBGene00010502			WBGene00003079
WBGene00012285														WBGene00010551			WBGene00003080
WBGene00012302														WBGene00010557			WBGene00003081
WBGene00012369														WBGene00010560			WBGene00003082
WBGene00012373														WBGene00010579			WBGene00003086
WBGene00012385														WBGene00010610			WBGene00003112
WBGene00012393														WBGene00010620			WBGene00003119
WBGene00012424														WBGene00010640			WBGene00003123
WBGene00012425														WBGene00010641			WBGene00003129
WBGene00012428														WBGene00010642			WBGene00003136
WBGene00012475														WBGene00010675			WBGene00003143
WBGene00012489														WBGene00010676			WBGene00003148
WBGene00012532														WBGene00010701			WBGene00003150
WBGene00012535														WBGene00010702			WBGene00003153
WBGene00012536														WBGene00010703			WBGene00003154
WBGene00012573														WBGene00010704			WBGene00003156
WBGene00012586														WBGene00010716			WBGene00003157
WBGene00012629														WBGene00010722			WBGene00003159
WBGene00012648														WBGene00010732			WBGene00003161
WBGene00012681														WBGene00010736			WBGene00003162
WBGene00012682														WBGene00010759			WBGene00003164
WBGene00012683														WBGene00010767			WBGene00003175
WBGene00012686														WBGene00010771			WBGene00003185
WBGene00012688														WBGene00010780			WBGene00003186
WBGene00012716														WBGene00010845			WBGene00003214
WBGene00012723														WBGene00010890			WBGene00003232
WBGene00012726														WBGene00010891			WBGene00003246
WBGene00012747														WBGene00010898			WBGene00003253
WBGene00012763														WBGene00010908			WBGene00003254
WBGene00012776														WBGene00010909			WBGene00003372
WBGene00012787														WBGene00010923			WBGene00003375
WBGene00012792														WBGene00010925			WBGene00003376
WBGene00012806														WBGene00010975			WBGene00003389
WBGene00012814														WBGene00010990			WBGene00003392
WBGene00012815														WBGene00011033			WBGene00003393
WBGene00012816														WBGene00011035			WBGene00003400
WBGene00012832														WBGene00011040			WBGene00003401
WBGene00012835														WBGene00011043			WBGene00003405
WBGene00012845														WBGene00011058			WBGene00003407
WBGene00012857														WBGene00011064			WBGene00003408
WBGene00012915														WBGene00011067			WBGene00003411
WBGene00012934														WBGene00011068			WBGene00003417
WBGene00012976														WBGene00011109			WBGene00003421
WBGene00013050														WBGene00011144			WBGene00003422
WBGene00013052														WBGene00011194			WBGene00003475
WBGene00013072														WBGene00011240			WBGene00003477
WBGene00013076														WBGene00011247			WBGene00003478
WBGene00013080														WBGene00011268			WBGene00003479
WBGene00013119														WBGene00011283			WBGene00003485
WBGene00013124														WBGene00011298			WBGene00003504
WBGene00013147														WBGene00011315			WBGene00003514
WBGene00013156														WBGene00011327			WBGene00003515
WBGene00013159														WBGene00011334			WBGene00003517
WBGene00013166														WBGene00011338			WBGene00003519
WBGene00013184														WBGene00011348			WBGene00003555
WBGene00013194														WBGene00011353			WBGene00003558
WBGene00013235														WBGene00011408			WBGene00003563
WBGene00013256														WBGene00011467			WBGene00003567
WBGene00013261														WBGene00011481			WBGene00003569
WBGene00013270														WBGene00011507			WBGene00003572
WBGene00013293														WBGene00011511			WBGene00003573
WBGene00013300														WBGene00011527			WBGene00003574
WBGene00013338														WBGene00011554			WBGene00003575
WBGene00013475														WBGene00011563			WBGene00003579
WBGene00013477														WBGene00011573			WBGene00003580
WBGene00013480														WBGene00011576			WBGene00003583
WBGene00013486														WBGene00011593			WBGene00003584
WBGene00013487														WBGene00011596			WBGene00003586
WBGene00013517														WBGene00011604			WBGene00003587
WBGene00013520														WBGene00011645			WBGene00003589
WBGene00013534														WBGene00011679			WBGene00003596
WBGene00013594														WBGene00011696			WBGene00003622
WBGene00013646														WBGene00011729			WBGene00003654
WBGene00013655														WBGene00011740			WBGene00003733
WBGene00013682														WBGene00011743			WBGene00003735
WBGene00013689														WBGene00011759			WBGene00003772
WBGene00013692														WBGene00011824			WBGene00003774
WBGene00013734														WBGene00011828			WBGene00003775
WBGene00013746														WBGene00011834			WBGene00003776
WBGene00013764														WBGene00011897			WBGene00003778
WBGene00013801														WBGene00011908			WBGene00003788
WBGene00013811														WBGene00011964			WBGene00003794
WBGene00013846														WBGene00011969			WBGene00003798
WBGene00013849														WBGene00011970			WBGene00003799
WBGene00013862														WBGene00011980			WBGene00003803
WBGene00013873														WBGene00012094			WBGene00003804
WBGene00013874														WBGene00012100			WBGene00003806
WBGene00013875														WBGene00012124			WBGene00003815
WBGene00013883														WBGene00012132			WBGene00003816
WBGene00013965														WBGene00012158			WBGene00003818
WBGene00013973														WBGene00012164			WBGene00003825
WBGene00013999														WBGene00012177			WBGene00003829
WBGene00014053														WBGene00012194			WBGene00003831
WBGene00014074														WBGene00012209			WBGene00003834
WBGene00014097														WBGene00012234			WBGene00003844
WBGene00014102														WBGene00012244			WBGene00003858
WBGene00014103														WBGene00012245			WBGene00003870
WBGene00014161														WBGene00012295			WBGene00003876
WBGene00014171														WBGene00012322			WBGene00003877
WBGene00014201														WBGene00012343			WBGene00003883
WBGene00014213														WBGene00012354			WBGene00003884
WBGene00014236														WBGene00012356			WBGene00003885
WBGene00014864														WBGene00012359			WBGene00003886
WBGene00014965														WBGene00012366			WBGene00003892
WBGene00015026														WBGene00012371			WBGene00003893
WBGene00015038														WBGene00012389			WBGene00003898
WBGene00015061														WBGene00012394			WBGene00003901
WBGene00015073														WBGene00012464			WBGene00003902
WBGene00015083														WBGene00012465			WBGene00003903
WBGene00015087														WBGene00012484			WBGene00003904
WBGene00015088														WBGene00012558			WBGene00003906
WBGene00015126														WBGene00012631			WBGene00003907
WBGene00015246														WBGene00012639			WBGene00003911
WBGene00015250														WBGene00012643			WBGene00003914
WBGene00015258														WBGene00012650			WBGene00003916
WBGene00015260														WBGene00012659			WBGene00003919
WBGene00015264														WBGene00012722			WBGene00003921
WBGene00015268														WBGene00012735			WBGene00003922
WBGene00015278														WBGene00012756			WBGene00003923
WBGene00015279														WBGene00012765			WBGene00003924
WBGene00015284														WBGene00012769			WBGene00003925
WBGene00015285														WBGene00012780			WBGene00003926
WBGene00015295														WBGene00012804			WBGene00003927
WBGene00015324														WBGene00012830			WBGene00003928
WBGene00015331														WBGene00012858			WBGene00003929
WBGene00015336														WBGene00012887			WBGene00003930
WBGene00015361														WBGene00012891			WBGene00003931
WBGene00015381														WBGene00012904			WBGene00003932
WBGene00015387														WBGene00012907			WBGene00003949
WBGene00015388														WBGene00012925			WBGene00003950
WBGene00015407														WBGene00012927			WBGene00003951
WBGene00015412														WBGene00012933			WBGene00003952
WBGene00015425														WBGene00012935			WBGene00003954
WBGene00015467														WBGene00012950			WBGene00003955
WBGene00015472														WBGene00012984			WBGene00003961
WBGene00015501														WBGene00012987			WBGene00003963
WBGene00015510														WBGene00012990			WBGene00003964
WBGene00015567														WBGene00012997			WBGene00003965
WBGene00015583														WBGene00013038			WBGene00003966
WBGene00015628														WBGene00013082			WBGene00003967
WBGene00015651														WBGene00013093			WBGene00003969
WBGene00015680														WBGene00013095			WBGene00003975
WBGene00015700														WBGene00013136			WBGene00003980
WBGene00015716														WBGene00013150			WBGene00003995
WBGene00015773														WBGene00013202			WBGene00004003
WBGene00015855														WBGene00013209			WBGene00004014
WBGene00015861														WBGene00013217			WBGene00004015
WBGene00015867														WBGene00013223			WBGene00004016
WBGene00015871														WBGene00013224			WBGene00004025
WBGene00015894														WBGene00013255			WBGene00004028
WBGene00015929														WBGene00013258			WBGene00004032
WBGene00015930														WBGene00013268			WBGene00004033
WBGene00015940														WBGene00013269			WBGene00004034
WBGene00016006														WBGene00013301			WBGene00004035
WBGene00016022														WBGene00013339			WBGene00004036
WBGene00016063														WBGene00013344			WBGene00004038
WBGene00016064														WBGene00013347			WBGene00004039
WBGene00016066														WBGene00013373			WBGene00004040
WBGene00016072														WBGene00013376			WBGene00004042
WBGene00016085														WBGene00013378			WBGene00004043
WBGene00016104														WBGene00013406			WBGene00004045
WBGene00016111														WBGene00013407			WBGene00004047
WBGene00016134														WBGene00013433			WBGene00004049
WBGene00016135														WBGene00013447			WBGene00004055
WBGene00016152														WBGene00013455			WBGene00004058
WBGene00016154														WBGene00013529			WBGene00004059
WBGene00016196														WBGene00013538			WBGene00004060
WBGene00016221														WBGene00013541			WBGene00004063
WBGene00016251														WBGene00013544			WBGene00004064
WBGene00016252														WBGene00013643			WBGene00004075
WBGene00016253														WBGene00013666			WBGene00004085
WBGene00016294														WBGene00013669			WBGene00004087
WBGene00016300														WBGene00013671			WBGene00004088
WBGene00016306														WBGene00013683			WBGene00004090
WBGene00016373														WBGene00013720			WBGene00004092
WBGene00016382														WBGene00013730			WBGene00004101
WBGene00016416														WBGene00013738			WBGene00004109
WBGene00016423														WBGene00013808			WBGene00004131
WBGene00016431														WBGene00013857			WBGene00004134
WBGene00016462														WBGene00013894			WBGene00004151
WBGene00016468														WBGene00013917			WBGene00004178
WBGene00016566														WBGene00013921			WBGene00004179
WBGene00016595														WBGene00013971			WBGene00004180
WBGene00016613														WBGene00013972			WBGene00004181
WBGene00016628														WBGene00013983			WBGene00004183
WBGene00016661														WBGene00013984			WBGene00004184
WBGene00016698														WBGene00013985			WBGene00004185
WBGene00016803														WBGene00013994			WBGene00004187
WBGene00016841														WBGene00013997			WBGene00004188
WBGene00016890														WBGene00014011			WBGene00004190
WBGene00016942														WBGene00014015			WBGene00004194
WBGene00016948														WBGene00014022			WBGene00004197
WBGene00016954														WBGene00014034			WBGene00004198
WBGene00016970														WBGene00014051			WBGene00004204
WBGene00016974														WBGene00014066			WBGene00004205
WBGene00016984														WBGene00014077			WBGene00004206
WBGene00017026														WBGene00014151			WBGene00004207
WBGene00017028														WBGene00014152			WBGene00004208
WBGene00017045														WBGene00014174			WBGene00004210
WBGene00017055														WBGene00014208			WBGene00004213
WBGene00017069														WBGene00014224			WBGene00004215
WBGene00017078														WBGene00014230			WBGene00004233
WBGene00017080														WBGene00014256			WBGene00004248
WBGene00017083														WBGene00015001			WBGene00004254
WBGene00017098														WBGene00015029			WBGene00004255
WBGene00017108														WBGene00015052			WBGene00004256
WBGene00017124														WBGene00015092			WBGene00004257
WBGene00017176														WBGene00015098			WBGene00004258
WBGene00017195														WBGene00015104			WBGene00004259
WBGene00017277														WBGene00015124			WBGene00004266
WBGene00017279														WBGene00015128			WBGene00004267
WBGene00017310														WBGene00015143			WBGene00004268
WBGene00017314														WBGene00015146			WBGene00004272
WBGene00017375														WBGene00015177			WBGene00004273
WBGene00017387														WBGene00015190			WBGene00004274
WBGene00017388														WBGene00015194			WBGene00004277
WBGene00017394														WBGene00015203			WBGene00004278
WBGene00017399														WBGene00015207			WBGene00004279
WBGene00017427														WBGene00015237			WBGene00004281
WBGene00017428														WBGene00015270			WBGene00004282
WBGene00017443														WBGene00015286			WBGene00004283
WBGene00017471														WBGene00015288			WBGene00004285
WBGene00017535														WBGene00015293			WBGene00004286
WBGene00017543														WBGene00015296			WBGene00004287
WBGene00017544														WBGene00015298			WBGene00004297
WBGene00017571														WBGene00015308			WBGene00004298
WBGene00017576														WBGene00015356			WBGene00004302
WBGene00017580														WBGene00015460			WBGene00004304
WBGene00017620														WBGene00015485			WBGene00004305
WBGene00017630														WBGene00015486			WBGene00004307
WBGene00017647														WBGene00015554			WBGene00004308
WBGene00017648														WBGene00015555			WBGene00004310
WBGene00017657														WBGene00015579			WBGene00004311
WBGene00017671														WBGene00015632			WBGene00004313
WBGene00017678														WBGene00015648			WBGene00004314
WBGene00017690														WBGene00015662			WBGene00004315
WBGene00017736														WBGene00015697			WBGene00004317
WBGene00017737														WBGene00015735			WBGene00004319
WBGene00017770														WBGene00015742			WBGene00004320
WBGene00017865														WBGene00015744			WBGene00004321
WBGene00017876														WBGene00015779			WBGene00004322
WBGene00017879														WBGene00015866			WBGene00004338
WBGene00017881														WBGene00015920			WBGene00004339
WBGene00017937														WBGene00015926			WBGene00004341
WBGene00017944														WBGene00015927			WBGene00004344
WBGene00017969														WBGene00015934			WBGene00004345
WBGene00018034														WBGene00015943			WBGene00004355
WBGene00018035														WBGene00015955			WBGene00004356
WBGene00018124														WBGene00016014			WBGene00004357
WBGene00018135														WBGene00016019			WBGene00004358
WBGene00018137														WBGene00016061			WBGene00004371
WBGene00018151														WBGene00016074			WBGene00004373
WBGene00018205														WBGene00016106			WBGene00004378
WBGene00018209														WBGene00016112			WBGene00004381
WBGene00018210														WBGene00016123			WBGene00004383
WBGene00018246														WBGene00016144			WBGene00004385
WBGene00018333														WBGene00016150			WBGene00004386
WBGene00018349														WBGene00016151			WBGene00004387
WBGene00018358														WBGene00016156			WBGene00004389
WBGene00018365														WBGene00016157			WBGene00004391
WBGene00018376														WBGene00016158			WBGene00004392
WBGene00018392														WBGene00016165			WBGene00004400
WBGene00018414														WBGene00016170			WBGene00004402
WBGene00018468														WBGene00016192			WBGene00004403
WBGene00018504														WBGene00016197			WBGene00004405
WBGene00018525														WBGene00016209			WBGene00004408
WBGene00018530														WBGene00016245			WBGene00004411
WBGene00018563														WBGene00016249			WBGene00004412
WBGene00018572														WBGene00016260			WBGene00004413
WBGene00018591														WBGene00016265			WBGene00004414
WBGene00018594														WBGene00016323			WBGene00004415
WBGene00018603														WBGene00016390			WBGene00004416
WBGene00018611														WBGene00016395			WBGene00004417
WBGene00018710														WBGene00016407			WBGene00004418
WBGene00018740														WBGene00016408			WBGene00004420
WBGene00018741														WBGene00016418			WBGene00004421
WBGene00018763														WBGene00016448			WBGene00004422
WBGene00018764														WBGene00016452			WBGene00004423
WBGene00018774														WBGene00016490			WBGene00004424
WBGene00018779														WBGene00016493			WBGene00004425
WBGene00018781														WBGene00016497			WBGene00004426
WBGene00018812														WBGene00016524			WBGene00004428
WBGene00018878														WBGene00016562			WBGene00004429
WBGene00018880														WBGene00016606			WBGene00004430
WBGene00018895														WBGene00016608			WBGene00004431
WBGene00018904														WBGene00016623			WBGene00004433
WBGene00018906														WBGene00016642			WBGene00004434
WBGene00018930														WBGene00016678			WBGene00004435
WBGene00018935														WBGene00016704			WBGene00004436
WBGene00018949														WBGene00016751			WBGene00004437
WBGene00018959														WBGene00016754			WBGene00004440
WBGene00018982														WBGene00016792			WBGene00004441
WBGene00018987														WBGene00016811			WBGene00004444
WBGene00018997														WBGene00016848			WBGene00004445
WBGene00018999														WBGene00016849			WBGene00004446
WBGene00019069														WBGene00016902			WBGene00004447
WBGene00019081														WBGene00016961			WBGene00004449
WBGene00019094														WBGene00016981			WBGene00004452
WBGene00019104														WBGene00016983			WBGene00004454
WBGene00019105														WBGene00016989			WBGene00004456
WBGene00019151														WBGene00016990			WBGene00004457
WBGene00019185														WBGene00017004			WBGene00004458
WBGene00019212														WBGene00017011			WBGene00004460
WBGene00019229														WBGene00017013			WBGene00004461
WBGene00019249														WBGene00017014			WBGene00004462
WBGene00019268														WBGene00017025			WBGene00004463
WBGene00019270														WBGene00017033			WBGene00004464
WBGene00019314														WBGene00017037			WBGene00004465
WBGene00019317														WBGene00017044			WBGene00004466
WBGene00019344														WBGene00017064			WBGene00004467
WBGene00019346														WBGene00017088			WBGene00004468
WBGene00019351														WBGene00017103			WBGene00004469
WBGene00019352														WBGene00017122			WBGene00004470
WBGene00019408														WBGene00017158			WBGene00004471
WBGene00019451														WBGene00017161			WBGene00004472
WBGene00019461														WBGene00017169			WBGene00004473
WBGene00019479														WBGene00017178			WBGene00004474
WBGene00019489														WBGene00017238			WBGene00004475
WBGene00019530														WBGene00017311			WBGene00004476
WBGene00019531														WBGene00017352			WBGene00004477
WBGene00019546														WBGene00017373			WBGene00004478
WBGene00019605														WBGene00017430			WBGene00004479
WBGene00019608														WBGene00017546			WBGene00004480
WBGene00019619														WBGene00017547			WBGene00004481
WBGene00019665														WBGene00017592			WBGene00004482
WBGene00019746														WBGene00017594			WBGene00004483
WBGene00019756														WBGene00017605			WBGene00004485
WBGene00019757														WBGene00017640			WBGene00004486
WBGene00019792														WBGene00017646			WBGene00004487
WBGene00019801														WBGene00017687			WBGene00004489
WBGene00019811														WBGene00017769			WBGene00004490
WBGene00019814														WBGene00017778			WBGene00004491
WBGene00019815														WBGene00017799			WBGene00004492
WBGene00019842														WBGene00017812			WBGene00004493
WBGene00019844														WBGene00017816			WBGene00004494
WBGene00019919														WBGene00017825			WBGene00004495
WBGene00019977														WBGene00017837			WBGene00004496
WBGene00019978														WBGene00017904			WBGene00004497
WBGene00020046														WBGene00017914			WBGene00004501
WBGene00020048														WBGene00017924			WBGene00004502
WBGene00020106														WBGene00017928			WBGene00004503
WBGene00020111														WBGene00017929			WBGene00004504
WBGene00020149														WBGene00017951			WBGene00004505
WBGene00020236														WBGene00017974			WBGene00004506
WBGene00020263														WBGene00017975			WBGene00004507
WBGene00020324														WBGene00017981			WBGene00004679
WBGene00020419														WBGene00017997			WBGene00004700
WBGene00020425														WBGene00017999			WBGene00004719
WBGene00020442														WBGene00018011			WBGene00004727
WBGene00020465														WBGene00018036			WBGene00004728
WBGene00020496														WBGene00018037			WBGene00004729
WBGene00020503														WBGene00018060			WBGene00004736
WBGene00020504														WBGene00018132			WBGene00004738
WBGene00020528														WBGene00018161			WBGene00004743
WBGene00020559														WBGene00018213			WBGene00004744
WBGene00020567														WBGene00018218			WBGene00004752
WBGene00020575														WBGene00018238			WBGene00004753
WBGene00020590														WBGene00018240			WBGene00004754
WBGene00020605														WBGene00018269			WBGene00004755
WBGene00020631														WBGene00018307			WBGene00004756
WBGene00020633														WBGene00018328			WBGene00004758
WBGene00020648														WBGene00018330			WBGene00004759
WBGene00020657														WBGene00018340			WBGene00004760
WBGene00020673														WBGene00018362			WBGene00004766
WBGene00020674														WBGene00018393			WBGene00004768
WBGene00020678														WBGene00018512			WBGene00004769
WBGene00020688														WBGene00018519			WBGene00004774
WBGene00020702														WBGene00018586			WBGene00004781
WBGene00020767														WBGene00018672			WBGene00004787
WBGene00020788														WBGene00018674			WBGene00004788
WBGene00020797														WBGene00018681			WBGene00004789
WBGene00020827														WBGene00018700			WBGene00004790
WBGene00020841														WBGene00018719			WBGene00004801
WBGene00020847														WBGene00018723			WBGene00004802
WBGene00020895														WBGene00018734			WBGene00004806
WBGene00020908														WBGene00018737			WBGene00004807
WBGene00020927														WBGene00018765			WBGene00004808
WBGene00020966														WBGene00018784			WBGene00004830
WBGene00021070														WBGene00018788			WBGene00004831
WBGene00021072														WBGene00018798			WBGene00004854
WBGene00021075														WBGene00018835			WBGene00004855
WBGene00021125														WBGene00018857			WBGene00004856
WBGene00021146														WBGene00018869			WBGene00004860
WBGene00021201														WBGene00018872			WBGene00004873
WBGene00021260														WBGene00018891			WBGene00004875
WBGene00021332														WBGene00018892			WBGene00004876
WBGene00021338														WBGene00018898			WBGene00004877
WBGene00021345														WBGene00018953			WBGene00004878
WBGene00021368														WBGene00018964			WBGene00004880
WBGene00021403														WBGene00018966			WBGene00004888
WBGene00021407														WBGene00018974			WBGene00004895
WBGene00021435														WBGene00018976			WBGene00004897
WBGene00021437														WBGene00018984			WBGene00004910
WBGene00021448														WBGene00018995			WBGene00004912
WBGene00021527														WBGene00019004			WBGene00004913
WBGene00021545														WBGene00019005			WBGene00004914
WBGene00021615														WBGene00019074			WBGene00004916
WBGene00021662														WBGene00019125			WBGene00004917
WBGene00021679														WBGene00019126			WBGene00004920
WBGene00021691														WBGene00019168			WBGene00004921
WBGene00021702														WBGene00019196			WBGene00004927
WBGene00021721														WBGene00019217			WBGene00004929
WBGene00021745														WBGene00019220			WBGene00004930
WBGene00021751														WBGene00019230			WBGene00004931
WBGene00021759														WBGene00019246			WBGene00004932
WBGene00021766														WBGene00019328			WBGene00004947
WBGene00021793														WBGene00019365			WBGene00004951
WBGene00021797														WBGene00019403			WBGene00004959
WBGene00021877														WBGene00019404			WBGene00004969
WBGene00021897														WBGene00019427			WBGene00004978
WBGene00021939														WBGene00019460			WBGene00004980
WBGene00021943														WBGene00019481			WBGene00005007
WBGene00021983														WBGene00019498			WBGene00005014
WBGene00022000														WBGene00019536			WBGene00005015
WBGene00022006														WBGene00019537			WBGene00005019
WBGene00022007														WBGene00019628			WBGene00005020
WBGene00022014														WBGene00019629			WBGene00005021
WBGene00022026														WBGene00019656			WBGene00005022
WBGene00022073														WBGene00019678			WBGene00005023
WBGene00022103														WBGene00019682			WBGene00005025
WBGene00022106														WBGene00019686			WBGene00005026
WBGene00022110														WBGene00019725			WBGene00005077
WBGene00022155														WBGene00019726			WBGene00005078
WBGene00022177														WBGene00019766			WBGene00005643
WBGene00022189														WBGene00019771			WBGene00005647
WBGene00022203														WBGene00019806			WBGene00005648
WBGene00022219														WBGene00019832			WBGene00005662
WBGene00022223														WBGene00019888			WBGene00005663
WBGene00022235														WBGene00019962			WBGene00006059
WBGene00022236														WBGene00020004			WBGene00006061
WBGene00022247														WBGene00020017			WBGene00006062
WBGene00022257														WBGene00020088			WBGene00006064
WBGene00022289														WBGene00020092			WBGene00006307
WBGene00022307														WBGene00020112			WBGene00006308
WBGene00022397														WBGene00020191			WBGene00006309
WBGene00022427														WBGene00020222			WBGene00006349
WBGene00022429														WBGene00020231			WBGene00006351
WBGene00022489														WBGene00020235			WBGene00006352
WBGene00022538														WBGene00020251			WBGene00006364
WBGene00022571														WBGene00020254			WBGene00006367
WBGene00022575														WBGene00020266			WBGene00006373
WBGene00022577														WBGene00020296			WBGene00006382
WBGene00022580														WBGene00020320			WBGene00006383
WBGene00022592														WBGene00020334			WBGene00006386
WBGene00022613														WBGene00020348			WBGene00006387
WBGene00022634														WBGene00020366			WBGene00006397
WBGene00022641														WBGene00020374			WBGene00006405
WBGene00022643														WBGene00020423			WBGene00006407
WBGene00022682														WBGene00020490			WBGene00006410
WBGene00022709														WBGene00020553			WBGene00006411
WBGene00022741														WBGene00020572			WBGene00006412
WBGene00022753														WBGene00020588			WBGene00006414
WBGene00022770														WBGene00020601			WBGene00006415
WBGene00022840														WBGene00020612			WBGene00006416
WBGene00023410														WBGene00020658			WBGene00006432
WBGene00023423														WBGene00020705			WBGene00006433
WBGene00023451														WBGene00020706			WBGene00006434
WBGene00044044														WBGene00020757			WBGene00006435
WBGene00044078														WBGene00020782			WBGene00006437
WBGene00044281														WBGene00020821			WBGene00006439
WBGene00044302														WBGene00020825			WBGene00006443
WBGene00044355														WBGene00020837			WBGene00006446
WBGene00044528														WBGene00020839			WBGene00006447
WBGene00044620														WBGene00020868			WBGene00006448
WBGene00044623														WBGene00020902			WBGene00006460
WBGene00044674														WBGene00020924			WBGene00006461
WBGene00044705														WBGene00020930			WBGene00006463
WBGene00044760														WBGene00020937			WBGene00006465
WBGene00044791														WBGene00020953			WBGene00006470
WBGene00044798														WBGene00020964			WBGene00006472
WBGene00045103														WBGene00020989			WBGene00006473
WBGene00045215														WBGene00021058			WBGene00006474
WBGene00045339														WBGene00021059			WBGene00006477
WBGene00045379														WBGene00021061			WBGene00006478
WBGene00050893														WBGene00021073			WBGene00006479
WBGene00077490														WBGene00021128			WBGene00006481
WBGene00077655														WBGene00021133			WBGene00006490
WBGene00077680														WBGene00021176			WBGene00006491
WBGene00077688														WBGene00021185			WBGene00006493
WBGene00077697														WBGene00021200			WBGene00006494
WBGene00086546														WBGene00021276			WBGene00006497
WBGene00206373														WBGene00021295			WBGene00006498
WBGene00206487														WBGene00021311			WBGene00006503
WBGene00219376														WBGene00021312			WBGene00006510
WBGene00220250														WBGene00021324			WBGene00006512
WBGene00235289														WBGene00021327			WBGene00006515
WBGene00235310														WBGene00021344			WBGene00006518
WBGene00235369														WBGene00021346			WBGene00006520
WBGene00235383														WBGene00021349			WBGene00006525
WBGene00255594														WBGene00021354			WBGene00006526
														WBGene00021406			WBGene00006527
														WBGene00021427			WBGene00006538
														WBGene00021474			WBGene00006541
														WBGene00021475			WBGene00006563
														WBGene00021494			WBGene00006566
														WBGene00021507			WBGene00006567
														WBGene00021515			WBGene00006568
														WBGene00021536			WBGene00006573
														WBGene00021544			WBGene00006575
														WBGene00021549			WBGene00006578
														WBGene00021551			WBGene00006579
														WBGene00021660			WBGene00006594
														WBGene00021667			WBGene00006595
														WBGene00021698			WBGene00006596
														WBGene00021733			WBGene00006597
														WBGene00021748			WBGene00006598
														WBGene00021750			WBGene00006599
														WBGene00021789			WBGene00006601
														WBGene00021810			WBGene00006606
														WBGene00021816			WBGene00006609
														WBGene00021829			WBGene00006611
														WBGene00021831			WBGene00006612
														WBGene00021842			WBGene00006613
														WBGene00021857			WBGene00006615
														WBGene00021867			WBGene00006617
														WBGene00021870			WBGene00006619
														WBGene00021893			WBGene00006620
														WBGene00021902			WBGene00006626
														WBGene00021904			WBGene00006633
														WBGene00021921			WBGene00006634
														WBGene00021932			WBGene00006638
														WBGene00021960			WBGene00006647
														WBGene00021985			WBGene00006648
														WBGene00022019			WBGene00006655
														WBGene00022045			WBGene00006669
														WBGene00022046			WBGene00006696
														WBGene00022069			WBGene00006697
														WBGene00022092			WBGene00006699
														WBGene00022115			WBGene00006701
														WBGene00022129			WBGene00006702
														WBGene00022130			WBGene00006703
														WBGene00022139			WBGene00006705
														WBGene00022141			WBGene00006707
														WBGene00022170			WBGene00006708
														WBGene00022172			WBGene00006709
														WBGene00022188			WBGene00006711
														WBGene00022251			WBGene00006715
														WBGene00022273			WBGene00006716
														WBGene00022336			WBGene00006720
														WBGene00022381			WBGene00006724
														WBGene00022391			WBGene00006726
														WBGene00022401			WBGene00006728
														WBGene00022402			WBGene00006729
														WBGene00022420			WBGene00006730
														WBGene00022423			WBGene00006733
														WBGene00022460			WBGene00006734
														WBGene00022463			WBGene00006742
														WBGene00022465			WBGene00006743
														WBGene00022469			WBGene00006745
														WBGene00022471			WBGene00006746
														WBGene00022473			WBGene00006748
														WBGene00022493			WBGene00006752
														WBGene00022498			WBGene00006755
														WBGene00022518			WBGene00006757
														WBGene00022583			WBGene00006761
														WBGene00022593			WBGene00006762
														WBGene00022599			WBGene00006763
														WBGene00022616			WBGene00006767
														WBGene00022673			WBGene00006768
														WBGene00022694			WBGene00006771
														WBGene00022765			WBGene00006776
														WBGene00022792			WBGene00006781
														WBGene00022797			WBGene00006783
														WBGene00022812			WBGene00006785
														WBGene00022816			WBGene00006787
														WBGene00022837			WBGene00006789
														WBGene00022865			WBGene00006790
														WBGene00023422			WBGene00006791
														WBGene00043064			WBGene00006793
														WBGene00043986			WBGene00006795
														WBGene00044061			WBGene00006798
														WBGene00044303			WBGene00006801
														WBGene00044325			WBGene00006803
														WBGene00044326			WBGene00006805
														WBGene00044440			WBGene00006807
														WBGene00044609			WBGene00006808
														WBGene00044614			WBGene00006809
														WBGene00044734			WBGene00006810
														WBGene00044924			WBGene00006811
														WBGene00044989			WBGene00006817
														WBGene00077500			WBGene00006822
														WBGene00077521			WBGene00006823
														WBGene00077771			WBGene00006826
														WBGene00185001			WBGene00006829
														WBGene00185048			WBGene00006830
																	WBGene00006831
																	WBGene00006833
																	WBGene00006836
																	WBGene00006840
																	WBGene00006843
																	WBGene00006856
																	WBGene00006862
																	WBGene00006863
																	WBGene00006868
																	WBGene00006870
																	WBGene00006876
																	WBGene00006887
																	WBGene00006889
																	WBGene00006890
																	WBGene00006911
																	WBGene00006912
																	WBGene00006913
																	WBGene00006917
																	WBGene00006918
																	WBGene00006919
																	WBGene00006921
																	WBGene00006932
																	WBGene00006933
																	WBGene00006934
																	WBGene00006937
																	WBGene00006944
																	WBGene00006945
																	WBGene00006946
																	WBGene00006960
																	WBGene00006963
																	WBGene00006968
																	WBGene00006974
																	WBGene00006987
																	WBGene00006993
																	WBGene00006996
																	WBGene00007000
																	WBGene00007007
																	WBGene00007008
																	WBGene00007009
																	WBGene00007010
																	WBGene00007014
																	WBGene00007017
																	WBGene00007018
																	WBGene00007020
																	WBGene00007021
																	WBGene00007026
																	WBGene00007028
																	WBGene00007029
																	WBGene00007036
																	WBGene00007042
																	WBGene00007043
																	WBGene00007045
																	WBGene00007048
																	WBGene00007050
																	WBGene00007054
																	WBGene00007055
																	WBGene00007056
																	WBGene00007057
																	WBGene00007059
																	WBGene00007099
																	WBGene00007102
																	WBGene00007103
																	WBGene00007106
																	WBGene00007108
																	WBGene00007111
																	WBGene00007114
																	WBGene00007117
																	WBGene00007122
																	WBGene00007128
																	WBGene00007129
																	WBGene00007137
																	WBGene00007143
																	WBGene00007144
																	WBGene00007145
																	WBGene00007150
																	WBGene00007174
																	WBGene00007175
																	WBGene00007184
																	WBGene00007188
																	WBGene00007189
																	WBGene00007194
																	WBGene00007197
																	WBGene00007201
																	WBGene00007202
																	WBGene00007210
																	WBGene00007216
																	WBGene00007217
																	WBGene00007226
																	WBGene00007234
																	WBGene00007235
																	WBGene00007236
																	WBGene00007256
																	WBGene00007267
																	WBGene00007277
																	WBGene00007287
																	WBGene00007302
																	WBGene00007330
																	WBGene00007350
																	WBGene00007351
																	WBGene00007352
																	WBGene00007355
																	WBGene00007387
																	WBGene00007388
																	WBGene00007400
																	WBGene00007412
																	WBGene00007413
																	WBGene00007428
																	WBGene00007429
																	WBGene00007434
																	WBGene00007435
																	WBGene00007438
																	WBGene00007444
																	WBGene00007446
																	WBGene00007463
																	WBGene00007480
																	WBGene00007505
																	WBGene00007507
																	WBGene00007508
																	WBGene00007509
																	WBGene00007514
																	WBGene00007516
																	WBGene00007517
																	WBGene00007528
																	WBGene00007531
																	WBGene00007534
																	WBGene00007548
																	WBGene00007549
																	WBGene00007554
																	WBGene00007555
																	WBGene00007556
																	WBGene00007561
																	WBGene00007564
																	WBGene00007576
																	WBGene00007581
																	WBGene00007588
																	WBGene00007593
																	WBGene00007595
																	WBGene00007617
																	WBGene00007620
																	WBGene00007622
																	WBGene00007623
																	WBGene00007625
																	WBGene00007626
																	WBGene00007666
																	WBGene00007686
																	WBGene00007690
																	WBGene00007696
																	WBGene00007703
																	WBGene00007707
																	WBGene00007712
																	WBGene00007730
																	WBGene00007744
																	WBGene00007745
																	WBGene00007752
																	WBGene00007753
																	WBGene00007755
																	WBGene00007784
																	WBGene00007787
																	WBGene00007799
																	WBGene00007801
																	WBGene00007812
																	WBGene00007836
																	WBGene00007848
																	WBGene00007860
																	WBGene00007878
																	WBGene00007882
																	WBGene00007886
																	WBGene00007904
																	WBGene00007917
																	WBGene00007918
																	WBGene00007922
																	WBGene00007924
																	WBGene00007927
																	WBGene00007941
																	WBGene00007942
																	WBGene00007952
																	WBGene00007953
																	WBGene00007956
																	WBGene00007959
																	WBGene00007969
																	WBGene00007971
																	WBGene00007972
																	WBGene00007974
																	WBGene00007979
																	WBGene00007980
																	WBGene00007982
																	WBGene00007993
																	WBGene00008000
																	WBGene00008006
																	WBGene00008008
																	WBGene00008018
																	WBGene00008019
																	WBGene00008033
																	WBGene00008041
																	WBGene00008052
																	WBGene00008053
																	WBGene00008078
																	WBGene00008117
																	WBGene00008119
																	WBGene00008121
																	WBGene00008131
																	WBGene00008132
																	WBGene00008133
																	WBGene00008136
																	WBGene00008148
																	WBGene00008149
																	WBGene00008151
																	WBGene00008164
																	WBGene00008165
																	WBGene00008167
																	WBGene00008205
																	WBGene00008220
																	WBGene00008225
																	WBGene00008237
																	WBGene00008239
																	WBGene00008258
																	WBGene00008273
																	WBGene00008288
																	WBGene00008311
																	WBGene00008317
																	WBGene00008320
																	WBGene00008338
																	WBGene00008339
																	WBGene00008345
																	WBGene00008354
																	WBGene00008364
																	WBGene00008366
																	WBGene00008370
																	WBGene00008371
																	WBGene00008379
																	WBGene00008386
																	WBGene00008398
																	WBGene00008402
																	WBGene00008405
																	WBGene00008408
																	WBGene00008410
																	WBGene00008411
																	WBGene00008412
																	WBGene00008415
																	WBGene00008419
																	WBGene00008425
																	WBGene00008430
																	WBGene00008431
																	WBGene00008435
																	WBGene00008439
																	WBGene00008452
																	WBGene00008455
																	WBGene00008456
																	WBGene00008480
																	WBGene00008502
																	WBGene00008505
																	WBGene00008506
																	WBGene00008514
																	WBGene00008531
																	WBGene00008532
																	WBGene00008538
																	WBGene00008546
																	WBGene00008547
																	WBGene00008548
																	WBGene00008564
																	WBGene00008565
																	WBGene00008566
																	WBGene00008567
																	WBGene00008571
																	WBGene00008586
																	WBGene00008606
																	WBGene00008624
																	WBGene00008639
																	WBGene00008642
																	WBGene00008645
																	WBGene00008646
																	WBGene00008654
																	WBGene00008664
																	WBGene00008685
																	WBGene00008686
																	WBGene00008693
																	WBGene00008694
																	WBGene00008706
																	WBGene00008729
																	WBGene00008733
																	WBGene00008741
																	WBGene00008765
																	WBGene00008766
																	WBGene00008767
																	WBGene00008769
																	WBGene00008774
																	WBGene00008775
																	WBGene00008780
																	WBGene00008781
																	WBGene00008800
																	WBGene00008806
																	WBGene00008809
																	WBGene00008810
																	WBGene00008819
																	WBGene00008832
																	WBGene00008852
																	WBGene00008856
																	WBGene00008876
																	WBGene00008877
																	WBGene00008919
																	WBGene00008920
																	WBGene00008924
																	WBGene00008927
																	WBGene00008939
																	WBGene00008950
																	WBGene00008956
																	WBGene00008959
																	WBGene00008974
																	WBGene00008979
																	WBGene00008999
																	WBGene00009002
																	WBGene00009006
																	WBGene00009007
																	WBGene00009010
																	WBGene00009012
																	WBGene00009023
																	WBGene00009035
																	WBGene00009045
																	WBGene00009048
																	WBGene00009049
																	WBGene00009050
																	WBGene00009051
																	WBGene00009057
																	WBGene00009064
																	WBGene00009065
																	WBGene00009082
																	WBGene00009084
																	WBGene00009092
																	WBGene00009100
																	WBGene00009116
																	WBGene00009119
																	WBGene00009120
																	WBGene00009122
																	WBGene00009123
																	WBGene00009124
																	WBGene00009126
																	WBGene00009131
																	WBGene00009138
																	WBGene00009140
																	WBGene00009145
																	WBGene00009155
																	WBGene00009158
																	WBGene00009163
																	WBGene00009164
																	WBGene00009172
																	WBGene00009177
																	WBGene00009186
																	WBGene00009187
																	WBGene00009207
																	WBGene00009211
																	WBGene00009218
																	WBGene00009232
																	WBGene00009246
																	WBGene00009260
																	WBGene00009262
																	WBGene00009264
																	WBGene00009266
																	WBGene00009277
																	WBGene00009285
																	WBGene00009287
																	WBGene00009290
																	WBGene00009292
																	WBGene00009305
																	WBGene00009319
																	WBGene00009320
																	WBGene00009322
																	WBGene00009334
																	WBGene00009335
																	WBGene00009336
																	WBGene00009342
																	WBGene00009352
																	WBGene00009354
																	WBGene00009366
																	WBGene00009368
																	WBGene00009369
																	WBGene00009372
																	WBGene00009436
																	WBGene00009439
																	WBGene00009440
																	WBGene00009441
																	WBGene00009450
																	WBGene00009452
																	WBGene00009478
																	WBGene00009498
																	WBGene00009503
																	WBGene00009521
																	WBGene00009531
																	WBGene00009542
																	WBGene00009552
																	WBGene00009554
																	WBGene00009557
																	WBGene00009559
																	WBGene00009563
																	WBGene00009574
																	WBGene00009575
																	WBGene00009580
																	WBGene00009583
																	WBGene00009617
																	WBGene00009618
																	WBGene00009619
																	WBGene00009622
																	WBGene00009628
																	WBGene00009635
																	WBGene00009647
																	WBGene00009654
																	WBGene00009658
																	WBGene00009664
																	WBGene00009666
																	WBGene00009668
																	WBGene00009671
																	WBGene00009672
																	WBGene00009674
																	WBGene00009681
																	WBGene00009711
																	WBGene00009726
																	WBGene00009732
																	WBGene00009734
																	WBGene00009736
																	WBGene00009769
																	WBGene00009771
																	WBGene00009772
																	WBGene00009776
																	WBGene00009781
																	WBGene00009783
																	WBGene00009784
																	WBGene00009793
																	WBGene00009812
																	WBGene00009813
																	WBGene00009829
																	WBGene00009831
																	WBGene00009867
																	WBGene00009902
																	WBGene00009903
																	WBGene00009918
																	WBGene00009919
																	WBGene00009920
																	WBGene00009925
																	WBGene00009944
																	WBGene00009947
																	WBGene00009952
																	WBGene00009966
																	WBGene00009976
																	WBGene00009978
																	WBGene00009987
																	WBGene00009992
																	WBGene00010015
																	WBGene00010035
																	WBGene00010038
																	WBGene00010040
																	WBGene00010042
																	WBGene00010044
																	WBGene00010045
																	WBGene00010052
																	WBGene00010054
																	WBGene00010055
																	WBGene00010061
																	WBGene00010062
																	WBGene00010075
																	WBGene00010083
																	WBGene00010089
																	WBGene00010094
																	WBGene00010097
																	WBGene00010111
																	WBGene00010130
																	WBGene00010131
																	WBGene00010160
																	WBGene00010166
																	WBGene00010178
																	WBGene00010197
																	WBGene00010214
																	WBGene00010232
																	WBGene00010233
																	WBGene00010260
																	WBGene00010272
																	WBGene00010279
																	WBGene00010283
																	WBGene00010284
																	WBGene00010286
																	WBGene00010296
																	WBGene00010303
																	WBGene00010308
																	WBGene00010317
																	WBGene00010325
																	WBGene00010326
																	WBGene00010333
																	WBGene00010336
																	WBGene00010369
																	WBGene00010370
																	WBGene00010386
																	WBGene00010397
																	WBGene00010405
																	WBGene00010406
																	WBGene00010408
																	WBGene00010423
																	WBGene00010428
																	WBGene00010435
																	WBGene00010436
																	WBGene00010437
																	WBGene00010444
																	WBGene00010450
																	WBGene00010459
																	WBGene00010478
																	WBGene00010480
																	WBGene00010481
																	WBGene00010484
																	WBGene00010485
																	WBGene00010488
																	WBGene00010496
																	WBGene00010537
																	WBGene00010540
																	WBGene00010556
																	WBGene00010564
																	WBGene00010565
																	WBGene00010589
																	WBGene00010595
																	WBGene00010615
																	WBGene00010622
																	WBGene00010627
																	WBGene00010628
																	WBGene00010629
																	WBGene00010631
																	WBGene00010664
																	WBGene00010665
																	WBGene00010670
																	WBGene00010685
																	WBGene00010697
																	WBGene00010699
																	WBGene00010705
																	WBGene00010706
																	WBGene00010707
																	WBGene00010713
																	WBGene00010720
																	WBGene00010721
																	WBGene00010725
																	WBGene00010734
																	WBGene00010757
																	WBGene00010758
																	WBGene00010769
																	WBGene00010776
																	WBGene00010778
																	WBGene00010785
																	WBGene00010788
																	WBGene00010789
																	WBGene00010794
																	WBGene00010803
																	WBGene00010805
																	WBGene00010809
																	WBGene00010810
																	WBGene00010811
																	WBGene00010813
																	WBGene00010815
																	WBGene00010838
																	WBGene00010839
																	WBGene00010842
																	WBGene00010844
																	WBGene00010846
																	WBGene00010847
																	WBGene00010872
																	WBGene00010875
																	WBGene00010882
																	WBGene00010889
																	WBGene00010892
																	WBGene00010896
																	WBGene00010911
																	WBGene00010912
																	WBGene00010924
																	WBGene00010941
																	WBGene00010974
																	WBGene00010983
																	WBGene00010984
																	WBGene00010988
																	WBGene00011003
																	WBGene00011004
																	WBGene00011029
																	WBGene00011032
																	WBGene00011038
																	WBGene00011050
																	WBGene00011065
																	WBGene00011071
																	WBGene00011083
																	WBGene00011089
																	WBGene00011095
																	WBGene00011106
																	WBGene00011110
																	WBGene00011111
																	WBGene00011116
																	WBGene00011119
																	WBGene00011122
																	WBGene00011128
																	WBGene00011142
																	WBGene00011147
																	WBGene00011201
																	WBGene00011216
																	WBGene00011224
																	WBGene00011226
																	WBGene00011232
																	WBGene00011237
																	WBGene00011239
																	WBGene00011250
																	WBGene00011253
																	WBGene00011261
																	WBGene00011269
																	WBGene00011271
																	WBGene00011272
																	WBGene00011274
																	WBGene00011275
																	WBGene00011280
																	WBGene00011281
																	WBGene00011302
																	WBGene00011303
																	WBGene00011304
																	WBGene00011305
																	WBGene00011306
																	WBGene00011307
																	WBGene00011329
																	WBGene00011344
																	WBGene00011352
																	WBGene00011368
																	WBGene00011391
																	WBGene00011393
																	WBGene00011398
																	WBGene00011399
																	WBGene00011407
																	WBGene00011409
																	WBGene00011412
																	WBGene00011417
																	WBGene00011420
																	WBGene00011440
																	WBGene00011449
																	WBGene00011451
																	WBGene00011474
																	WBGene00011480
																	WBGene00011482
																	WBGene00011488
																	WBGene00011493
																	WBGene00011500
																	WBGene00011502
																	WBGene00011510
																	WBGene00011517
																	WBGene00011524
																	WBGene00011526
																	WBGene00011529
																	WBGene00011538
																	WBGene00011543
																	WBGene00011579
																	WBGene00011582
																	WBGene00011590
																	WBGene00011605
																	WBGene00011612
																	WBGene00011625
																	WBGene00011629
																	WBGene00011637
																	WBGene00011638
																	WBGene00011642
																	WBGene00011648
																	WBGene00011662
																	WBGene00011671
																	WBGene00011672
																	WBGene00011674
																	WBGene00011675
																	WBGene00011677
																	WBGene00011687
																	WBGene00011697
																	WBGene00011705
																	WBGene00011717
																	WBGene00011718
																	WBGene00011719
																	WBGene00011722
																	WBGene00011731
																	WBGene00011734
																	WBGene00011735
																	WBGene00011758
																	WBGene00011761
																	WBGene00011767
																	WBGene00011771
																	WBGene00011775
																	WBGene00011791
																	WBGene00011814
																	WBGene00011815
																	WBGene00011821
																	WBGene00011826
																	WBGene00011827
																	WBGene00011832
																	WBGene00011850
																	WBGene00011858
																	WBGene00011860
																	WBGene00011867
																	WBGene00011872
																	WBGene00011884
																	WBGene00011892
																	WBGene00011904
																	WBGene00011912
																	WBGene00011914
																	WBGene00011917
																	WBGene00011923
																	WBGene00011935
																	WBGene00011938
																	WBGene00011944
																	WBGene00011962
																	WBGene00011967
																	WBGene00011975
																	WBGene00011976
																	WBGene00011995
																	WBGene00012000
																	WBGene00012004
																	WBGene00012007
																	WBGene00012015
																	WBGene00012017
																	WBGene00012019
																	WBGene00012020
																	WBGene00012030
																	WBGene00012031
																	WBGene00012033
																	WBGene00012037
																	WBGene00012059
																	WBGene00012095
																	WBGene00012097
																	WBGene00012105
																	WBGene00012126
																	WBGene00012127
																	WBGene00012128
																	WBGene00012142
																	WBGene00012144
																	WBGene00012148
																	WBGene00012187
																	WBGene00012192
																	WBGene00012193
																	WBGene00012203
																	WBGene00012204
																	WBGene00012205
																	WBGene00012208
																	WBGene00012225
																	WBGene00012230
																	WBGene00012258
																	WBGene00012298
																	WBGene00012316
																	WBGene00012319
																	WBGene00012337
																	WBGene00012341
																	WBGene00012344
																	WBGene00012348
																	WBGene00012351
																	WBGene00012353
																	WBGene00012360
																	WBGene00012361
																	WBGene00012362
																	WBGene00012370
																	WBGene00012375
																	WBGene00012386
																	WBGene00012390
																	WBGene00012448
																	WBGene00012458
																	WBGene00012459
																	WBGene00012460
																	WBGene00012463
																	WBGene00012476
																	WBGene00012479
																	WBGene00012497
																	WBGene00012514
																	WBGene00012518
																	WBGene00012528
																	WBGene00012530
																	WBGene00012538
																	WBGene00012543
																	WBGene00012544
																	WBGene00012550
																	WBGene00012553
																	WBGene00012555
																	WBGene00012556
																	WBGene00012559
																	WBGene00012578
																	WBGene00012606
																	WBGene00012608
																	WBGene00012638
																	WBGene00012641
[truncated: 1,255 more rows]

## Sheet: C) OL1.1
OrthoList 1.1 (7812)		Uniques (1,863)	Two (1,107)	Three (1,588)	Four (3,254)		Lost (287)
WBGene00000001		WBGene00000037	WBGene00000023	WBGene00000003	WBGene00000001		WBGene00000223
WBGene00000002		WBGene00000038	WBGene00000036	WBGene00000018	WBGene00000002		WBGene00000250
WBGene00000003		WBGene00000042	WBGene00000046	WBGene00000055	WBGene00000004		WBGene00000267
WBGene00000004		WBGene00000043	WBGene00000048	WBGene00000067	WBGene00000020		WBGene00000425
WBGene00000018		WBGene00000044	WBGene00000049	WBGene00000071	WBGene00000022		WBGene00000487
WBGene00000020		WBGene00000045	WBGene00000050	WBGene00000095	WBGene00000035		WBGene00000551
WBGene00000022		WBGene00000047	WBGene00000053	WBGene00000096	WBGene00000039		WBGene00000562
WBGene00000023		WBGene00000051	WBGene00000058	WBGene00000101	WBGene00000040		WBGene00000563
WBGene00000035		WBGene00000054	WBGene00000069	WBGene00000118	WBGene00000041		WBGene00000905
WBGene00000036		WBGene00000056	WBGene00000073	WBGene00000137	WBGene00000060		WBGene00001214
WBGene00000037		WBGene00000057	WBGene00000100	WBGene00000139	WBGene00000063		WBGene00001240
WBGene00000038		WBGene00000059	WBGene00000121	WBGene00000140	WBGene00000064		WBGene00001345
WBGene00000039		WBGene00000061	WBGene00000122	WBGene00000143	WBGene00000065		WBGene00001598
WBGene00000040		WBGene00000062	WBGene00000145	WBGene00000150	WBGene00000066		WBGene00001599
WBGene00000041		WBGene00000070	WBGene00000146	WBGene00000162	WBGene00000068		WBGene00001600
WBGene00000042		WBGene00000079	WBGene00000169	WBGene00000163	WBGene00000072		WBGene00001601
WBGene00000043		WBGene00000082	WBGene00000173	WBGene00000166	WBGene00000074		WBGene00001653
WBGene00000044		WBGene00000083	WBGene00000176	WBGene00000206	WBGene00000075		WBGene00001726
WBGene00000045		WBGene00000093	WBGene00000177	WBGene00000207	WBGene00000080		WBGene00001732
WBGene00000046		WBGene00000098	WBGene00000202	WBGene00000222	WBGene00000081		WBGene00001852
WBGene00000047		WBGene00000120	WBGene00000209	WBGene00000224	WBGene00000086		WBGene00001869
WBGene00000048		WBGene00000138	WBGene00000210	WBGene00000225	WBGene00000089		WBGene00002220
WBGene00000049		WBGene00000144	WBGene00000211	WBGene00000228	WBGene00000090		WBGene00002827
WBGene00000050		WBGene00000156	WBGene00000213	WBGene00000231	WBGene00000092		WBGene00003002
WBGene00000051		WBGene00000178	WBGene00000216	WBGene00000232	WBGene00000097		WBGene00003031
WBGene00000053		WBGene00000190	WBGene00000226	WBGene00000233	WBGene00000099		WBGene00003087
WBGene00000054		WBGene00000196	WBGene00000227	WBGene00000241	WBGene00000102		WBGene00003236
WBGene00000055		WBGene00000214	WBGene00000236	WBGene00000248	WBGene00000103		WBGene00003499
WBGene00000056		WBGene00000215	WBGene00000249	WBGene00000254	WBGene00000105		WBGene00003507
WBGene00000057		WBGene00000218	WBGene00000262	WBGene00000257	WBGene00000106		WBGene00003520
WBGene00000058		WBGene00000219	WBGene00000265	WBGene00000259	WBGene00000107		WBGene00003521
WBGene00000059		WBGene00000220	WBGene00000274	WBGene00000270	WBGene00000108		WBGene00003522
WBGene00000060		WBGene00000238	WBGene00000277	WBGene00000279	WBGene00000109		WBGene00003524
WBGene00000061		WBGene00000239	WBGene00000282	WBGene00000281	WBGene00000110		WBGene00003525
WBGene00000062		WBGene00000251	WBGene00000386	WBGene00000294	WBGene00000111		WBGene00003531
WBGene00000063		WBGene00000252	WBGene00000388	WBGene00000296	WBGene00000112		WBGene00003591
WBGene00000064		WBGene00000256	WBGene00000401	WBGene00000301	WBGene00000113		WBGene00003785
WBGene00000065		WBGene00000275	WBGene00000411	WBGene00000366	WBGene00000114		WBGene00003790
WBGene00000066		WBGene00000389	WBGene00000421	WBGene00000367	WBGene00000115		WBGene00003792
WBGene00000067		WBGene00000395	WBGene00000428	WBGene00000371	WBGene00000116		WBGene00003801
WBGene00000068		WBGene00000399	WBGene00000430	WBGene00000382	WBGene00000117		WBGene00004004
WBGene00000069		WBGene00000402	WBGene00000433	WBGene00000387	WBGene00000123		WBGene00004057
WBGene00000070		WBGene00000412	WBGene00000436	WBGene00000391	WBGene00000142		WBGene00004114
WBGene00000071		WBGene00000414	WBGene00000441	WBGene00000392	WBGene00000147		WBGene00004115
WBGene00000072		WBGene00000423	WBGene00000448	WBGene00000393	WBGene00000148		WBGene00004132
WBGene00000073		WBGene00000432	WBGene00000449	WBGene00000397	WBGene00000149		WBGene00004146
WBGene00000074		WBGene00000440	WBGene00000453	WBGene00000406	WBGene00000155		WBGene00004349
WBGene00000075		WBGene00000442	WBGene00000458	WBGene00000413	WBGene00000157		WBGene00004508
WBGene00000079		WBGene00000446	WBGene00000468	WBGene00000417	WBGene00000158		WBGene00004509
WBGene00000080		WBGene00000450	WBGene00000469	WBGene00000424	WBGene00000159		WBGene00004510
WBGene00000081		WBGene00000457	WBGene00000472	WBGene00000429	WBGene00000160		WBGene00004765
WBGene00000082		WBGene00000461	WBGene00000473	WBGene00000431	WBGene00000161		WBGene00004928
WBGene00000083		WBGene00000477	WBGene00000474	WBGene00000435	WBGene00000164		WBGene00006050
WBGene00000086		WBGene00000511	WBGene00000475	WBGene00000437	WBGene00000165		WBGene00006051
WBGene00000089		WBGene00000512	WBGene00000483	WBGene00000438	WBGene00000170		WBGene00006052
WBGene00000090		WBGene00000513	WBGene00000509	WBGene00000439	WBGene00000171		WBGene00006053
WBGene00000092		WBGene00000514	WBGene00000520	WBGene00000445	WBGene00000172		WBGene00006375
WBGene00000093		WBGene00000517	WBGene00000521	WBGene00000447	WBGene00000174		WBGene00006450
WBGene00000095		WBGene00000535	WBGene00000527	WBGene00000451	WBGene00000175		WBGene00006499
WBGene00000096		WBGene00000537	WBGene00000528	WBGene00000452	WBGene00000180		WBGene00006656
WBGene00000097		WBGene00000548	WBGene00000529	WBGene00000454	WBGene00000181		WBGene00006719
WBGene00000098		WBGene00000594	WBGene00000534	WBGene00000463	WBGene00000182		WBGene00006784
WBGene00000099		WBGene00000596	WBGene00000564	WBGene00000464	WBGene00000183		WBGene00006864
WBGene00000100		WBGene00000597	WBGene00000583	WBGene00000476	WBGene00000184		WBGene00006947
WBGene00000101		WBGene00000599	WBGene00000603	WBGene00000481	WBGene00000187		WBGene00006948
WBGene00000102		WBGene00000601	WBGene00000625	WBGene00000491	WBGene00000188		WBGene00006950
WBGene00000103		WBGene00000602	WBGene00000770	WBGene00000493	WBGene00000189		WBGene00006952
WBGene00000105		WBGene00000606	WBGene00000771	WBGene00000507	WBGene00000192		WBGene00006953
WBGene00000106		WBGene00000608	WBGene00000772	WBGene00000508	WBGene00000193		WBGene00006954
WBGene00000107		WBGene00000611	WBGene00000777	WBGene00000531	WBGene00000195		WBGene00006955
WBGene00000108		WBGene00000612	WBGene00000780	WBGene00000544	WBGene00000197		WBGene00007068
WBGene00000109		WBGene00000614	WBGene00000782	WBGene00000552	WBGene00000198		WBGene00007141
WBGene00000110		WBGene00000615	WBGene00000784	WBGene00000553	WBGene00000199		WBGene00007153
WBGene00000111		WBGene00000616	WBGene00000795	WBGene00000584	WBGene00000200		WBGene00007307
WBGene00000112		WBGene00000617	WBGene00000803	WBGene00000708	WBGene00000201		WBGene00007356
WBGene00000113		WBGene00000618	WBGene00000819	WBGene00000774	WBGene00000203		WBGene00007362
WBGene00000114		WBGene00000620	WBGene00000829	WBGene00000785	WBGene00000204		WBGene00007602
WBGene00000115		WBGene00000622	WBGene00000835	WBGene00000786	WBGene00000205		WBGene00007764
WBGene00000116		WBGene00000626	WBGene00000839	WBGene00000792	WBGene00000208		WBGene00007820
WBGene00000117		WBGene00000627	WBGene00000841	WBGene00000793	WBGene00000212		WBGene00007846
WBGene00000118		WBGene00000631	WBGene00000863	WBGene00000796	WBGene00000217		WBGene00007847
WBGene00000120		WBGene00000634	WBGene00000868	WBGene00000813	WBGene00000229		WBGene00008065
WBGene00000121		WBGene00000636	WBGene00000878	WBGene00000814	WBGene00000230		WBGene00008144
WBGene00000122		WBGene00000637	WBGene00000879	WBGene00000815	WBGene00000235		WBGene00008159
WBGene00000123		WBGene00000638	WBGene00000883	WBGene00000816	WBGene00000240		WBGene00008161
WBGene00000137		WBGene00000639	WBGene00000894	WBGene00000854	WBGene00000242		WBGene00008162
WBGene00000138		WBGene00000640	WBGene00000895	WBGene00000865	WBGene00000244		WBGene00008291
WBGene00000139		WBGene00000641	WBGene00000897	WBGene00000866	WBGene00000246		WBGene00008478
WBGene00000140		WBGene00000644	WBGene00000912	WBGene00000867	WBGene00000247		WBGene00008533
WBGene00000142		WBGene00000645	WBGene00000913	WBGene00000870	WBGene00000253		WBGene00008707
WBGene00000143		WBGene00000647	WBGene00000935	WBGene00000871	WBGene00000266		WBGene00008714
WBGene00000144		WBGene00000648	WBGene00000961	WBGene00000872	WBGene00000269		WBGene00008762
WBGene00000145		WBGene00000649	WBGene00000968	WBGene00000875	WBGene00000271		WBGene00008787
WBGene00000146		WBGene00000650	WBGene00001036	WBGene00000876	WBGene00000276		WBGene00008829
WBGene00000147		WBGene00000651	WBGene00001061	WBGene00000877	WBGene00000280		WBGene00008891
WBGene00000148		WBGene00000653	WBGene00001081	WBGene00000884	WBGene00000283		WBGene00008910
WBGene00000149		WBGene00000654	WBGene00001086	WBGene00000900	WBGene00000289		WBGene00008932
WBGene00000150		WBGene00000655	WBGene00001088	WBGene00000903	WBGene00000292		WBGene00009009
WBGene00000155		WBGene00000656	WBGene00001096	WBGene00000911	WBGene00000293		WBGene00009251
WBGene00000156		WBGene00000657	WBGene00001106	WBGene00000929	WBGene00000295		WBGene00009362
WBGene00000157		WBGene00000659	WBGene00001116	WBGene00000931	WBGene00000298		WBGene00009578
WBGene00000158		WBGene00000660	WBGene00001145	WBGene00000938	WBGene00000368		WBGene00009582
WBGene00000159		WBGene00000661	WBGene00001156	WBGene00000941	WBGene00000369		WBGene00009587
WBGene00000160		WBGene00000663	WBGene00001178	WBGene00000942	WBGene00000372		WBGene00009743
WBGene00000161		WBGene00000664	WBGene00001204	WBGene00000950	WBGene00000373		WBGene00009796
WBGene00000162		WBGene00000665	WBGene00001210	WBGene00000952	WBGene00000375		WBGene00009897
WBGene00000163		WBGene00000666	WBGene00001242	WBGene00000972	WBGene00000376		WBGene00009937
WBGene00000164		WBGene00000667	WBGene00001337	WBGene00000985	WBGene00000377		WBGene00009942
WBGene00000165		WBGene00000668	WBGene00001374	WBGene00000989	WBGene00000378		WBGene00010155
WBGene00000166		WBGene00000669	WBGene00001429	WBGene00000991	WBGene00000379		WBGene00010409
WBGene00000169		WBGene00000670	WBGene00001432	WBGene00000994	WBGene00000380		WBGene00010626
WBGene00000170		WBGene00000671	WBGene00001438	WBGene00001002	WBGene00000381		WBGene00010766
WBGene00000171		WBGene00000674	WBGene00001439	WBGene00001008	WBGene00000383		WBGene00010770
WBGene00000172		WBGene00000675	WBGene00001479	WBGene00001017	WBGene00000390		WBGene00010796
WBGene00000173		WBGene00000676	WBGene00001483	WBGene00001022	WBGene00000396		WBGene00010828
WBGene00000174		WBGene00000678	WBGene00001484	WBGene00001028	WBGene00000403		WBGene00010888
WBGene00000175		WBGene00000679	WBGene00001486	WBGene00001032	WBGene00000405		WBGene00010913
WBGene00000176		WBGene00000680	WBGene00001490	WBGene00001037	WBGene00000407		WBGene00011059
WBGene00000177		WBGene00000681	WBGene00001491	WBGene00001040	WBGene00000408		WBGene00011266
WBGene00000178		WBGene00000682	WBGene00001493	WBGene00001049	WBGene00000409		WBGene00011291
WBGene00000180		WBGene00000685	WBGene00001538	WBGene00001053	WBGene00000410		WBGene00011313
WBGene00000181		WBGene00000687	WBGene00001552	WBGene00001080	WBGene00000415		WBGene00011372
WBGene00000182		WBGene00000690	WBGene00001554	WBGene00001087	WBGene00000416		WBGene00011381
WBGene00000183		WBGene00000691	WBGene00001555	WBGene00001102	WBGene00000419		WBGene00011382
WBGene00000184		WBGene00000692	WBGene00001556	WBGene00001121	WBGene00000420		WBGene00011414
WBGene00000187		WBGene00000693	WBGene00001560	WBGene00001122	WBGene00000422		WBGene00011424
WBGene00000188		WBGene00000694	WBGene00001568	WBGene00001127	WBGene00000426		WBGene00011444
WBGene00000189		WBGene00000696	WBGene00001574	WBGene00001131	WBGene00000443		WBGene00011469
WBGene00000190		WBGene00000697	WBGene00001596	WBGene00001132	WBGene00000466		WBGene00011578
WBGene00000192		WBGene00000698	WBGene00001602	WBGene00001161	WBGene00000478		WBGene00011636
WBGene00000193		WBGene00000699	WBGene00001609	WBGene00001163	WBGene00000479		WBGene00011659
WBGene00000195		WBGene00000700	WBGene00001622	WBGene00001166	WBGene00000480		WBGene00011665
WBGene00000196		WBGene00000701	WBGene00001624	WBGene00001168	WBGene00000482		WBGene00011698
WBGene00000197		WBGene00000703	WBGene00001630	WBGene00001169	WBGene00000484		WBGene00011699
WBGene00000198		WBGene00000704	WBGene00001666	WBGene00001171	WBGene00000485		WBGene00011742
WBGene00000199		WBGene00000705	WBGene00001681	WBGene00001194	WBGene00000490		WBGene00011780
WBGene00000200		WBGene00000706	WBGene00001750	WBGene00001207	WBGene00000492		WBGene00011890
WBGene00000201		WBGene00000707	WBGene00001751	WBGene00001215	WBGene00000498		WBGene00011948
WBGene00000202		WBGene00000710	WBGene00001754	WBGene00001225	WBGene00000499		WBGene00011949
WBGene00000203		WBGene00000711	WBGene00001755	WBGene00001235	WBGene00000500		WBGene00012121
WBGene00000204		WBGene00000713	WBGene00001757	WBGene00001249	WBGene00000501		WBGene00012188
WBGene00000205		WBGene00000714	WBGene00001760	WBGene00001281	WBGene00000502		WBGene00012317
WBGene00000206		WBGene00000715	WBGene00001761	WBGene00001320	WBGene00000503		WBGene00012457
WBGene00000207		WBGene00000716	WBGene00001762	WBGene00001329	WBGene00000506		WBGene00012474
WBGene00000208		WBGene00000717	WBGene00001763	WBGene00001332	WBGene00000510		WBGene00012610
WBGene00000209		WBGene00000718	WBGene00001765	WBGene00001365	WBGene00000515		WBGene00012664
WBGene00000210		WBGene00000719	WBGene00001766	WBGene00001371	WBGene00000518		WBGene00012757
WBGene00000211		WBGene00000720	WBGene00001768	WBGene00001372	WBGene00000519		WBGene00012791
WBGene00000212		WBGene00000721	WBGene00001770	WBGene00001397	WBGene00000530		WBGene00012802
WBGene00000213		WBGene00000722	WBGene00001772	WBGene00001398	WBGene00000532		WBGene00012826
WBGene00000214		WBGene00000723	WBGene00001773	WBGene00001399	WBGene00000533		WBGene00012942
WBGene00000215		WBGene00000724	WBGene00001774	WBGene00001410	WBGene00000536		WBGene00013021
WBGene00000216		WBGene00000725	WBGene00001775	WBGene00001412	WBGene00000539		WBGene00013049
WBGene00000217		WBGene00000726	WBGene00001778	WBGene00001423	WBGene00000540		WBGene00013100
WBGene00000218		WBGene00000727	WBGene00001779	WBGene00001425	WBGene00000541		WBGene00013138
WBGene00000219		WBGene00000728	WBGene00001781	WBGene00001427	WBGene00000542		WBGene00013240
WBGene00000220		WBGene00000729	WBGene00001782	WBGene00001428	WBGene00000543		WBGene00013273
WBGene00000222		WBGene00000730	WBGene00001783	WBGene00001430	WBGene00000545		WBGene00013307
WBGene00000224		WBGene00000731	WBGene00001784	WBGene00001434	WBGene00000546		WBGene00013325
WBGene00000225		WBGene00000732	WBGene00001785	WBGene00001470	WBGene00000547		WBGene00013350
WBGene00000226		WBGene00000733	WBGene00001787	WBGene00001487	WBGene00000549		WBGene00013351
WBGene00000227		WBGene00000734	WBGene00001795	WBGene00001488	WBGene00000550		WBGene00013359
WBGene00000228		WBGene00000735	WBGene00001796	WBGene00001489	WBGene00000554		WBGene00013507
WBGene00000229		WBGene00000737	WBGene00001824	WBGene00001492	WBGene00000561		WBGene00013581
WBGene00000230		WBGene00000738	WBGene00001829	WBGene00001496	WBGene00000565		WBGene00013583
WBGene00000231		WBGene00000739	WBGene00001830	WBGene00001498	WBGene00000566		WBGene00013700
WBGene00000232		WBGene00000740	WBGene00001833	WBGene00001500	WBGene00000567		WBGene00013782
WBGene00000233		WBGene00000741	WBGene00001851	WBGene00001501	WBGene00000585		WBGene00014035
WBGene00000235		WBGene00000742	WBGene00001853	WBGene00001505	WBGene00000591		WBGene00014078
WBGene00000236		WBGene00000743	WBGene00001854	WBGene00001507	WBGene00000761		WBGene00014233
WBGene00000238		WBGene00000744	WBGene00001855	WBGene00001513	WBGene00000762		WBGene00015040
WBGene00000239		WBGene00000745	WBGene00001856	WBGene00001516	WBGene00000763		WBGene00015041
WBGene00000240		WBGene00000746	WBGene00001857	WBGene00001559	WBGene00000764		WBGene00015042
WBGene00000241		WBGene00000747	WBGene00001862	WBGene00001591	WBGene00000765		WBGene00015043
WBGene00000242		WBGene00000748	WBGene00001865	WBGene00001592	WBGene00000766		WBGene00015044
WBGene00000244		WBGene00000749	WBGene00001898	WBGene00001593	WBGene00000767		WBGene00015045
WBGene00000246		WBGene00000750	WBGene00001914	WBGene00001604	WBGene00000768		WBGene00015131
WBGene00000247		WBGene00000751	WBGene00001943	WBGene00001614	WBGene00000773		WBGene00015330
WBGene00000248		WBGene00000752	WBGene00001946	WBGene00001615	WBGene00000776		WBGene00015399
WBGene00000249		WBGene00000753	WBGene00001948	WBGene00001616	WBGene00000778		WBGene00015400
WBGene00000251		WBGene00000754	WBGene00001949	WBGene00001623	WBGene00000787		WBGene00015457
WBGene00000252		WBGene00000755	WBGene00001950	WBGene00001647	WBGene00000788		WBGene00015458
WBGene00000253		WBGene00000757	WBGene00001961	WBGene00001678	WBGene00000794		WBGene00015559
WBGene00000254		WBGene00000759	WBGene00001975	WBGene00001682	WBGene00000798		WBGene00015641
WBGene00000256		WBGene00000775	WBGene00001994	WBGene00001707	WBGene00000799		WBGene00015642
WBGene00000257		WBGene00000779	WBGene00002012	WBGene00001749	WBGene00000800		WBGene00015649
WBGene00000259		WBGene00000781	WBGene00002013	WBGene00001752	WBGene00000802		WBGene00015689
WBGene00000262		WBGene00000783	WBGene00002015	WBGene00001753	WBGene00000812		WBGene00015841
WBGene00000265		WBGene00000789	WBGene00002016	WBGene00001756	WBGene00000817		WBGene00015957
WBGene00000266		WBGene00000797	WBGene00002017	WBGene00001764	WBGene00000818		WBGene00016024
WBGene00000269		WBGene00000820	WBGene00002023	WBGene00001767	WBGene00000822		WBGene00016032
WBGene00000270		WBGene00000821	WBGene00002027	WBGene00001769	WBGene00000830		WBGene00016037
WBGene00000271		WBGene00000885	WBGene00002030	WBGene00001771	WBGene00000831		WBGene00016120
WBGene00000274		WBGene00000899	WBGene00002176	WBGene00001776	WBGene00000832		WBGene00016153
WBGene00000275		WBGene00000902	WBGene00002180	WBGene00001777	WBGene00000833		WBGene00016160
WBGene00000276		WBGene00000904	WBGene00002195	WBGene00001780	WBGene00000834		WBGene00016327
WBGene00000277		WBGene00000908	WBGene00002218	WBGene00001786	WBGene00000836		WBGene00016499
WBGene00000279		WBGene00000910	WBGene00002225	WBGene00001811	WBGene00000837		WBGene00016705
WBGene00000280		WBGene00000951	WBGene00002226	WBGene00001812	WBGene00000838		WBGene00016786
WBGene00000281		WBGene00000955	WBGene00002266	WBGene00001813	WBGene00000840		WBGene00016794
WBGene00000282		WBGene00000965	WBGene00002267	WBGene00001817	WBGene00000843		WBGene00016798
WBGene00000283		WBGene00000969	WBGene00002268	WBGene00001818	WBGene00000846		WBGene00016801
WBGene00000289		WBGene00000977	WBGene00002275	WBGene00001836	WBGene00000857		WBGene00016865
WBGene00000292		WBGene00000978	WBGene00002299	WBGene00001837	WBGene00000858		WBGene00016903
WBGene00000293		WBGene00000980	WBGene00002583	WBGene00001875	WBGene00000869		WBGene00016933
WBGene00000294		WBGene00000986	WBGene00002601	WBGene00001884	WBGene00000874		WBGene00016997
WBGene00000295		WBGene00000987	WBGene00002976	WBGene00001900	WBGene00000880		WBGene00017065
WBGene00000296		WBGene00000990	WBGene00002990	WBGene00001902	WBGene00000881		WBGene00017120
WBGene00000298		WBGene00000992	WBGene00002999	WBGene00001911	WBGene00000882		WBGene00017344
WBGene00000301		WBGene00001023	WBGene00003001	WBGene00001924	WBGene00000886		WBGene00017508
WBGene00000366		WBGene00001034	WBGene00003034	WBGene00001952	WBGene00000887		WBGene00017598
WBGene00000367		WBGene00001043	WBGene00003037	WBGene00001953	WBGene00000888		WBGene00017601
WBGene00000368		WBGene00001044	WBGene00003040	WBGene00001955	WBGene00000889		WBGene00017638
WBGene00000369		WBGene00001057	WBGene00003058	WBGene00001959	WBGene00000890		WBGene00017709
WBGene00000371		WBGene00001059	WBGene00003066	WBGene00001995	WBGene00000891		WBGene00017711
WBGene00000372		WBGene00001064	WBGene00003072	WBGene00001997	WBGene00000892		WBGene00017814
WBGene00000373		WBGene00001065	WBGene00003106	WBGene00001998	WBGene00000896		WBGene00017968
WBGene00000375		WBGene00001066	WBGene00003133	WBGene00001999	WBGene00000898		WBGene00018016
WBGene00000376		WBGene00001067	WBGene00003151	WBGene00002000	WBGene00000906		WBGene00018024
WBGene00000377		WBGene00001068	WBGene00003163	WBGene00002002	WBGene00000914		WBGene00018318
WBGene00000378		WBGene00001069	WBGene00003165	WBGene00002004	WBGene00000915		WBGene00018366
WBGene00000379		WBGene00001074	WBGene00003166	WBGene00002011	WBGene00000917		WBGene00018417
WBGene00000380		WBGene00001075	WBGene00003178	WBGene00002029	WBGene00000923		WBGene00018433
WBGene00000381		WBGene00001076	WBGene00003222	WBGene00002040	WBGene00000933		WBGene00018564
WBGene00000382		WBGene00001133	WBGene00003229	WBGene00002046	WBGene00000934		WBGene00018661
WBGene00000383		WBGene00001157	WBGene00003369	WBGene00002047	WBGene00000936		WBGene00018851
WBGene00000386		WBGene00001158	WBGene00003370	WBGene00002048	WBGene00000937		WBGene00018886
WBGene00000387		WBGene00001162	WBGene00003374	WBGene00002053	WBGene00000939		WBGene00018911
WBGene00000388		WBGene00001164	WBGene00003384	WBGene00002054	WBGene00000940		WBGene00018912
WBGene00000389		WBGene00001182	WBGene00003388	WBGene00002064	WBGene00000958		WBGene00018926
WBGene00000390		WBGene00001186	WBGene00003391	WBGene00002065	WBGene00000959		WBGene00019079
WBGene00000391		WBGene00001190	WBGene00003414	WBGene00002066	WBGene00000960		WBGene00019085
WBGene00000392		WBGene00001223	WBGene00003482	WBGene00002069	WBGene00000962		WBGene00019248
WBGene00000393		WBGene00001237	WBGene00003497	WBGene00002079	WBGene00000963		WBGene00019362
WBGene00000395		WBGene00001239	WBGene00003509	WBGene00002149	WBGene00000964		WBGene00019380
WBGene00000396		WBGene00001245	WBGene00003511	WBGene00002175	WBGene00000966		WBGene00019470
WBGene00000397		WBGene00001247	WBGene00003532	WBGene00002179	WBGene00000967		WBGene00019471
WBGene00000399		WBGene00001250	WBGene00003559	WBGene00002192	WBGene00000970		WBGene00019472
WBGene00000401		WBGene00001252	WBGene00003578	WBGene00002198	WBGene00000971		WBGene00019473
WBGene00000402		WBGene00001253	WBGene00003582	WBGene00002207	WBGene00000973		WBGene00019509
WBGene00000403		WBGene00001324	WBGene00003588	WBGene00002216	WBGene00000974		WBGene00019565
WBGene00000405		WBGene00001373	WBGene00003592	WBGene00002224	WBGene00000976		WBGene00019600
WBGene00000406		WBGene00001400	WBGene00003595	WBGene00002227	WBGene00000979		WBGene00019751
WBGene00000407		WBGene00001401	WBGene00003639	WBGene00002228	WBGene00000981		WBGene00019779
WBGene00000408		WBGene00001402	WBGene00003659	WBGene00002239	WBGene00000982		WBGene00019917
WBGene00000409		WBGene00001424	WBGene00003675	WBGene00002244	WBGene00000983		WBGene00020012
WBGene00000410		WBGene00001433	WBGene00003729	WBGene00002252	WBGene00000984		WBGene00020035
WBGene00000411		WBGene00001440	WBGene00003730	WBGene00002259	WBGene00000988		WBGene00020287
WBGene00000412		WBGene00001441	WBGene00003734	WBGene00002260	WBGene00000993		WBGene00020330
WBGene00000413		WBGene00001465	WBGene00003773	WBGene00002264	WBGene00000996		WBGene00020386
WBGene00000414		WBGene00001466	WBGene00003777	WBGene00002276	WBGene00001001		WBGene00020485
WBGene00000415		WBGene00001481	WBGene00003795	WBGene00002295	WBGene00001005		WBGene00020563
WBGene00000416		WBGene00001494	WBGene00003805	WBGene00002297	WBGene00001006		WBGene00020652
WBGene00000417		WBGene00001511	WBGene00003807	WBGene00002344	WBGene00001007		WBGene00020681
WBGene00000419		WBGene00001517	WBGene00003808	WBGene00002696	WBGene00001016		WBGene00020727
WBGene00000420		WBGene00001518	WBGene00003838	WBGene00002717	WBGene00001018		WBGene00020840
WBGene00000421		WBGene00001551	WBGene00003839	WBGene00002804	WBGene00001019		WBGene00020970
WBGene00000422		WBGene00001553	WBGene00003840	WBGene00002850	WBGene00001020		WBGene00021011
WBGene00000423		WBGene00001557	WBGene00003851	WBGene00002957	WBGene00001025		WBGene00021110
WBGene00000424		WBGene00001565	WBGene00003864	WBGene00002979	WBGene00001026		WBGene00021121
WBGene00000426		WBGene00001578	WBGene00003865	WBGene00002982	WBGene00001027		WBGene00021221
WBGene00000428		WBGene00001583	WBGene00003909	WBGene00002986	WBGene00001029		WBGene00021323
WBGene00000429		WBGene00001586	WBGene00003912	WBGene00002987	WBGene00001030		WBGene00021343
WBGene00000430		WBGene00001587	WBGene00003915	WBGene00003000	WBGene00001031		WBGene00021391
WBGene00000431		WBGene00001588	WBGene00003937	WBGene00003014	WBGene00001033		WBGene00021460
WBGene00000432		WBGene00001594	WBGene00003938	WBGene00003017	WBGene00001035		WBGene00021552
WBGene00000433		WBGene00001595	WBGene00003939	WBGene00003018	WBGene00001038		WBGene00021566
WBGene00000435		WBGene00001603	WBGene00003941	WBGene00003024	WBGene00001039		WBGene00021594
WBGene00000436		WBGene00001606	WBGene00003943	WBGene00003033	WBGene00001041		WBGene00021639
WBGene00000437		WBGene00001607	WBGene00003956	WBGene00003043	WBGene00001042		WBGene00021778
WBGene00000438		WBGene00001617	WBGene00003957	WBGene00003060	WBGene00001045		WBGene00021913
WBGene00000439		WBGene00001618	WBGene00003958	WBGene00003062	WBGene00001046		WBGene00022101
WBGene00000440		WBGene00001619	WBGene00003959	WBGene00003068	WBGene00001047		WBGene00022114
WBGene00000441		WBGene00001621	WBGene00003982	WBGene00003078	WBGene00001048		WBGene00022286
WBGene00000442		WBGene00001625	WBGene00003996	WBGene00003084	WBGene00001050		WBGene00022295
WBGene00000443		WBGene00001633	WBGene00004011	WBGene00003085	WBGene00001051		WBGene00022467
WBGene00000445		WBGene00001637	WBGene00004013	WBGene00003089	WBGene00001052		WBGene00022587
WBGene00000446		WBGene00001669	WBGene00004024	WBGene00003102	WBGene00001054		WBGene00022615
WBGene00000447		WBGene00001758	WBGene00004044	WBGene00003107	WBGene00001055		WBGene00022743
WBGene00000448		WBGene00001788	WBGene00004048	WBGene00003130	WBGene00001056		WBGene00022750
WBGene00000449		WBGene00001789	WBGene00004051	WBGene00003132	WBGene00001058		WBGene00044004
WBGene00000450		WBGene00001820	WBGene00004052	WBGene00003134	WBGene00001073		WBGene00044068
WBGene00000451		WBGene00001828	WBGene00004053	WBGene00003142	WBGene00001077		WBGene00044235
WBGene00000452		WBGene00001831	WBGene00004086	WBGene00003149	WBGene00001078		WBGene00044386
WBGene00000453		WBGene00001835	WBGene00004095	WBGene00003155	WBGene00001082		WBGene00044468
WBGene00000454		WBGene00001838	WBGene00004135	WBGene00003158	WBGene00001089		WBGene00045459
WBGene00000457		WBGene00001913	WBGene00004143	WBGene00003168	WBGene00001090		WBGene00077712
WBGene00000458		WBGene00001944	WBGene00004196	WBGene00003171	WBGene00001092
WBGene00000461		WBGene00001954	WBGene00004199	WBGene00003172	WBGene00001093
WBGene00000463		WBGene00001957	WBGene00004214	WBGene00003174	WBGene00001094
WBGene00000464		WBGene00001958	WBGene00004245	WBGene00003177	WBGene00001095
WBGene00000466		WBGene00001960	WBGene00004269	WBGene00003182	WBGene00001101
WBGene00000468		WBGene00001971	WBGene00004303	WBGene00003183	WBGene00001115
WBGene00000469		WBGene00001980	WBGene00004306	WBGene00003196	WBGene00001117
WBGene00000472		WBGene00001985	WBGene00004312	WBGene00003220	WBGene00001118
WBGene00000473		WBGene00001996	WBGene00004350	WBGene00003224	WBGene00001119
WBGene00000474		WBGene00002018	WBGene00004401	WBGene00003225	WBGene00001129
WBGene00000475		WBGene00002019	WBGene00004410	WBGene00003233	WBGene00001130
WBGene00000476		WBGene00002020	WBGene00004442	WBGene00003234	WBGene00001134
WBGene00000477		WBGene00002021	WBGene00004443	WBGene00003235	WBGene00001135
WBGene00000478		WBGene00002024	WBGene00004448	WBGene00003242	WBGene00001137
WBGene00000479		WBGene00002026	WBGene00004737	WBGene00003243	WBGene00001149
WBGene00000480		WBGene00002032	WBGene00004777	WBGene00003247	WBGene00001150
WBGene00000481		WBGene00002033	WBGene00004778	WBGene00003367	WBGene00001151
WBGene00000482		WBGene00002037	WBGene00004786	WBGene00003368	WBGene00001153
WBGene00000483		WBGene00002055	WBGene00004857	WBGene00003373	WBGene00001154
WBGene00000484		WBGene00002056	WBGene00004858	WBGene00003377	WBGene00001155
WBGene00000485		WBGene00002057	WBGene00004898	WBGene00003378	WBGene00001160
WBGene00000490		WBGene00002058	WBGene00004905	WBGene00003387	WBGene00001167
WBGene00000491		WBGene00002059	WBGene00004918	WBGene00003390	WBGene00001172
WBGene00000492		WBGene00002060	WBGene00004923	WBGene00003394	WBGene00001173
WBGene00000493		WBGene00002063	WBGene00004924	WBGene00003396	WBGene00001177
WBGene00000498		WBGene00002067	WBGene00004933	WBGene00003397	WBGene00001179
WBGene00000499		WBGene00002072	WBGene00004949	WBGene00003404	WBGene00001184
WBGene00000500		WBGene00002073	WBGene00004952	WBGene00003406	WBGene00001187
WBGene00000501		WBGene00002151	WBGene00004995	WBGene00003409	WBGene00001188
WBGene00000502		WBGene00002174	WBGene00005006	WBGene00003410	WBGene00001189
WBGene00000503		WBGene00002177	WBGene00005013	WBGene00003412	WBGene00001196
WBGene00000506		WBGene00002186	WBGene00005024	WBGene00003413	WBGene00001202
WBGene00000507		WBGene00002193	WBGene00005153	WBGene00003415	WBGene00001208
WBGene00000508		WBGene00002194	WBGene00006055	WBGene00003418	WBGene00001209
WBGene00000509		WBGene00002199	WBGene00006063	WBGene00003423	WBGene00001224
WBGene00000510		WBGene00002200	WBGene00006331	WBGene00003472	WBGene00001226
WBGene00000511		WBGene00002204	WBGene00006363	WBGene00003476	WBGene00001227
WBGene00000512		WBGene00002205	WBGene00006380	WBGene00003480	WBGene00001228
WBGene00000513		WBGene00002206	WBGene00006384	WBGene00003510	WBGene00001229
WBGene00000514		WBGene00002208	WBGene00006390	WBGene00003516	WBGene00001230
WBGene00000515		WBGene00002210	WBGene00006391	WBGene00003561	WBGene00001231
WBGene00000517		WBGene00002211	WBGene00006392	WBGene00003566	WBGene00001232
WBGene00000518		WBGene00002214	WBGene00006394	WBGene00003570	WBGene00001233
WBGene00000519		WBGene00002234	WBGene00006396	WBGene00003571	WBGene00001234
WBGene00000520		WBGene00002240	WBGene00006431	WBGene00003576	WBGene00001236
WBGene00000521		WBGene00002242	WBGene00006436	WBGene00003581	WBGene00001241
WBGene00000527		WBGene00002250	WBGene00006466	WBGene00003585	WBGene00001248
WBGene00000528		WBGene00002263	WBGene00006475	WBGene00003594	WBGene00001258
WBGene00000529		WBGene00002265	WBGene00006476	WBGene00003597	WBGene00001259
WBGene00000530		WBGene00002269	WBGene00006486	WBGene00003605	WBGene00001262
WBGene00000531		WBGene00002270	WBGene00006487	WBGene00003623	WBGene00001263
WBGene00000532		WBGene00002271	WBGene00006504	WBGene00003657	WBGene00001303
WBGene00000533		WBGene00002272	WBGene00006528	WBGene00003681	WBGene00001328
WBGene00000534		WBGene00002273	WBGene00006529	WBGene00003731	WBGene00001330
WBGene00000535		WBGene00002282	WBGene00006530	WBGene00003736	WBGene00001331
WBGene00000536		WBGene00002783	WBGene00006531	WBGene00003738	WBGene00001333
WBGene00000537		WBGene00002881	WBGene00006534	WBGene00003787	WBGene00001334
WBGene00000539		WBGene00002915	WBGene00006535	WBGene00003789	WBGene00001335
WBGene00000540		WBGene00002974	WBGene00006545	WBGene00003796	WBGene00001336
WBGene00000541		WBGene00002975	WBGene00006546	WBGene00003797	WBGene00001338
WBGene00000542		WBGene00003006	WBGene00006547	WBGene00003800	WBGene00001340
WBGene00000543		WBGene00003008	WBGene00006562	WBGene00003821	WBGene00001352
WBGene00000544		WBGene00003015	WBGene00006565	WBGene00003822	WBGene00001358
WBGene00000545		WBGene00003029	WBGene00006571	WBGene00003826	WBGene00001366
WBGene00000546		WBGene00003035	WBGene00006584	WBGene00003827	WBGene00001368
WBGene00000547		WBGene00003055	WBGene00006585	WBGene00003828	WBGene00001377
WBGene00000548		WBGene00003057	WBGene00006586	WBGene00003830	WBGene00001395
WBGene00000549		WBGene00003075	WBGene00006608	WBGene00003835	WBGene00001396
WBGene00000550		WBGene00003100	WBGene00006616	WBGene00003836	WBGene00001403
WBGene00000552		WBGene00003111	WBGene00006635	WBGene00003841	WBGene00001404
WBGene00000553		WBGene00003124	WBGene00006662	WBGene00003842	WBGene00001405
WBGene00000554		WBGene00003144	WBGene00006671	WBGene00003846	WBGene00001406
WBGene00000561		WBGene00003160	WBGene00006680	WBGene00003847	WBGene00001411
WBGene00000564		WBGene00003169	WBGene00006712	WBGene00003878	WBGene00001414
WBGene00000565		WBGene00003170	WBGene00006718	WBGene00003882	WBGene00001426
WBGene00000566		WBGene00003173	WBGene00006736	WBGene00003889	WBGene00001431
WBGene00000567		WBGene00003209	WBGene00006759	WBGene00003905	WBGene00001443
WBGene00000583		WBGene00003210	WBGene00006764	WBGene00003918	WBGene00001475
WBGene00000584		WBGene00003218	WBGene00006777	WBGene00003920	WBGene00001476
WBGene00000585		WBGene00003238	WBGene00006778	WBGene00003947	WBGene00001477
WBGene00000591		WBGene00003239	WBGene00006792	WBGene00003948	WBGene00001478
WBGene00000594		WBGene00003241	WBGene00006794	WBGene00003953	WBGene00001480
WBGene00000596		WBGene00003258	WBGene00006802	WBGene00003970	WBGene00001485
WBGene00000597		WBGene00003371	WBGene00006804	WBGene00003978	WBGene00001497
WBGene00000599		WBGene00003380	WBGene00006814	WBGene00003986	WBGene00001499
WBGene00000601		WBGene00003385	WBGene00006816	WBGene00004029	WBGene00001502
WBGene00000602		WBGene00003386	WBGene00006820	WBGene00004031	WBGene00001503
WBGene00000603		WBGene00003395	WBGene00006844	WBGene00004046	WBGene00001508
WBGene00000606		WBGene00003402	WBGene00006845	WBGene00004061	WBGene00001509
WBGene00000608		WBGene00003495	WBGene00006852	WBGene00004068	WBGene00001510
WBGene00000611		WBGene00003518	WBGene00006869	WBGene00004076	WBGene00001512
WBGene00000612		WBGene00003523	WBGene00006874	WBGene00004077	WBGene00001515
WBGene00000614		WBGene00003526	WBGene00006875	WBGene00004089	WBGene00001519
WBGene00000615		WBGene00003527	WBGene00006888	WBGene00004091	WBGene00001520
WBGene00000616		WBGene00003533	WBGene00006894	WBGene00004117	WBGene00001522
WBGene00000617		WBGene00003535	WBGene00006896	WBGene00004121	WBGene00001523
WBGene00000618		WBGene00003536	WBGene00006897	WBGene00004130	WBGene00001526
WBGene00000620		WBGene00003537	WBGene00006914	WBGene00004136	WBGene00001527
WBGene00000622		WBGene00003538	WBGene00006915	WBGene00004140	WBGene00001558
WBGene00000625		WBGene00003539	WBGene00006916	WBGene00004147	WBGene00001577
WBGene00000626		WBGene00003540	WBGene00006938	WBGene00004166	WBGene00001579
WBGene00000627		WBGene00003541	WBGene00006940	WBGene00004186	WBGene00001580
WBGene00000631		WBGene00003542	WBGene00006961	WBGene00004191	WBGene00001582
WBGene00000634		WBGene00003543	WBGene00006997	WBGene00004192	WBGene00001585
WBGene00000636		WBGene00003544	WBGene00007012	WBGene00004193	WBGene00001590
WBGene00000637		WBGene00003545	WBGene00007015	WBGene00004195	WBGene00001612
WBGene00000638		WBGene00003546	WBGene00007047	WBGene00004201	WBGene00001613
WBGene00000639		WBGene00003547	WBGene00007062	WBGene00004203	WBGene00001620
WBGene00000640		WBGene00003548	WBGene00007067	WBGene00004209	WBGene00001626
WBGene00000641		WBGene00003549	WBGene00007080	WBGene00004211	WBGene00001627
WBGene00000644		WBGene00003550	WBGene00007089	WBGene00004212	WBGene00001628
WBGene00000645		WBGene00003551	WBGene00007104	WBGene00004217	WBGene00001629
WBGene00000647		WBGene00003552	WBGene00007138	WBGene00004224	WBGene00001632
WBGene00000648		WBGene00003553	WBGene00007140	WBGene00004270	WBGene00001635
WBGene00000649		WBGene00003554	WBGene00007146	WBGene00004271	WBGene00001636
WBGene00000650		WBGene00003562	WBGene00007186	WBGene00004276	WBGene00001638
WBGene00000651		WBGene00003564	WBGene00007190	WBGene00004284	WBGene00001639
WBGene00000653		WBGene00003568	WBGene00007203	WBGene00004296	WBGene00001640
WBGene00000654		WBGene00003590	WBGene00007204	WBGene00004316	WBGene00001641
WBGene00000655		WBGene00003593	WBGene00007223	WBGene00004318	WBGene00001642
WBGene00000656		WBGene00003598	WBGene00007258	WBGene00004335	WBGene00001643
WBGene00000657		WBGene00003599	WBGene00007261	WBGene00004336	WBGene00001644
WBGene00000659		WBGene00003601	WBGene00007268	WBGene00004337	WBGene00001645
WBGene00000660		WBGene00003607	WBGene00007303	WBGene00004340	WBGene00001646
WBGene00000661		WBGene00003613	WBGene00007357	WBGene00004343	WBGene00001648
WBGene00000663		WBGene00003628	WBGene00007398	WBGene00004348	WBGene00001650
WBGene00000664		WBGene00003629	WBGene00007404	WBGene00004359	WBGene00001651
WBGene00000665		WBGene00003709	WBGene00007443	WBGene00004360	WBGene00001660
WBGene00000666		WBGene00003732	WBGene00007476	WBGene00004361	WBGene00001661
WBGene00000667		WBGene00003779	WBGene00007545	WBGene00004364	WBGene00001662
WBGene00000668		WBGene00003793	WBGene00007565	WBGene00004367	WBGene00001674
WBGene00000669		WBGene00003802	WBGene00007584	WBGene00004368	WBGene00001679
WBGene00000670		WBGene00003843	WBGene00007643	WBGene00004372	WBGene00001680
WBGene00000671		WBGene00003845	WBGene00007668	WBGene00004375	WBGene00001683
WBGene00000674		WBGene00003850	WBGene00007680	WBGene00004377	WBGene00001684
WBGene00000675		WBGene00003862	WBGene00007772	WBGene00004382	WBGene00001685
WBGene00000676		WBGene00003863	WBGene00007776	WBGene00004388	WBGene00001686
WBGene00000678		WBGene00003933	WBGene00007808	WBGene00004390	WBGene00001687
WBGene00000679		WBGene00003934	WBGene00007825	WBGene00004393	WBGene00001708
WBGene00000680		WBGene00003962	WBGene00007849	WBGene00004395	WBGene00001709
WBGene00000681		WBGene00003976	WBGene00007859	WBGene00004404	WBGene00001740
WBGene00000682		WBGene00003989	WBGene00007913	WBGene00004409	WBGene00001743
WBGene00000685		WBGene00003991	WBGene00007944	WBGene00004419	WBGene00001744
WBGene00000687		WBGene00003997	WBGene00007995	WBGene00004427	WBGene00001745
WBGene00000690		WBGene00003998	WBGene00008027	WBGene00004432	WBGene00001746
WBGene00000691		WBGene00003999	WBGene00008028	WBGene00004438	WBGene00001747
WBGene00000692		WBGene00004000	WBGene00008029	WBGene00004439	WBGene00001748
WBGene00000693		WBGene00004001	WBGene00008030	WBGene00004450	WBGene00001759
WBGene00000694		WBGene00004002	WBGene00008092	WBGene00004451	WBGene00001790
WBGene00000696		WBGene00004005	WBGene00008123	WBGene00004453	WBGene00001791
WBGene00000697		WBGene00004006	WBGene00008127	WBGene00004459	WBGene00001792
WBGene00000698		WBGene00004007	WBGene00008137	WBGene00004484	WBGene00001793
WBGene00000699		WBGene00004008	WBGene00008166	WBGene00004488	WBGene00001794
WBGene00000700		WBGene00004017	WBGene00008224	WBGene00004498	WBGene00001808
WBGene00000701		WBGene00004020	WBGene00008230	WBGene00004499	WBGene00001814
WBGene00000703		WBGene00004023	WBGene00008275	WBGene00004680	WBGene00001815
WBGene00000704		WBGene00004026	WBGene00008283	WBGene00004682	WBGene00001816
WBGene00000705		WBGene00004030	WBGene00008297	WBGene00004698	WBGene00001819
WBGene00000706		WBGene00004050	WBGene00008314	WBGene00004701	WBGene00001823
WBGene00000707		WBGene00004056	WBGene00008330	WBGene00004703	WBGene00001827
WBGene00000708		WBGene00004062	WBGene00008331	WBGene00004704	WBGene00001834
WBGene00000710		WBGene00004083	WBGene00008375	WBGene00004705	WBGene00001840
WBGene00000711		WBGene00004104	WBGene00008387	WBGene00004706	WBGene00001843
WBGene00000713		WBGene00004182	WBGene00008400	WBGene00004723	WBGene00001844
WBGene00000714		WBGene00004189	WBGene00008404	WBGene00004732	WBGene00001860
WBGene00000715		WBGene00004216	WBGene00008429	WBGene00004735	WBGene00001863
WBGene00000716		WBGene00004218	WBGene00008443	WBGene00004740	WBGene00001872
WBGene00000717		WBGene00004219	WBGene00008459	WBGene00004742	WBGene00001876
WBGene00000718		WBGene00004220	WBGene00008499	WBGene00004749	WBGene00001877
WBGene00000719		WBGene00004221	WBGene00008551	WBGene00004762	WBGene00001878
WBGene00000720		WBGene00004222	WBGene00008592	WBGene00004767	WBGene00001879
WBGene00000721		WBGene00004223	WBGene00008599	WBGene00004771	WBGene00001880
WBGene00000722		WBGene00004225	WBGene00008601	WBGene00004773	WBGene00001881
WBGene00000723		WBGene00004226	WBGene00008604	WBGene00004776	WBGene00001882
WBGene00000724		WBGene00004227	WBGene00008607	WBGene00004779	WBGene00001883
WBGene00000725		WBGene00004228	WBGene00008621	WBGene00004780	WBGene00001885
WBGene00000726		WBGene00004229	WBGene00008625	WBGene00004782	WBGene00001886
WBGene00000727		WBGene00004230	WBGene00008683	WBGene00004793	WBGene00001887
WBGene00000728		WBGene00004231	WBGene00008711	WBGene00004800	WBGene00001888
WBGene00000729		WBGene00004232	WBGene00008746	WBGene00004803	WBGene00001889
WBGene00000730		WBGene00004234	WBGene00008750	WBGene00004829	WBGene00001890
WBGene00000731		WBGene00004235	WBGene00008768	WBGene00004874	WBGene00001891
WBGene00000732		WBGene00004236	WBGene00008890	WBGene00004879	WBGene00001892
WBGene00000733		WBGene00004237	WBGene00008905	WBGene00004881	WBGene00001893
WBGene00000734		WBGene00004239	WBGene00008925	WBGene00004882	WBGene00001894
WBGene00000735		WBGene00004241	WBGene00008990	WBGene00004884	WBGene00001895
WBGene00000737		WBGene00004242	WBGene00008996	WBGene00004886	WBGene00001896
WBGene00000738		WBGene00004243	WBGene00009032	WBGene00004887	WBGene00001899
WBGene00000739		WBGene00004244	WBGene00009058	WBGene00004889	WBGene00001901
WBGene00000740		WBGene00004249	WBGene00009112	WBGene00004891	WBGene00001903
WBGene00000741		WBGene00004264	WBGene00009128	WBGene00004892	WBGene00001904
WBGene00000742		WBGene00004275	WBGene00009146	WBGene00004896	WBGene00001905
WBGene00000743		WBGene00004300	WBGene00009178	WBGene00004915	WBGene00001906
WBGene00000744		WBGene00004309	WBGene00009236	WBGene00004919	WBGene00001907
WBGene00000745		WBGene00004347	WBGene00009256	WBGene00004950	WBGene00001908
WBGene00000746		WBGene00004363	WBGene00009286	WBGene00004975	WBGene00001909
WBGene00000747		WBGene00004374	WBGene00009323	WBGene00004979	WBGene00001912
WBGene00000748		WBGene00004384	WBGene00009370	WBGene00004981	WBGene00001915
WBGene00000749		WBGene00004397	WBGene00009389	WBGene00004985	WBGene00001916
WBGene00000750		WBGene00004398	WBGene00009485	WBGene00005010	WBGene00001917
WBGene00000751		WBGene00004699	WBGene00009492	WBGene00005642	WBGene00001918
WBGene00000752		WBGene00004702	WBGene00009499	WBGene00005644	WBGene00001919
WBGene00000753		WBGene00004748	WBGene00009500	WBGene00005649	WBGene00001920
WBGene00000754		WBGene00004775	WBGene00009505	WBGene00006310	WBGene00001921
WBGene00000755		WBGene00004795	WBGene00009513	WBGene00006318	WBGene00001922
WBGene00000757		WBGene00004798	WBGene00009540	WBGene00006321	WBGene00001923
WBGene00000759		WBGene00004804	WBGene00009556	WBGene00006324	WBGene00001925
WBGene00000761		WBGene00004809	WBGene00009558	WBGene00006359	WBGene00001926
WBGene00000762		WBGene00004810	WBGene00009579	WBGene00006365	WBGene00001927
WBGene00000763		WBGene00004811	WBGene00009584	WBGene00006368	WBGene00001928
WBGene00000764		WBGene00004812	WBGene00009594	WBGene00006369	WBGene00001929
WBGene00000765		WBGene00004813	WBGene00009632	WBGene00006385	WBGene00001930
WBGene00000766		WBGene00004814	WBGene00009636	WBGene00006388	WBGene00001931
WBGene00000767		WBGene00004815	WBGene00009648	WBGene00006389	WBGene00001932
WBGene00000768		WBGene00004816	WBGene00009663	WBGene00006393	WBGene00001933
WBGene00000770		WBGene00004818	WBGene00009691	WBGene00006402	WBGene00001934
WBGene00000771		WBGene00004819	WBGene00009692	WBGene00006406	WBGene00001935
WBGene00000772		WBGene00004820	WBGene00009730	WBGene00006418	WBGene00001936
WBGene00000773		WBGene00004821	WBGene00009739	WBGene00006423	WBGene00001937
WBGene00000774		WBGene00004822	WBGene00009800	WBGene00006424	WBGene00001938
WBGene00000775		WBGene00004823	WBGene00009818	WBGene00006438	WBGene00001939
WBGene00000776		WBGene00004824	WBGene00009824	WBGene00006442	WBGene00001940
WBGene00000777		WBGene00004825	WBGene00009827	WBGene00006444	WBGene00001941
WBGene00000778		WBGene00004826	WBGene00009852	WBGene00006467	WBGene00001942
WBGene00000779		WBGene00004827	WBGene00009876	WBGene00006468	WBGene00001945
WBGene00000780		WBGene00004859	WBGene00009881	WBGene00006483	WBGene00001972
WBGene00000781		WBGene00004862	WBGene00009890	WBGene00006489	WBGene00001973
WBGene00000782		WBGene00004890	WBGene00009891	WBGene00006496	WBGene00001974
WBGene00000783		WBGene00004893	WBGene00009895	WBGene00006505	WBGene00001978
WBGene00000784		WBGene00004894	WBGene00009896	WBGene00006508	WBGene00001979
WBGene00000785		WBGene00004900	WBGene00009899	WBGene00006513	WBGene00001983
WBGene00000786		WBGene00004901	WBGene00009924	WBGene00006514	WBGene00001993
WBGene00000787		WBGene00004902	WBGene00009929	WBGene00006516	WBGene00002001
WBGene00000788		WBGene00004904	WBGene00009932	WBGene00006517	WBGene00002003
WBGene00000789		WBGene00004906	WBGene00009939	WBGene00006519	WBGene00002005
WBGene00000792		WBGene00004908	WBGene00009940	WBGene00006524	WBGene00002007
WBGene00000793		WBGene00004909	WBGene00009958	WBGene00006536	WBGene00002008
WBGene00000794		WBGene00004911	WBGene00009993	WBGene00006537	WBGene00002010
WBGene00000795		WBGene00004922	WBGene00010012	WBGene00006540	WBGene00002025
WBGene00000796		WBGene00004925	WBGene00010063	WBGene00006542	WBGene00002028
WBGene00000797		WBGene00004926	WBGene00010120	WBGene00006543	WBGene00002031
WBGene00000798		WBGene00004958	WBGene00010159	WBGene00006572	WBGene00002035
WBGene00000799		WBGene00004962	WBGene00010182	WBGene00006574	WBGene00002036
WBGene00000800		WBGene00004963	WBGene00010199	WBGene00006577	WBGene00002038
WBGene00000802		WBGene00004972	WBGene00010282	WBGene00006590	WBGene00002039
WBGene00000803		WBGene00004976	WBGene00010306	WBGene00006600	WBGene00002041
WBGene00000812		WBGene00004984	WBGene00010339	WBGene00006607	WBGene00002042
WBGene00000813		WBGene00004993	WBGene00010349	WBGene00006614	WBGene00002043
WBGene00000814		WBGene00004996	WBGene00010364	WBGene00006652	WBGene00002044
WBGene00000815		WBGene00005009	WBGene00010380	WBGene00006654	WBGene00002045
WBGene00000816		WBGene00005016	WBGene00010383	WBGene00006698	WBGene00002050
WBGene00000817		WBGene00005017	WBGene00010403	WBGene00006700	WBGene00002051
WBGene00000818		WBGene00005226	WBGene00010439	WBGene00006704	WBGene00002052
WBGene00000819		WBGene00005895	WBGene00010458	WBGene00006706	WBGene00002061
WBGene00000820		WBGene00006065	WBGene00010465	WBGene00006713	WBGene00002062
WBGene00000821		WBGene00006066	WBGene00010505	WBGene00006714	WBGene00002070
WBGene00000822		WBGene00006067	WBGene00010510	WBGene00006721	WBGene00002071
WBGene00000829		WBGene00006068	WBGene00010554	WBGene00006722	WBGene00002074
WBGene00000830		WBGene00006366	WBGene00010593	WBGene00006723	WBGene00002075
WBGene00000831		WBGene00006371	WBGene00010614	WBGene00006725	WBGene00002076
WBGene00000832		WBGene00006372	WBGene00010639	WBGene00006727	WBGene00002077
WBGene00000833		WBGene00006374	WBGene00010663	WBGene00006735	WBGene00002078
WBGene00000834		WBGene00006395	WBGene00010671	WBGene00006738	WBGene00002080
WBGene00000835		WBGene00006441	WBGene00010677	WBGene00006744	WBGene00002081
WBGene00000836		WBGene00006452	WBGene00010709	WBGene00006750	WBGene00002083
WBGene00000837		WBGene00006454	WBGene00010731	WBGene00006751	WBGene00002146
WBGene00000838		WBGene00006459	WBGene00010755	WBGene00006754	WBGene00002147
WBGene00000839		WBGene00006462	WBGene00010768	WBGene00006756	WBGene00002150
WBGene00000840		WBGene00006484	WBGene00010834	WBGene00006760	WBGene00002152
WBGene00000841		WBGene00006522	WBGene00010857	WBGene00006766	WBGene00002153
WBGene00000843		WBGene00006532	WBGene00010867	WBGene00006770	WBGene00002162
WBGene00000846		WBGene00006533	WBGene00010904	WBGene00006772	WBGene00002169
WBGene00000854		WBGene00006539	WBGene00010922	WBGene00006773	WBGene00002173
WBGene00000857		WBGene00006544	WBGene00010962	WBGene00006774	WBGene00002178
WBGene00000858		WBGene00006549	WBGene00010967	WBGene00006779	WBGene00002181
WBGene00000863		WBGene00006553	WBGene00011017	WBGene00006780	WBGene00002182
WBGene00000865		WBGene00006554	WBGene00011045	WBGene00006786	WBGene00002183
WBGene00000866		WBGene00006556	WBGene00011051	WBGene00006788	WBGene00002184
WBGene00000867		WBGene00006557	WBGene00011052	WBGene00006796	WBGene00002185
WBGene00000868		WBGene00006558	WBGene00011054	WBGene00006797	WBGene00002189
WBGene00000869		WBGene00006559	WBGene00011146	WBGene00006812	WBGene00002190
WBGene00000870		WBGene00006570	WBGene00011181	WBGene00006818	WBGene00002191
WBGene00000871		WBGene00006576	WBGene00011218	WBGene00006832	WBGene00002196
WBGene00000872		WBGene00006580	WBGene00011242	WBGene00006839	WBGene00002201
WBGene00000874		WBGene00006582	WBGene00011258	WBGene00006853	WBGene00002202
WBGene00000875		WBGene00006583	WBGene00011262	WBGene00006873	WBGene00002203
WBGene00000876		WBGene00006587	WBGene00011308	WBGene00006881	WBGene00002213
WBGene00000877		WBGene00006588	WBGene00011311	WBGene00006882	WBGene00002215
WBGene00000878		WBGene00006589	WBGene00011318	WBGene00006893	WBGene00002217
WBGene00000879		WBGene00006591	WBGene00011333	WBGene00006910	WBGene00002219
WBGene00000880		WBGene00006592	WBGene00011340	WBGene00006920	WBGene00002222
WBGene00000881		WBGene00006593	WBGene00011367	WBGene00006923	WBGene00002223
WBGene00000882		WBGene00006604	WBGene00011392	WBGene00006931	WBGene00002229
WBGene00000883		WBGene00006605	WBGene00011401	WBGene00006936	WBGene00002230
WBGene00000884		WBGene00006610	WBGene00011411	WBGene00006941	WBGene00002232
WBGene00000885		WBGene00006621	WBGene00011436	WBGene00006958	WBGene00002233
WBGene00000886		WBGene00006624	WBGene00011437	WBGene00006964	WBGene00002235
WBGene00000887		WBGene00006625	WBGene00011441	WBGene00006970	WBGene00002238
WBGene00000888		WBGene00006637	WBGene00011454	WBGene00006971	WBGene00002243
WBGene00000889		WBGene00006640	WBGene00011462	WBGene00006975	WBGene00002245
WBGene00000890		WBGene00006649	WBGene00011486	WBGene00006976	WBGene00002247
WBGene00000891		WBGene00006657	WBGene00011495	WBGene00006994	WBGene00002248
WBGene00000892		WBGene00006658	WBGene00011501	WBGene00006999	WBGene00002249
WBGene00000894		WBGene00006659	WBGene00011528	WBGene00007013	WBGene00002251
WBGene00000895		WBGene00006663	WBGene00011532	WBGene00007019	WBGene00002257
WBGene00000896		WBGene00006664	WBGene00011556	WBGene00007022	WBGene00002258
WBGene00000897		WBGene00006665	WBGene00011559	WBGene00007027	WBGene00002261
WBGene00000898		WBGene00006666	WBGene00011587	WBGene00007030	WBGene00002262
WBGene00000899		WBGene00006667	WBGene00011589	WBGene00007053	WBGene00002278
WBGene00000900		WBGene00006668	WBGene00011614	WBGene00007060	WBGene00002280
WBGene00000902		WBGene00006670	WBGene00011631	WBGene00007100	WBGene00002324
WBGene00000903		WBGene00006672	WBGene00011644	WBGene00007101	WBGene00002335
WBGene00000904		WBGene00006673	WBGene00011688	WBGene00007105	WBGene00002348
WBGene00000906		WBGene00006674	WBGene00011724	WBGene00007107	WBGene00002363
WBGene00000908		WBGene00006675	WBGene00011739	WBGene00007110	WBGene00002497
WBGene00000910		WBGene00006676	WBGene00011776	WBGene00007118	WBGene00002632
WBGene00000911		WBGene00006677	WBGene00011803	WBGene00007126	WBGene00002637
WBGene00000912		WBGene00006678	WBGene00011806	WBGene00007135	WBGene00002694
WBGene00000913		WBGene00006679	WBGene00011807	WBGene00007167	WBGene00002845
WBGene00000914		WBGene00006681	WBGene00011829	WBGene00007195	WBGene00002855
WBGene00000915		WBGene00006682	WBGene00011830	WBGene00007200	WBGene00002879
WBGene00000917		WBGene00006683	WBGene00011868	WBGene00007215	WBGene00002889
WBGene00000923		WBGene00006684	WBGene00011871	WBGene00007237	WBGene00002891
WBGene00000929		WBGene00006685	WBGene00011878	WBGene00007312	WBGene00002978
WBGene00000931		WBGene00006686	WBGene00011879	WBGene00007333	WBGene00002980
WBGene00000933		WBGene00006687	WBGene00011882	WBGene00007339	WBGene00002981
WBGene00000934		WBGene00006688	WBGene00011906	WBGene00007347	WBGene00002985
WBGene00000935		WBGene00006690	WBGene00011918	WBGene00007363	WBGene00002988
WBGene00000936		WBGene00006691	WBGene00011926	WBGene00007364	WBGene00002989
WBGene00000937		WBGene00006692	WBGene00011929	WBGene00007384	WBGene00002991
WBGene00000938		WBGene00006693	WBGene00011932	WBGene00007386	WBGene00002996
WBGene00000939		WBGene00006694	WBGene00011936	WBGene00007409	WBGene00002998
WBGene00000940		WBGene00006695	WBGene00011941	WBGene00007419	WBGene00003007
WBGene00000941		WBGene00006710	WBGene00011955	WBGene00007433	WBGene00003009
WBGene00000942		WBGene00006717	WBGene00011965	WBGene00007436	WBGene00003020
WBGene00000950		WBGene00006737	WBGene00011966	WBGene00007464	WBGene00003025
WBGene00000951		WBGene00006739	WBGene00011972	WBGene00007488	WBGene00003026
WBGene00000952		WBGene00006741	WBGene00012010	WBGene00007490	WBGene00003030
WBGene00000955		WBGene00006765	WBGene00012016	WBGene00007500	WBGene00003036
WBGene00000958		WBGene00006827	WBGene00012029	WBGene00007513	WBGene00003041
WBGene00000959		WBGene00006861	WBGene00012116	WBGene00007520	WBGene00003047
WBGene00000960		WBGene00006865	WBGene00012131	WBGene00007529	WBGene00003048
WBGene00000961		WBGene00006886	WBGene00012137	WBGene00007591	WBGene00003052
WBGene00000962		WBGene00006895	WBGene00012162	WBGene00007603	WBGene00003059
WBGene00000963		WBGene00006922	WBGene00012168	WBGene00007606	WBGene00003061
WBGene00000964		WBGene00006924	WBGene00012172	WBGene00007616	WBGene00003063
WBGene00000965		WBGene00006935	WBGene00012182	WBGene00007621	WBGene00003064
WBGene00000966		WBGene00006957	WBGene00012198	WBGene00007627	WBGene00003071
WBGene00000967		WBGene00006959	WBGene00012201	WBGene00007628	WBGene00003073
WBGene00000968		WBGene00006978	WBGene00012207	WBGene00007630	WBGene00003074
WBGene00000969		WBGene00006982	WBGene00012222	WBGene00007631	WBGene00003076
WBGene00000970		WBGene00006988	WBGene00012251	WBGene00007645	WBGene00003077
WBGene00000971		WBGene00007006	WBGene00012253	WBGene00007646	WBGene00003079
WBGene00000972		WBGene00007016	WBGene00012259	WBGene00007653	WBGene00003080
WBGene00000973		WBGene00007041	WBGene00012276	WBGene00007664	WBGene00003081
WBGene00000974		WBGene00007044	WBGene00012293	WBGene00007683	WBGene00003082
WBGene00000976		WBGene00007064	WBGene00012352	WBGene00007694	WBGene00003086
WBGene00000977		WBGene00007071	WBGene00012402	WBGene00007697	WBGene00003112
WBGene00000978		WBGene00007072	WBGene00012416	WBGene00007698	WBGene00003119
WBGene00000979		WBGene00007073	WBGene00012445	WBGene00007704	WBGene00003123
WBGene00000980		WBGene00007130	WBGene00012466	WBGene00007705	WBGene00003129
WBGene00000981		WBGene00007154	WBGene00012467	WBGene00007706	WBGene00003136
WBGene00000982		WBGene00007170	WBGene00012468	WBGene00007708	WBGene00003143
WBGene00000983		WBGene00007176	WBGene00012469	WBGene00007711	WBGene00003148
WBGene00000984		WBGene00007228	WBGene00012483	WBGene00007718	WBGene00003150
WBGene00000985		WBGene00007245	WBGene00012496	WBGene00007750	WBGene00003153
WBGene00000986		WBGene00007248	WBGene00012531	WBGene00007756	WBGene00003154
WBGene00000987		WBGene00007252	WBGene00012562	WBGene00007761	WBGene00003156
WBGene00000988		WBGene00007254	WBGene00012693	WBGene00007774	WBGene00003157
WBGene00000989		WBGene00007255	WBGene00012696	WBGene00007786	WBGene00003159
WBGene00000990		WBGene00007270	WBGene00012712	WBGene00007857	WBGene00003161
WBGene00000991		WBGene00007282	WBGene00012718	WBGene00007880	WBGene00003162
WBGene00000992		WBGene00007284	WBGene00012739	WBGene00007912	WBGene00003164
WBGene00000993		WBGene00007328	WBGene00012794	WBGene00007923	WBGene00003175
WBGene00000994		WBGene00007331	WBGene00012807	WBGene00007954	WBGene00003185
WBGene00000996		WBGene00007349	WBGene00012813	WBGene00007955	WBGene00003186
WBGene00001001		WBGene00007369	WBGene00012828	WBGene00007963	WBGene00003214
WBGene00001002		WBGene00007385	WBGene00012829	WBGene00007964	WBGene00003232
WBGene00001005		WBGene00007394	WBGene00012855	WBGene00007965	WBGene00003246
WBGene00001006		WBGene00007396	WBGene00012894	WBGene00007967	WBGene00003253
WBGene00001007		WBGene00007397	WBGene00012908	WBGene00007983	WBGene00003254
WBGene00001008		WBGene00007422	WBGene00012970	WBGene00007984	WBGene00003372
WBGene00001016		WBGene00007448	WBGene00012994	WBGene00008093	WBGene00003375
WBGene00001017		WBGene00007455	WBGene00013000	WBGene00008094	WBGene00003376
WBGene00001018		WBGene00007462	WBGene00013004	WBGene00008122	WBGene00003389
WBGene00001019		WBGene00007493	WBGene00013014	WBGene00008140	WBGene00003392
WBGene00001020		WBGene00007533	WBGene00013028	WBGene00008143	WBGene00003393
WBGene00001022		WBGene00007587	WBGene00013030	WBGene00008183	WBGene00003400
WBGene00001023		WBGene00007592	WBGene00013041	WBGene00008218	WBGene00003401
WBGene00001025		WBGene00007605	WBGene00013043	WBGene00008236	WBGene00003405
WBGene00001026		WBGene00007635	WBGene00013094	WBGene00008238	WBGene00003407
WBGene00001027		WBGene00007650	WBGene00013106	WBGene00008252	WBGene00003408
WBGene00001028		WBGene00007670	WBGene00013109	WBGene00008274	WBGene00003411
WBGene00001029		WBGene00007684	WBGene00013135	WBGene00008316	WBGene00003417
WBGene00001030		WBGene00007691	WBGene00013177	WBGene00008348	WBGene00003421
WBGene00001031		WBGene00007692	WBGene00013187	WBGene00008361	WBGene00003422
WBGene00001032		WBGene00007693	WBGene00013188	WBGene00008362	WBGene00003475
WBGene00001033		WBGene00007695	WBGene00013207	WBGene00008380	WBGene00003477
WBGene00001034		WBGene00007702	WBGene00013239	WBGene00008414	WBGene00003478
WBGene00001035		WBGene00007709	WBGene00013244	WBGene00008418	WBGene00003479
WBGene00001036		WBGene00007710	WBGene00013260	WBGene00008422	WBGene00003485
WBGene00001037		WBGene00007732	WBGene00013290	WBGene00008424	WBGene00003504
WBGene00001038		WBGene00007740	WBGene00013381	WBGene00008426	WBGene00003514
WBGene00001039		WBGene00007760	WBGene00013422	WBGene00008427	WBGene00003515
WBGene00001040		WBGene00007813	WBGene00013440	WBGene00008428	WBGene00003517
WBGene00001041		WBGene00007824	WBGene00013513	WBGene00008441	WBGene00003519
WBGene00001042		WBGene00007862	WBGene00013575	WBGene00008457	WBGene00003555
WBGene00001043		WBGene00007877	WBGene00013585	WBGene00008458	WBGene00003558
WBGene00001044		WBGene00007885	WBGene00013654	WBGene00008504	WBGene00003563
WBGene00001045		WBGene00007914	WBGene00013665	WBGene00008510	WBGene00003567
WBGene00001046		WBGene00007929	WBGene00013674	WBGene00008519	WBGene00003569
WBGene00001047		WBGene00007930	WBGene00013677	WBGene00008521	WBGene00003572
WBGene00001048		WBGene00007938	WBGene00013680	WBGene00008555	WBGene00003573
WBGene00001049		WBGene00007946	WBGene00013703	WBGene00008570	WBGene00003574
WBGene00001050		WBGene00007966	WBGene00013715	WBGene00008585	WBGene00003575
WBGene00001051		WBGene00007988	WBGene00013725	WBGene00008598	WBGene00003579
WBGene00001052		WBGene00007994	WBGene00013792	WBGene00008641	WBGene00003580
WBGene00001053		WBGene00008022	WBGene00013869	WBGene00008643	WBGene00003583
WBGene00001054		WBGene00008034	WBGene00013877	WBGene00008665	WBGene00003584
WBGene00001055		WBGene00008039	WBGene00013892	WBGene00008666	WBGene00003586
WBGene00001056		WBGene00008076	WBGene00013896	WBGene00008667	WBGene00003587
WBGene00001057		WBGene00008086	WBGene00013958	WBGene00008670	WBGene00003589
WBGene00001058		WBGene00008097	WBGene00013970	WBGene00008678	WBGene00003596
WBGene00001059		WBGene00008107	WBGene00014018	WBGene00008682	WBGene00003622
WBGene00001061		WBGene00008129	WBGene00014028	WBGene00008684	WBGene00003654
WBGene00001064		WBGene00008147	WBGene00014052	WBGene00008687	WBGene00003733
WBGene00001065		WBGene00008160	WBGene00014115	WBGene00008688	WBGene00003735
WBGene00001066		WBGene00008185	WBGene00014153	WBGene00008722	WBGene00003772
WBGene00001067		WBGene00008186	WBGene00014170	WBGene00008745	WBGene00003774
WBGene00001068		WBGene00008214	WBGene00014226	WBGene00008764	WBGene00003775
WBGene00001069		WBGene00008222	WBGene00014240	WBGene00008793	WBGene00003776
WBGene00001073		WBGene00008223	WBGene00014241	WBGene00008805	WBGene00003778
WBGene00001074		WBGene00008231	WBGene00014989	WBGene00008808	WBGene00003788
WBGene00001075		WBGene00008247	WBGene00015008	WBGene00008857	WBGene00003794
WBGene00001076		WBGene00008248	WBGene00015025	WBGene00008860	WBGene00003798
WBGene00001077		WBGene00008249	WBGene00015035	WBGene00008878	WBGene00003799
WBGene00001078		WBGene00008250	WBGene00015050	WBGene00008887	WBGene00003803
WBGene00001080		WBGene00008251	WBGene00015057	WBGene00008918	WBGene00003804
WBGene00001081		WBGene00008259	WBGene00015062	WBGene00008921	WBGene00003806
WBGene00001082		WBGene00008260	WBGene00015074	WBGene00008948	WBGene00003815
WBGene00001086		WBGene00008263	WBGene00015091	WBGene00008973	WBGene00003816
WBGene00001087		WBGene00008265	WBGene00015112	WBGene00009004	WBGene00003818
WBGene00001088		WBGene00008266	WBGene00015113	WBGene00009011	WBGene00003825
WBGene00001089		WBGene00008267	WBGene00015130	WBGene00009013	WBGene00003829
WBGene00001090		WBGene00008269	WBGene00015150	WBGene00009078	WBGene00003831
WBGene00001092		WBGene00008270	WBGene00015188	WBGene00009098	WBGene00003834
WBGene00001093		WBGene00008278	WBGene00015247	WBGene00009103	WBGene00003844
WBGene00001094		WBGene00008280	WBGene00015248	WBGene00009118	WBGene00003858
WBGene00001095		WBGene00008284	WBGene00015249	WBGene00009139	WBGene00003870
WBGene00001096		WBGene00008290	WBGene00015303	WBGene00009141	WBGene00003876
WBGene00001101		WBGene00008293	WBGene00015327	WBGene00009174	WBGene00003877
WBGene00001102		WBGene00008294	WBGene00015349	WBGene00009176	WBGene00003883
WBGene00001106		WBGene00008296	WBGene00015389	WBGene00009180	WBGene00003884
WBGene00001115		WBGene00008304	WBGene00015418	WBGene00009189	WBGene00003885
WBGene00001116		WBGene00008346	WBGene00015454	WBGene00009191	WBGene00003886
WBGene00001117		WBGene00008396	WBGene00015462	WBGene00009200	WBGene00003892
WBGene00001118		WBGene00008397	WBGene00015464	WBGene00009201	WBGene00003893
WBGene00001119		WBGene00008407	WBGene00015487	WBGene00009204	WBGene00003898
WBGene00001121		WBGene00008409	WBGene00015499	WBGene00009221	WBGene00003901
WBGene00001122		WBGene00008433	WBGene00015513	WBGene00009226	WBGene00003902
WBGene00001127		WBGene00008444	WBGene00015516	WBGene00009238	WBGene00003903
WBGene00001129		WBGene00008449	WBGene00015564	WBGene00009245	WBGene00003904
WBGene00001130		WBGene00008451	WBGene00015565	WBGene00009258	WBGene00003906
WBGene00001131		WBGene00008453	WBGene00015592	WBGene00009267	WBGene00003907
WBGene00001132		WBGene00008471	WBGene00015650	WBGene00009271	WBGene00003911
WBGene00001133		WBGene00008476	WBGene00015691	WBGene00009289	WBGene00003914
WBGene00001134		WBGene00008477	WBGene00015693	WBGene00009304	WBGene00003916
WBGene00001135		WBGene00008479	WBGene00015704	WBGene00009307	WBGene00003919
WBGene00001137		WBGene00008485	WBGene00015746	WBGene00009316	WBGene00003921
WBGene00001145		WBGene00008486	WBGene00015776	WBGene00009326	WBGene00003922
WBGene00001149		WBGene00008490	WBGene00015777	WBGene00009329	WBGene00003923
WBGene00001150		WBGene00008491	WBGene00015789	WBGene00009337	WBGene00003924
WBGene00001151		WBGene00008512	WBGene00015794	WBGene00009341	WBGene00003925
WBGene00001153		WBGene00008516	WBGene00015807	WBGene00009353	WBGene00003926
WBGene00001154		WBGene00008542	WBGene00015815	WBGene00009367	WBGene00003927
WBGene00001155		WBGene00008549	WBGene00015889	WBGene00009403	WBGene00003928
WBGene00001156		WBGene00008552	WBGene00015914	WBGene00009435	WBGene00003929
WBGene00001157		WBGene00008560	WBGene00015939	WBGene00009443	WBGene00003930
WBGene00001158		WBGene00008581	WBGene00015994	WBGene00009455	WBGene00003931
WBGene00001160		WBGene00008591	WBGene00016002	WBGene00009460	WBGene00003932
WBGene00001161		WBGene00008593	WBGene00016029	WBGene00009475	WBGene00003949
WBGene00001162		WBGene00008594	WBGene00016057	WBGene00009477	WBGene00003950
WBGene00001163		WBGene00008595	WBGene00016059	WBGene00009479	WBGene00003951
WBGene00001164		WBGene00008596	WBGene00016060	WBGene00009484	WBGene00003952
WBGene00001166		WBGene00008597	WBGene00016062	WBGene00009507	WBGene00003954
WBGene00001167		WBGene00008609	WBGene00016093	WBGene00009514	WBGene00003955
WBGene00001168		WBGene00008610	WBGene00016094	WBGene00009532	WBGene00003961
WBGene00001169		WBGene00008652	WBGene00016095	WBGene00009553	WBGene00003963
WBGene00001171		WBGene00008661	WBGene00016101	WBGene00009565	WBGene00003964
WBGene00001172		WBGene00008663	WBGene00016110	WBGene00009586	WBGene00003965
WBGene00001173		WBGene00008669	WBGene00016116	WBGene00009627	WBGene00003966
WBGene00001177		WBGene00008681	WBGene00016118	WBGene00009650	WBGene00003967
WBGene00001178		WBGene00008690	WBGene00016162	WBGene00009665	WBGene00003969
WBGene00001179		WBGene00008692	WBGene00016173	WBGene00009686	WBGene00003975
WBGene00001182		WBGene00008730	WBGene00016269	WBGene00009706	WBGene00003980
WBGene00001184		WBGene00008732	WBGene00016335	WBGene00009717	WBGene00003995
WBGene00001186		WBGene00008748	WBGene00016340	WBGene00009731	WBGene00004003
WBGene00001187		WBGene00008749	WBGene00016343	WBGene00009735	WBGene00004014
WBGene00001188		WBGene00008776	WBGene00016350	WBGene00009738	WBGene00004015
WBGene00001189		WBGene00008779	WBGene00016354	WBGene00009745	WBGene00004016
WBGene00001190		WBGene00008785	WBGene00016393	WBGene00009773	WBGene00004025
WBGene00001194		WBGene00008799	WBGene00016421	WBGene00009801	WBGene00004028
WBGene00001196		WBGene00008801	WBGene00016435	WBGene00009811	WBGene00004032
WBGene00001202		WBGene00008802	WBGene00016540	WBGene00009865	WBGene00004033
WBGene00001204		WBGene00008804	WBGene00016545	WBGene00009882	WBGene00004034
WBGene00001207		WBGene00008821	WBGene00016546	WBGene00009885	WBGene00004035
WBGene00001208		WBGene00008861	WBGene00016547	WBGene00009892	WBGene00004036
WBGene00001209		WBGene00008897	WBGene00016549	WBGene00009908	WBGene00004038
WBGene00001210		WBGene00008911	WBGene00016550	WBGene00009922	WBGene00004039
WBGene00001215		WBGene00008929	WBGene00016600	WBGene00009930	WBGene00004040
WBGene00001223		WBGene00008934	WBGene00016601	WBGene00009973	WBGene00004042
WBGene00001224		WBGene00008936	WBGene00016602	WBGene00009996	WBGene00004043
WBGene00001225		WBGene00008952	WBGene00016603	WBGene00009998	WBGene00004045
WBGene00001226		WBGene00008957	WBGene00016614	WBGene00010002	WBGene00004047
WBGene00001227		WBGene00008969	WBGene00016631	WBGene00010013	WBGene00004049
WBGene00001228		WBGene00008976	WBGene00016664	WBGene00010028	WBGene00004055
WBGene00001229		WBGene00008977	WBGene00016725	WBGene00010056	WBGene00004058
WBGene00001230		WBGene00008980	WBGene00016790	WBGene00010077	WBGene00004059
WBGene00001231		WBGene00008987	WBGene00016793	WBGene00010096	WBGene00004060
WBGene00001232		WBGene00008992	WBGene00016842	WBGene00010115	WBGene00004063
WBGene00001233		WBGene00008997	WBGene00016846	WBGene00010117	WBGene00004064
WBGene00001234		WBGene00008998	WBGene00016868	WBGene00010138	WBGene00004075
WBGene00001235		WBGene00009001	WBGene00016888	WBGene00010139	WBGene00004085
WBGene00001236		WBGene00009039	WBGene00016911	WBGene00010204	WBGene00004087
WBGene00001237		WBGene00009059	WBGene00016937	WBGene00010230	WBGene00004088
WBGene00001239		WBGene00009073	WBGene00016973	WBGene00010231	WBGene00004090
WBGene00001241		WBGene00009089	WBGene00016977	WBGene00010304	WBGene00004092
WBGene00001242		WBGene00009106	WBGene00016987	WBGene00010337	WBGene00004101
WBGene00001245		WBGene00009110	WBGene00017039	WBGene00010354	WBGene00004109
WBGene00001247		WBGene00009113	WBGene00017054	WBGene00010356	WBGene00004131
WBGene00001248		WBGene00009127	WBGene00017123	WBGene00010374	WBGene00004134
WBGene00001249		WBGene00009129	WBGene00017159	WBGene00010418	WBGene00004151
WBGene00001250		WBGene00009132	WBGene00017164	WBGene00010419	WBGene00004178
WBGene00001252		WBGene00009142	WBGene00017183	WBGene00010420	WBGene00004179
WBGene00001253		WBGene00009148	WBGene00017210	WBGene00010425	WBGene00004180
WBGene00001258		WBGene00009153	WBGene00017240	WBGene00010427	WBGene00004181
WBGene00001259		WBGene00009156	WBGene00017269	WBGene00010476	WBGene00004183
WBGene00001262		WBGene00009160	WBGene00017289	WBGene00010479	WBGene00004184
WBGene00001263		WBGene00009162	WBGene00017320	WBGene00010500	WBGene00004185
WBGene00001281		WBGene00009165	WBGene00017326	WBGene00010502	WBGene00004187
WBGene00001303		WBGene00009192	WBGene00017328	WBGene00010551	WBGene00004188
WBGene00001320		WBGene00009219	WBGene00017357	WBGene00010557	WBGene00004190
WBGene00001324		WBGene00009241	WBGene00017389	WBGene00010560	WBGene00004194
WBGene00001328		WBGene00009255	WBGene00017419	WBGene00010579	WBGene00004197
WBGene00001329		WBGene00009257	WBGene00017464	WBGene00010606	WBGene00004198
WBGene00001330		WBGene00009263	WBGene00017482	WBGene00010609	WBGene00004204
WBGene00001331		WBGene00009272	WBGene00017487	WBGene00010610	WBGene00004205
WBGene00001332		WBGene00009278	WBGene00017515	WBGene00010620	WBGene00004206
WBGene00001333		WBGene00009306	WBGene00017532	WBGene00010640	WBGene00004207
WBGene00001334		WBGene00009314	WBGene00017565	WBGene00010641	WBGene00004208
WBGene00001335		WBGene00009315	WBGene00017642	WBGene00010642	WBGene00004210
WBGene00001336		WBGene00009325	WBGene00017705	WBGene00010675	WBGene00004213
WBGene00001337		WBGene00009340	WBGene00017707	WBGene00010676	WBGene00004215
WBGene00001338		WBGene00009343	WBGene00017723	WBGene00010701	WBGene00004233
WBGene00001340		WBGene00009347	WBGene00017735	WBGene00010702	WBGene00004248
WBGene00001352		WBGene00009364	WBGene00017738	WBGene00010703	WBGene00004254
WBGene00001358		WBGene00009378	WBGene00017742	WBGene00010704	WBGene00004255
WBGene00001365		WBGene00009384	WBGene00017757	WBGene00010716	WBGene00004256
WBGene00001366		WBGene00009386	WBGene00017760	WBGene00010722	WBGene00004257
WBGene00001368		WBGene00009444	WBGene00017852	WBGene00010732	WBGene00004258
WBGene00001371		WBGene00009445	WBGene00017860	WBGene00010736	WBGene00004259
WBGene00001372		WBGene00009447	WBGene00017861	WBGene00010759	WBGene00004266
WBGene00001373		WBGene00009448	WBGene00017886	WBGene00010762	WBGene00004267
WBGene00001374		WBGene00009456	WBGene00017909	WBGene00010767	WBGene00004268
WBGene00001377		WBGene00009508	WBGene00017920	WBGene00010771	WBGene00004272
WBGene00001395		WBGene00009548	WBGene00017931	WBGene00010780	WBGene00004273
WBGene00001396		WBGene00009576	WBGene00017936	WBGene00010845	WBGene00004274
WBGene00001397		WBGene00009595	WBGene00017945	WBGene00010856	WBGene00004277
WBGene00001398		WBGene00009604	WBGene00017950	WBGene00010858	WBGene00004278
WBGene00001399		WBGene00009661	WBGene00017954	WBGene00010890	WBGene00004279
WBGene00001400		WBGene00009673	WBGene00017988	WBGene00010891	WBGene00004281
WBGene00001401		WBGene00009678	WBGene00018006	WBGene00010898	WBGene00004282
WBGene00001402		WBGene00009695	WBGene00018017	WBGene00010908	WBGene00004283
WBGene00001403		WBGene00009729	WBGene00018023	WBGene00010909	WBGene00004285
WBGene00001404		WBGene00009740	WBGene00018061	WBGene00010915	WBGene00004286
WBGene00001405		WBGene00009753	WBGene00018067	WBGene00010923	WBGene00004287
WBGene00001406		WBGene00009790	WBGene00018074	WBGene00010925	WBGene00004297
WBGene00001410		WBGene00009799	WBGene00018138	WBGene00010959	WBGene00004298
WBGene00001411		WBGene00009854	WBGene00018160	WBGene00010963	WBGene00004302
WBGene00001412		WBGene00009855	WBGene00018206	WBGene00010964	WBGene00004304
WBGene00001414		WBGene00009856	WBGene00018214	WBGene00010965	WBGene00004305
WBGene00001423		WBGene00009857	WBGene00018239	WBGene00010975	WBGene00004307
WBGene00001424		WBGene00009859	WBGene00018354	WBGene00010990	WBGene00004308
WBGene00001425		WBGene00009860	WBGene00018405	WBGene00011009	WBGene00004310
WBGene00001426		WBGene00009880	WBGene00018475	WBGene00011033	WBGene00004311
WBGene00001427		WBGene00009888	WBGene00018513	WBGene00011035	WBGene00004313
WBGene00001428		WBGene00009921	WBGene00018516	WBGene00011040	WBGene00004314
WBGene00001429		WBGene00009954	WBGene00018527	WBGene00011043	WBGene00004315
WBGene00001430		WBGene00009956	WBGene00018531	WBGene00011058	WBGene00004317
WBGene00001431		WBGene00009960	WBGene00018547	WBGene00011064	WBGene00004319
WBGene00001432		WBGene00009962	WBGene00018566	WBGene00011067	WBGene00004320
WBGene00001433		WBGene00009977	WBGene00018567	WBGene00011068	WBGene00004321
WBGene00001434		WBGene00009980	WBGene00018568	WBGene00011094	WBGene00004322
WBGene00001438		WBGene00009999	WBGene00018609	WBGene00011109	WBGene00004338
WBGene00001439		WBGene00010010	WBGene00018696	WBGene00011123	WBGene00004339
WBGene00001440		WBGene00010011	WBGene00018698	WBGene00011144	WBGene00004341
WBGene00001441		WBGene00010036	WBGene00018706	WBGene00011194	WBGene00004344
WBGene00001443		WBGene00010037	WBGene00018716	WBGene00011235	WBGene00004345
WBGene00001465		WBGene00010047	WBGene00018738	WBGene00011240	WBGene00004355
WBGene00001466		WBGene00010067	WBGene00018757	WBGene00011247	WBGene00004356
WBGene00001470		WBGene00010070	WBGene00018762	WBGene00011268	WBGene00004357
WBGene00001475		WBGene00010082	WBGene00018819	WBGene00011283	WBGene00004358
WBGene00001476		WBGene00010093	WBGene00018831	WBGene00011298	WBGene00004371
WBGene00001477		WBGene00010109	WBGene00018885	WBGene00011315	WBGene00004373
WBGene00001478		WBGene00010134	WBGene00018897	WBGene00011327	WBGene00004378
WBGene00001479		WBGene00010162	WBGene00018900	WBGene00011334	WBGene00004381
WBGene00001480		WBGene00010167	WBGene00018963	WBGene00011338	WBGene00004383
WBGene00001481		WBGene00010169	WBGene00018990	WBGene00011348	WBGene00004385
WBGene00001483		WBGene00010192	WBGene00018998	WBGene00011353	WBGene00004386
WBGene00001484		WBGene00010228	WBGene00019030	WBGene00011408	WBGene00004387
WBGene00001485		WBGene00010264	WBGene00019087	WBGene00011416	WBGene00004389
WBGene00001486		WBGene00010270	WBGene00019096	WBGene00011419	WBGene00004391
WBGene00001487		WBGene00010275	WBGene00019102	WBGene00011433	WBGene00004392
WBGene00001488		WBGene00010280	WBGene00019128	WBGene00011467	WBGene00004400
WBGene00001489		WBGene00010302	WBGene00019178	WBGene00011481	WBGene00004402
WBGene00001490		WBGene00010307	WBGene00019179	WBGene00011507	WBGene00004403
WBGene00001491		WBGene00010309	WBGene00019257	WBGene00011511	WBGene00004405
WBGene00001492		WBGene00010323	WBGene00019264	WBGene00011527	WBGene00004408
WBGene00001493		WBGene00010329	WBGene00019277	WBGene00011554	WBGene00004411
WBGene00001494		WBGene00010345	WBGene00019284	WBGene00011563	WBGene00004412
WBGene00001496		WBGene00010399	WBGene00019289	WBGene00011573	WBGene00004413
WBGene00001497		WBGene00010411	WBGene00019347	WBGene00011576	WBGene00004414
WBGene00001498		WBGene00010416	WBGene00019394	WBGene00011580	WBGene00004415
WBGene00001499		WBGene00010417	WBGene00019424	WBGene00011593	WBGene00004416
WBGene00001500		WBGene00010421	WBGene00019438	WBGene00011596	WBGene00004417
WBGene00001501		WBGene00010434	WBGene00019478	WBGene00011604	WBGene00004418
WBGene00001502		WBGene00010456	WBGene00019535	WBGene00011615	WBGene00004420
WBGene00001503		WBGene00010470	WBGene00019584	WBGene00011630	WBGene00004421
WBGene00001505		WBGene00010471	WBGene00019606	WBGene00011645	WBGene00004422
WBGene00001507		WBGene00010472	WBGene00019612	WBGene00011673	WBGene00004423
WBGene00001508		WBGene00010473	WBGene00019616	WBGene00011676	WBGene00004424
WBGene00001509		WBGene00010498	WBGene00019617	WBGene00011679	WBGene00004425
WBGene00001510		WBGene00010545	WBGene00019667	WBGene00011696	WBGene00004426
WBGene00001511		WBGene00010558	WBGene00019692	WBGene00011729	WBGene00004428
WBGene00001512		WBGene00010562	WBGene00019717	WBGene00011732	WBGene00004429
WBGene00001513		WBGene00010569	WBGene00019730	WBGene00011740	WBGene00004430
WBGene00001515		WBGene00010572	WBGene00019773	WBGene00011743	WBGene00004431
WBGene00001516		WBGene00010583	WBGene00019782	WBGene00011759	WBGene00004433
WBGene00001517		WBGene00010616	WBGene00019786	WBGene00011824	WBGene00004434
WBGene00001518		WBGene00010619	WBGene00019800	WBGene00011828	WBGene00004435
WBGene00001519		WBGene00010621	WBGene00019808	WBGene00011834	WBGene00004436
WBGene00001520		WBGene00010636	WBGene00019817	WBGene00011887	WBGene00004437
WBGene00001522		WBGene00010637	WBGene00019831	WBGene00011897	WBGene00004440
WBGene00001523		WBGene00010638	WBGene00019883	WBGene00011908	WBGene00004441
WBGene00001526		WBGene00010654	WBGene00019935	WBGene00011964	WBGene00004444
WBGene00001527		WBGene00010661	WBGene00019937	WBGene00011969	WBGene00004445
WBGene00001538		WBGene00010666	WBGene00019940	WBGene00011970	WBGene00004446
WBGene00001551		WBGene00010678	WBGene00019980	WBGene00011980	WBGene00004447
WBGene00001552		WBGene00010681	WBGene00019986	WBGene00012002	WBGene00004449
WBGene00001553		WBGene00010684	WBGene00020003	WBGene00012073	WBGene00004452
WBGene00001554		WBGene00010694	WBGene00020018	WBGene00012094	WBGene00004454
WBGene00001555		WBGene00010698	WBGene00020031	WBGene00012100	WBGene00004456
WBGene00001556		WBGene00010700	WBGene00020036	WBGene00012124	WBGene00004457
WBGene00001557		WBGene00010712	WBGene00020037	WBGene00012132	WBGene00004458
WBGene00001558		WBGene00010730	WBGene00020070	WBGene00012158	WBGene00004460
WBGene00001559		WBGene00010738	WBGene00020094	WBGene00012164	WBGene00004461
WBGene00001560		WBGene00010741	WBGene00020097	WBGene00012170	WBGene00004462
WBGene00001565		WBGene00010763	WBGene00020113	WBGene00012177	WBGene00004463
WBGene00001568		WBGene00010783	WBGene00020130	WBGene00012179	WBGene00004464
WBGene00001574		WBGene00010784	WBGene00020163	WBGene00012184	WBGene00004465
WBGene00001577		WBGene00010800	WBGene00020166	WBGene00012194	WBGene00004466
WBGene00001578		WBGene00010802	WBGene00020179	WBGene00012209	WBGene00004467
WBGene00001579		WBGene00010812	WBGene00020181	WBGene00012234	WBGene00004468
WBGene00001580		WBGene00010902	WBGene00020208	WBGene00012244	WBGene00004469
WBGene00001582		WBGene00010905	WBGene00020246	WBGene00012245	WBGene00004470
WBGene00001583		WBGene00010919	WBGene00020256	WBGene00012280	WBGene00004471
WBGene00001585		WBGene00010936	WBGene00020258	WBGene00012295	WBGene00004472
WBGene00001586		WBGene00010960	WBGene00020273	WBGene00012315	WBGene00004473
WBGene00001587		WBGene00010985	WBGene00020284	WBGene00012322	WBGene00004474
WBGene00001588		WBGene00010993	WBGene00020289	WBGene00012342	WBGene00004475
WBGene00001590		WBGene00010999	WBGene00020299	WBGene00012343	WBGene00004476
WBGene00001591		WBGene00011000	WBGene00020307	WBGene00012354	WBGene00004477
WBGene00001592		WBGene00011016	WBGene00020322	WBGene00012356	WBGene00004478
WBGene00001593		WBGene00011039	WBGene00020368	WBGene00012359	WBGene00004479
WBGene00001594		WBGene00011053	WBGene00020369	WBGene00012366	WBGene00004480
WBGene00001595		WBGene00011055	WBGene00020389	WBGene00012371	WBGene00004481
WBGene00001596		WBGene00011069	WBGene00020427	WBGene00012376	WBGene00004482
WBGene00001602		WBGene00011076	WBGene00020444	WBGene00012389	WBGene00004483
WBGene00001603		WBGene00011088	WBGene00020471	WBGene00012394	WBGene00004485
WBGene00001604		WBGene00011090	WBGene00020486	WBGene00012423	WBGene00004486
WBGene00001606		WBGene00011092	WBGene00020498	WBGene00012464	WBGene00004487
WBGene00001607		WBGene00011093	WBGene00020506	WBGene00012465	WBGene00004489
WBGene00001609		WBGene00011102	WBGene00020530	WBGene00012484	WBGene00004490
WBGene00001612		WBGene00011105	WBGene00020604	WBGene00012558	WBGene00004491
WBGene00001613		WBGene00011112	WBGene00020625	WBGene00012631	WBGene00004492
WBGene00001614		WBGene00011130	WBGene00020646	WBGene00012639	WBGene00004493
WBGene00001615		WBGene00011143	WBGene00020659	WBGene00012643	WBGene00004494
WBGene00001616		WBGene00011155	WBGene00020682	WBGene00012650	WBGene00004495
WBGene00001617		WBGene00011156	WBGene00020689	WBGene00012659	WBGene00004496
WBGene00001618		WBGene00011168	WBGene00020694	WBGene00012722	WBGene00004497
WBGene00001619		WBGene00011169	WBGene00020784	WBGene00012730	WBGene00004501
WBGene00001620		WBGene00011173	WBGene00020823	WBGene00012735	WBGene00004502
WBGene00001621		WBGene00011175	WBGene00020838	WBGene00012756	WBGene00004503
WBGene00001622		WBGene00011193	WBGene00020901	WBGene00012765	WBGene00004504
WBGene00001623		WBGene00011205	WBGene00020903	WBGene00012769	WBGene00004505
WBGene00001624		WBGene00011230	WBGene00020914	WBGene00012780	WBGene00004506
WBGene00001625		WBGene00011248	WBGene00020931	WBGene00012804	WBGene00004507
WBGene00001626		WBGene00011249	WBGene00020936	WBGene00012811	WBGene00004679
WBGene00001627		WBGene00011259	WBGene00021093	WBGene00012830	WBGene00004700
WBGene00001628		WBGene00011270	WBGene00021131	WBGene00012858	WBGene00004719
WBGene00001629		WBGene00011273	WBGene00021132	WBGene00012887	WBGene00004727
WBGene00001630		WBGene00011276	WBGene00021152	WBGene00012891	WBGene00004728
WBGene00001632		WBGene00011279	WBGene00021208	WBGene00012904	WBGene00004729
WBGene00001633		WBGene00011299	WBGene00021209	WBGene00012907	WBGene00004736
WBGene00001635		WBGene00011326	WBGene00021214	WBGene00012914	WBGene00004738
WBGene00001636		WBGene00011330	WBGene00021249	WBGene00012925	WBGene00004743
WBGene00001637		WBGene00011339	WBGene00021304	WBGene00012927	WBGene00004744
WBGene00001638		WBGene00011345	WBGene00021316	WBGene00012928	WBGene00004752
WBGene00001639		WBGene00011354	WBGene00021320	WBGene00012933	WBGene00004753
WBGene00001640		WBGene00011355	WBGene00021348	WBGene00012935	WBGene00004754
WBGene00001641		WBGene00011356	WBGene00021363	WBGene00012950	WBGene00004755
WBGene00001642		WBGene00011358	WBGene00021367	WBGene00012980	WBGene00004756
WBGene00001643		WBGene00011359	WBGene00021376	WBGene00012984	WBGene00004758
WBGene00001644		WBGene00011360	WBGene00021412	WBGene00012987	WBGene00004759
WBGene00001645		WBGene00011361	WBGene00021421	WBGene00012990	WBGene00004760
WBGene00001646		WBGene00011362	WBGene00021423	WBGene00012997	WBGene00004766
WBGene00001647		WBGene00011364	WBGene00021457	WBGene00013002	WBGene00004768
WBGene00001648		WBGene00011423	WBGene00021502	WBGene00013038	WBGene00004769
WBGene00001650		WBGene00011439	WBGene00021503	WBGene00013082	WBGene00004774
WBGene00001651		WBGene00011456	WBGene00021537	WBGene00013093	WBGene00004781
WBGene00001660		WBGene00011503	WBGene00021561	WBGene00013095	WBGene00004787
WBGene00001661		WBGene00011522	WBGene00021597	WBGene00013131	WBGene00004788
WBGene00001662		WBGene00011523	WBGene00021629	WBGene00013132	WBGene00004789
WBGene00001666		WBGene00011558	WBGene00021638	WBGene00013136	WBGene00004790
WBGene00001669		WBGene00011584	WBGene00021647	WBGene00013150	WBGene00004801
WBGene00001674		WBGene00011595	WBGene00021683	WBGene00013160	WBGene00004802
WBGene00001678		WBGene00011606	WBGene00021689	WBGene00013202	WBGene00004806
WBGene00001679		WBGene00011611	WBGene00021709	WBGene00013209	WBGene00004807
WBGene00001680		WBGene00011613	WBGene00021715	WBGene00013217	WBGene00004808
WBGene00001681		WBGene00011621	WBGene00021780	WBGene00013223	WBGene00004830
WBGene00001682		WBGene00011635	WBGene00021785	WBGene00013224	WBGene00004831
WBGene00001683		WBGene00011650	WBGene00021798	WBGene00013255	WBGene00004854
WBGene00001684		WBGene00011655	WBGene00021812	WBGene00013258	WBGene00004855
WBGene00001685		WBGene00011658	WBGene00021813	WBGene00013268	WBGene00004856
WBGene00001686		WBGene00011730	WBGene00021815	WBGene00013269	WBGene00004860
WBGene00001687		WBGene00011755	WBGene00021846	WBGene00013301	WBGene00004873
WBGene00001707		WBGene00011756	WBGene00021852	WBGene00013312	WBGene00004875
WBGene00001708		WBGene00011779	WBGene00021856	WBGene00013339	WBGene00004876
WBGene00001709		WBGene00011781	WBGene00021900	WBGene00013344	WBGene00004877
WBGene00001740		WBGene00011794	WBGene00021901	WBGene00013347	WBGene00004878
WBGene00001743		WBGene00011835	WBGene00021929	WBGene00013373	WBGene00004880
WBGene00001744		WBGene00011837	WBGene00021931	WBGene00013376	WBGene00004888
WBGene00001745		WBGene00011852	WBGene00021933	WBGene00013378	WBGene00004895
WBGene00001746		WBGene00011853	WBGene00021945	WBGene00013406	WBGene00004897
WBGene00001747		WBGene00011859	WBGene00021984	WBGene00013407	WBGene00004910
WBGene00001748		WBGene00011866	WBGene00021994	WBGene00013433	WBGene00004912
WBGene00001749		WBGene00011880	WBGene00022025	WBGene00013447	WBGene00004913
WBGene00001750		WBGene00011883	WBGene00022040	WBGene00013455	WBGene00004914
WBGene00001751		WBGene00011939	WBGene00022043	WBGene00013497	WBGene00004916
WBGene00001752		WBGene00011953	WBGene00022053	WBGene00013529	WBGene00004917
WBGene00001753		WBGene00011971	WBGene00022057	WBGene00013538	WBGene00004920
WBGene00001754		WBGene00011992	WBGene00022077	WBGene00013541	WBGene00004921
WBGene00001755		WBGene00011994	WBGene00022128	WBGene00013544	WBGene00004927
WBGene00001756		WBGene00012011	WBGene00022138	WBGene00013578	WBGene00004929
WBGene00001757		WBGene00012013	WBGene00022175	WBGene00013587	WBGene00004930
WBGene00001758		WBGene00012022	WBGene00022180	WBGene00013643	WBGene00004931
WBGene00001759		WBGene00012023	WBGene00022181	WBGene00013666	WBGene00004932
WBGene00001760		WBGene00012024	WBGene00022192	WBGene00013669	WBGene00004947
WBGene00001761		WBGene00012025	WBGene00022256	WBGene00013671	WBGene00004951
WBGene00001762		WBGene00012040	WBGene00022278	WBGene00013683	WBGene00004959
WBGene00001763		WBGene00012054	WBGene00022296	WBGene00013711	WBGene00004969
WBGene00001764		WBGene00012055	WBGene00022313	WBGene00013720	WBGene00004978
WBGene00001765		WBGene00012075	WBGene00022348	WBGene00013730	WBGene00004980
WBGene00001766		WBGene00012084	WBGene00022361	WBGene00013732	WBGene00005007
WBGene00001767		WBGene00012099	WBGene00022365	WBGene00013738	WBGene00005014
WBGene00001768		WBGene00012102	WBGene00022367	WBGene00013739	WBGene00005015
WBGene00001769		WBGene00012103	WBGene00022434	WBGene00013748	WBGene00005019
WBGene00001770		WBGene00012114	WBGene00022435	WBGene00013808	WBGene00005020
WBGene00001771		WBGene00012115	WBGene00022454	WBGene00013835	WBGene00005021
WBGene00001772		WBGene00012135	WBGene00022499	WBGene00013857	WBGene00005022
WBGene00001773		WBGene00012138	WBGene00022500	WBGene00013894	WBGene00005023
WBGene00001774		WBGene00012143	WBGene00022512	WBGene00013914	WBGene00005025
WBGene00001775		WBGene00012150	WBGene00022531	WBGene00013917	WBGene00005026
WBGene00001776		WBGene00012166	WBGene00022532	WBGene00013921	WBGene00005077
WBGene00001777		WBGene00012186	WBGene00022567	WBGene00013926	WBGene00005078
WBGene00001778		WBGene00012196	WBGene00022570	WBGene00013971	WBGene00005643
WBGene00001779		WBGene00012206	WBGene00022572	WBGene00013972	WBGene00005647
WBGene00001780		WBGene00012224	WBGene00022573	WBGene00013983	WBGene00005648
WBGene00001781		WBGene00012233	WBGene00022574	WBGene00013984	WBGene00005662
WBGene00001782		WBGene00012236	WBGene00022631	WBGene00013985	WBGene00005663
WBGene00001783		WBGene00012270	WBGene00022635	WBGene00013994	WBGene00006059
WBGene00001784		WBGene00012271	WBGene00022663	WBGene00013996	WBGene00006061
WBGene00001785		WBGene00012275	WBGene00022664	WBGene00013997	WBGene00006062
WBGene00001786		WBGene00012285	WBGene00022727	WBGene00014001	WBGene00006064
WBGene00001787		WBGene00012302	WBGene00022733	WBGene00014011	WBGene00006307
WBGene00001788		WBGene00012328	WBGene00022769	WBGene00014015	WBGene00006308
WBGene00001789		WBGene00012330	WBGene00022780	WBGene00014022	WBGene00006309
WBGene00001790		WBGene00012332	WBGene00022783	WBGene00014034	WBGene00006349
WBGene00001791		WBGene00012369	WBGene00022785	WBGene00014051	WBGene00006351
WBGene00001792		WBGene00012373	WBGene00022808	WBGene00014058	WBGene00006352
WBGene00001793		WBGene00012379	WBGene00022835	WBGene00014066	WBGene00006364
WBGene00001794		WBGene00012385	WBGene00022851	WBGene00014077	WBGene00006367
WBGene00001795		WBGene00012393	WBGene00022854	WBGene00014139	WBGene00006373
WBGene00001796		WBGene00012424	WBGene00023404	WBGene00014148	WBGene00006382
WBGene00001808		WBGene00012425	WBGene00023450	WBGene00014151	WBGene00006383
WBGene00001811		WBGene00012428	WBGene00023491	WBGene00014152	WBGene00006386
WBGene00001812		WBGene00012437	WBGene00043056	WBGene00014174	WBGene00006387
WBGene00001813		WBGene00012475	WBGene00043066	WBGene00014200	WBGene00006397
WBGene00001814		WBGene00012489	WBGene00044067	WBGene00014208	WBGene00006405
WBGene00001815		WBGene00012532	WBGene00044079	WBGene00014220	WBGene00006407
WBGene00001816		WBGene00012535	WBGene00044121	WBGene00014224	WBGene00006410
WBGene00001817		WBGene00012536	WBGene00044201	WBGene00014230	WBGene00006411
WBGene00001818		WBGene00012549	WBGene00044233	WBGene00014232	WBGene00006412
WBGene00001819		WBGene00012560	WBGene00044236	WBGene00014256	WBGene00006414
WBGene00001820		WBGene00012573	WBGene00044330	WBGene00014697	WBGene00006415
WBGene00001823		WBGene00012582	WBGene00044423	WBGene00015001	WBGene00006416
WBGene00001824		WBGene00012583	WBGene00044604	WBGene00015029	WBGene00006432
WBGene00001827		WBGene00012586	WBGene00044650	WBGene00015052	WBGene00006433
WBGene00001828		WBGene00012621	WBGene00044651	WBGene00015092	WBGene00006434
WBGene00001829		WBGene00012626	WBGene00044689	WBGene00015098	WBGene00006435
WBGene00001830		WBGene00012629	WBGene00044738	WBGene00015104	WBGene00006437
WBGene00001831		WBGene00012648	WBGene00044794	WBGene00015124	WBGene00006439
WBGene00001833		WBGene00012678	WBGene00045063	WBGene00015128	WBGene00006443
WBGene00001834		WBGene00012681	WBGene00045419	WBGene00015135	WBGene00006446
WBGene00001835		WBGene00012682	WBGene00045433	WBGene00015143	WBGene00006447
WBGene00001836		WBGene00012683	WBGene00189952	WBGene00015146	WBGene00006448
WBGene00001837		WBGene00012686	WBGene00194986	WBGene00015162	WBGene00006460
WBGene00001838		WBGene00012688	WBGene00195248	WBGene00015177	WBGene00006461
WBGene00001840		WBGene00012716	WBGene00219378	WBGene00015190	WBGene00006463
WBGene00001843		WBGene00012723	WBGene00235102	WBGene00015194	WBGene00006465
WBGene00001844		WBGene00012726		WBGene00015203	WBGene00006470
WBGene00001851		WBGene00012738		WBGene00015207	WBGene00006472
WBGene00001853		WBGene00012747		WBGene00015237	WBGene00006473
WBGene00001854		WBGene00012763		WBGene00015270	WBGene00006474
WBGene00001855		WBGene00012767		WBGene00015273	WBGene00006477
WBGene00001856		WBGene00012776		WBGene00015286	WBGene00006478
WBGene00001857		WBGene00012782		WBGene00015288	WBGene00006479
WBGene00001860		WBGene00012787		WBGene00015293	WBGene00006481
WBGene00001862		WBGene00012792		WBGene00015296	WBGene00006490
WBGene00001863		WBGene00012806		WBGene00015298	WBGene00006491
WBGene00001865		WBGene00012814		WBGene00015308	WBGene00006493
WBGene00001872		WBGene00012815		WBGene00015356	WBGene00006494
WBGene00001875		WBGene00012816		WBGene00015437	WBGene00006497
WBGene00001876		WBGene00012832		WBGene00015460	WBGene00006498
WBGene00001877		WBGene00012835		WBGene00015485	WBGene00006503
WBGene00001878		WBGene00012845		WBGene00015486	WBGene00006510
WBGene00001879		WBGene00012857		WBGene00015554	WBGene00006512
WBGene00001880		WBGene00012889		WBGene00015555	WBGene00006515
WBGene00001881		WBGene00012915		WBGene00015579	WBGene00006518
WBGene00001882		WBGene00012934		WBGene00015632	WBGene00006520
WBGene00001883		WBGene00012967		WBGene00015648	WBGene00006525
WBGene00001884		WBGene00012976		WBGene00015662	WBGene00006526
WBGene00001885		WBGene00012977		WBGene00015697	WBGene00006527
WBGene00001886		WBGene00013050		WBGene00015709	WBGene00006538
WBGene00001887		WBGene00013052		WBGene00015735	WBGene00006541
WBGene00001888		WBGene00013072		WBGene00015742	WBGene00006563
WBGene00001889		WBGene00013075		WBGene00015744	WBGene00006566
WBGene00001890		WBGene00013076		WBGene00015779	WBGene00006567
WBGene00001891		WBGene00013080		WBGene00015866	WBGene00006568
WBGene00001892		WBGene00013119		WBGene00015887	WBGene00006573
WBGene00001893		WBGene00013124		WBGene00015920	WBGene00006575
WBGene00001894		WBGene00013147		WBGene00015926	WBGene00006578
WBGene00001895		WBGene00013156		WBGene00015927	WBGene00006579
WBGene00001896		WBGene00013159		WBGene00015934	WBGene00006594
WBGene00001898		WBGene00013161		WBGene00015943	WBGene00006595
WBGene00001899		WBGene00013166		WBGene00015955	WBGene00006596
WBGene00001900		WBGene00013184		WBGene00015975	WBGene00006597
WBGene00001901		WBGene00013194		WBGene00016014	WBGene00006598
WBGene00001902		WBGene00013231		WBGene00016019	WBGene00006599
WBGene00001903		WBGene00013235		WBGene00016061	WBGene00006601
WBGene00001904		WBGene00013256		WBGene00016074	WBGene00006606
WBGene00001905		WBGene00013261		WBGene00016092	WBGene00006609
WBGene00001906		WBGene00013270		WBGene00016106	WBGene00006611
WBGene00001907		WBGene00013292		WBGene00016112	WBGene00006612
WBGene00001908		WBGene00013293		WBGene00016123	WBGene00006613
WBGene00001909		WBGene00013300		WBGene00016144	WBGene00006615
WBGene00001911		WBGene00013308		WBGene00016147	WBGene00006617
WBGene00001912		WBGene00013338		WBGene00016150	WBGene00006619
WBGene00001913		WBGene00013353		WBGene00016151	WBGene00006620
WBGene00001914		WBGene00013383		WBGene00016156	WBGene00006626
WBGene00001915		WBGene00013443		WBGene00016157	WBGene00006633
WBGene00001916		WBGene00013475		WBGene00016158	WBGene00006634
WBGene00001917		WBGene00013477		WBGene00016165	WBGene00006638
WBGene00001918		WBGene00013480		WBGene00016170	WBGene00006647
WBGene00001919		WBGene00013486		WBGene00016192	WBGene00006648
WBGene00001920		WBGene00013487		WBGene00016197	WBGene00006655
WBGene00001921		WBGene00013489		WBGene00016209	WBGene00006669
WBGene00001922		WBGene00013493		WBGene00016245	WBGene00006696
WBGene00001923		WBGene00013517		WBGene00016249	WBGene00006697
WBGene00001924		WBGene00013520		WBGene00016260	WBGene00006699
WBGene00001925		WBGene00013534		WBGene00016265	WBGene00006701
WBGene00001926		WBGene00013594		WBGene00016283	WBGene00006702
WBGene00001927		WBGene00013603		WBGene00016323	WBGene00006703
WBGene00001928		WBGene00013604		WBGene00016328	WBGene00006705
WBGene00001929		WBGene00013607		WBGene00016390	WBGene00006707
WBGene00001930		WBGene00013608		WBGene00016395	WBGene00006708
WBGene00001931		WBGene00013609		WBGene00016407	WBGene00006709
WBGene00001932		WBGene00013646		WBGene00016408	WBGene00006711
WBGene00001933		WBGene00013655		WBGene00016418	WBGene00006715
WBGene00001934		WBGene00013672		WBGene00016448	WBGene00006716
WBGene00001935		WBGene00013682		WBGene00016452	WBGene00006720
WBGene00001936		WBGene00013689		WBGene00016489	WBGene00006724
WBGene00001937		WBGene00013692		WBGene00016490	WBGene00006726
WBGene00001938		WBGene00013734		WBGene00016493	WBGene00006728
WBGene00001939		WBGene00013746		WBGene00016497	WBGene00006729
WBGene00001940		WBGene00013764		WBGene00016524	WBGene00006730
WBGene00001941		WBGene00013801		WBGene00016562	WBGene00006733
WBGene00001942		WBGene00013807		WBGene00016589	WBGene00006734
WBGene00001943		WBGene00013811		WBGene00016606	WBGene00006742
WBGene00001944		WBGene00013846		WBGene00016608	WBGene00006743
WBGene00001945		WBGene00013849		WBGene00016623	WBGene00006745
WBGene00001946		WBGene00013862		WBGene00016642	WBGene00006746
WBGene00001948		WBGene00013866		WBGene00016652	WBGene00006748
WBGene00001949		WBGene00013873		WBGene00016655	WBGene00006752
WBGene00001950		WBGene00013874		WBGene00016678	WBGene00006755
WBGene00001952		WBGene00013875		WBGene00016704	WBGene00006757
WBGene00001953		WBGene00013883		WBGene00016739	WBGene00006761
WBGene00001954		WBGene00013900		WBGene00016747	WBGene00006762
WBGene00001955		WBGene00013901		WBGene00016751	WBGene00006763
WBGene00001957		WBGene00013903		WBGene00016754	WBGene00006767
WBGene00001958		WBGene00013904		WBGene00016792	WBGene00006768
WBGene00001959		WBGene00013905		WBGene00016811	WBGene00006771
WBGene00001960		WBGene00013906		WBGene00016848	WBGene00006776
WBGene00001961		WBGene00013965		WBGene00016849	WBGene00006781
WBGene00001971		WBGene00013967		WBGene00016879	WBGene00006783
WBGene00001972		WBGene00013973		WBGene00016902	WBGene00006785
WBGene00001973		WBGene00013999		WBGene00016907	WBGene00006787
WBGene00001974		WBGene00014020		WBGene00016961	WBGene00006789
WBGene00001975		WBGene00014053		WBGene00016981	WBGene00006790
WBGene00001978		WBGene00014074		WBGene00016983	WBGene00006791
WBGene00001979		WBGene00014093		WBGene00016989	WBGene00006793
WBGene00001980		WBGene00014097		WBGene00016990	WBGene00006795
WBGene00001983		WBGene00014102		WBGene00017004	WBGene00006798
WBGene00001985		WBGene00014103		WBGene00017011	WBGene00006801
WBGene00001993		WBGene00014117		WBGene00017013	WBGene00006803
WBGene00001994		WBGene00014124		WBGene00017014	WBGene00006805
WBGene00001995		WBGene00014137		WBGene00017025	WBGene00006807
WBGene00001996		WBGene00014138		WBGene00017033	WBGene00006808
WBGene00001997		WBGene00014161		WBGene00017037	WBGene00006809
WBGene00001998		WBGene00014171		WBGene00017044	WBGene00006810
WBGene00001999		WBGene00014201		WBGene00017064	WBGene00006811
WBGene00002000		WBGene00014213		WBGene00017088	WBGene00006817
WBGene00002001		WBGene00014236		WBGene00017103	WBGene00006822
WBGene00002002		WBGene00014300		WBGene00017122	WBGene00006823
WBGene00002003		WBGene00014669		WBGene00017158	WBGene00006826
WBGene00002004		WBGene00014864		WBGene00017161	WBGene00006829
WBGene00002005		WBGene00014938		WBGene00017166	WBGene00006830
WBGene00002007		WBGene00014965		WBGene00017169	WBGene00006831
WBGene00002008		WBGene00015019		WBGene00017178	WBGene00006833
WBGene00002010		WBGene00015026		WBGene00017179	WBGene00006836
WBGene00002011		WBGene00015038		WBGene00017184	WBGene00006840
WBGene00002012		WBGene00015049		WBGene00017238	WBGene00006843
WBGene00002013		WBGene00015061		WBGene00017268	WBGene00006856
WBGene00002015		WBGene00015073		WBGene00017311	WBGene00006862
WBGene00002016		WBGene00015083		WBGene00017352	WBGene00006863
WBGene00002017		WBGene00015087		WBGene00017373	WBGene00006868
WBGene00002018		WBGene00015088		WBGene00017430	WBGene00006870
WBGene00002019		WBGene00015110		WBGene00017546	WBGene00006876
WBGene00002020		WBGene00015111		WBGene00017547	WBGene00006887
WBGene00002021		WBGene00015114		WBGene00017592	WBGene00006889
WBGene00002023		WBGene00015126		WBGene00017594	WBGene00006890
WBGene00002024		WBGene00015145		WBGene00017605	WBGene00006911
WBGene00002025		WBGene00015198		WBGene00017640	WBGene00006912
WBGene00002026		WBGene00015246		WBGene00017646	WBGene00006913
WBGene00002027		WBGene00015250		WBGene00017687	WBGene00006917
WBGene00002028		WBGene00015251		WBGene00017733	WBGene00006918
WBGene00002029		WBGene00015258		WBGene00017769	WBGene00006919
WBGene00002030		WBGene00015260		WBGene00017771	WBGene00006921
WBGene00002031		WBGene00015264		WBGene00017775	WBGene00006932
WBGene00002032		WBGene00015268		WBGene00017778	WBGene00006933
WBGene00002033		WBGene00015278		WBGene00017799	WBGene00006934
WBGene00002035		WBGene00015279		WBGene00017812	WBGene00006937
WBGene00002036		WBGene00015284		WBGene00017816	WBGene00006944
WBGene00002037		WBGene00015285		WBGene00017825	WBGene00006945
WBGene00002038		WBGene00015287		WBGene00017837	WBGene00006946
WBGene00002039		WBGene00015295		WBGene00017904	WBGene00006960
WBGene00002040		WBGene00015299		WBGene00017914	WBGene00006963
WBGene00002041		WBGene00015307		WBGene00017921	WBGene00006968
WBGene00002042		WBGene00015324		WBGene00017924	WBGene00006974
WBGene00002043		WBGene00015331		WBGene00017928	WBGene00006987
WBGene00002044		WBGene00015332		WBGene00017929	WBGene00006993
WBGene00002045		WBGene00015336		WBGene00017951	WBGene00006996
WBGene00002046		WBGene00015338		WBGene00017971	WBGene00007000
WBGene00002047		WBGene00015361		WBGene00017974	WBGene00007007
WBGene00002048		WBGene00015381		WBGene00017975	WBGene00007008
WBGene00002050		WBGene00015387		WBGene00017981	WBGene00007009
WBGene00002051		WBGene00015388		WBGene00017996	WBGene00007010
WBGene00002052		WBGene00015403		WBGene00017997	WBGene00007014
WBGene00002053		WBGene00015406		WBGene00017999	WBGene00007017
WBGene00002054		WBGene00015407		WBGene00018011	WBGene00007018
WBGene00002055		WBGene00015412		WBGene00018036	WBGene00007020
WBGene00002056		WBGene00015425		WBGene00018037	WBGene00007021
WBGene00002057		WBGene00015466		WBGene00018060	WBGene00007026
WBGene00002058		WBGene00015467		WBGene00018132	WBGene00007028
WBGene00002059		WBGene00015471		WBGene00018161	WBGene00007029
WBGene00002060		WBGene00015472		WBGene00018213	WBGene00007036
WBGene00002061		WBGene00015501		WBGene00018218	WBGene00007042
WBGene00002062		WBGene00015510		WBGene00018238	WBGene00007043
WBGene00002063		WBGene00015532		WBGene00018240	WBGene00007045
WBGene00002064		WBGene00015535		WBGene00018269	WBGene00007048
WBGene00002065		WBGene00015567		WBGene00018283	WBGene00007050
WBGene00002066		WBGene00015583		WBGene00018307	WBGene00007054
WBGene00002067		WBGene00015628		WBGene00018328	WBGene00007055
WBGene00002069		WBGene00015631		WBGene00018330	WBGene00007056
WBGene00002070		WBGene00015639		WBGene00018340	WBGene00007057
WBGene00002071		WBGene00015651		WBGene00018362	WBGene00007059
WBGene00002072		WBGene00015660		WBGene00018370	WBGene00007099
WBGene00002073		WBGene00015673		WBGene00018373	WBGene00007102
WBGene00002074		WBGene00015680		WBGene00018393	WBGene00007103
WBGene00002075		WBGene00015692		WBGene00018491	WBGene00007106
WBGene00002076		WBGene00015694		WBGene00018512	WBGene00007108
WBGene00002077		WBGene00015695		WBGene00018519	WBGene00007111
WBGene00002078		WBGene00015700		WBGene00018586	WBGene00007114
WBGene00002079		WBGene00015716		WBGene00018656	WBGene00007117
WBGene00002080		WBGene00015739		WBGene00018672	WBGene00007122
WBGene00002081		WBGene00015773		WBGene00018674	WBGene00007128
WBGene00002083		WBGene00015855		WBGene00018681	WBGene00007129
WBGene00002146		WBGene00015861		WBGene00018700	WBGene00007137
WBGene00002147		WBGene00015865		WBGene00018719	WBGene00007143
WBGene00002149		WBGene00015867		WBGene00018723	WBGene00007144
WBGene00002150		WBGene00015871		WBGene00018734	WBGene00007145
WBGene00002151		WBGene00015894		WBGene00018737	WBGene00007150
WBGene00002152		WBGene00015929		WBGene00018739	WBGene00007174
WBGene00002153		WBGene00015930		WBGene00018755	WBGene00007175
WBGene00002162		WBGene00015940		WBGene00018765	WBGene00007184
WBGene00002169		WBGene00015942		WBGene00018784	WBGene00007188
WBGene00002173		WBGene00015965		WBGene00018788	WBGene00007189
WBGene00002174		WBGene00015982		WBGene00018798	WBGene00007194
WBGene00002175		WBGene00015993		WBGene00018835	WBGene00007197
WBGene00002176		WBGene00016006		WBGene00018853	WBGene00007201
WBGene00002177		WBGene00016013		WBGene00018857	WBGene00007202
WBGene00002178		WBGene00016022		WBGene00018869	WBGene00007210
WBGene00002179		WBGene00016063		WBGene00018872	WBGene00007216
WBGene00002180		WBGene00016064		WBGene00018891	WBGene00007217
WBGene00002181		WBGene00016066		WBGene00018892	WBGene00007226
WBGene00002182		WBGene00016072		WBGene00018898	WBGene00007234
WBGene00002183		WBGene00016085		WBGene00018901	WBGene00007235
WBGene00002184		WBGene00016088		WBGene00018953	WBGene00007236
WBGene00002185		WBGene00016104		WBGene00018964	WBGene00007256
WBGene00002186		WBGene00016111		WBGene00018966	WBGene00007267
WBGene00002189		WBGene00016134		WBGene00018974	WBGene00007277
WBGene00002190		WBGene00016135		WBGene00018976	WBGene00007287
WBGene00002191		WBGene00016152		WBGene00018984	WBGene00007302
WBGene00002192		WBGene00016154		WBGene00018995	WBGene00007330
WBGene00002193		WBGene00016189		WBGene00018996	WBGene00007350
WBGene00002194		WBGene00016190		WBGene00019004	WBGene00007351
WBGene00002195		WBGene00016191		WBGene00019005	WBGene00007352
WBGene00002196		WBGene00016196		WBGene00019074	WBGene00007355
WBGene00002198		WBGene00016202		WBGene00019108	WBGene00007387
WBGene00002199		WBGene00016221		WBGene00019109	WBGene00007388
WBGene00002200		WBGene00016247		WBGene00019125	WBGene00007400
WBGene00002201		WBGene00016251		WBGene00019126	WBGene00007412
WBGene00002202		WBGene00016252		WBGene00019168	WBGene00007413
WBGene00002203		WBGene00016253		WBGene00019196	WBGene00007428
WBGene00002204		WBGene00016294		WBGene00019217	WBGene00007429
WBGene00002205		WBGene00016300		WBGene00019220	WBGene00007434
WBGene00002206		WBGene00016306		WBGene00019225	WBGene00007435
WBGene00002207		WBGene00016348		WBGene00019230	WBGene00007438
WBGene00002208		WBGene00016373		WBGene00019237	WBGene00007444
WBGene00002210		WBGene00016375		WBGene00019246	WBGene00007446
WBGene00002211		WBGene00016382		WBGene00019299	WBGene00007463
WBGene00002213		WBGene00016389		WBGene00019301	WBGene00007480
WBGene00002214		WBGene00016397		WBGene00019328	WBGene00007505
WBGene00002215		WBGene00016412		WBGene00019364	WBGene00007507
WBGene00002216		WBGene00016413		WBGene00019365	WBGene00007508
WBGene00002217		WBGene00016416		WBGene00019376	WBGene00007509
WBGene00002218		WBGene00016423		WBGene00019395	WBGene00007514
WBGene00002219		WBGene00016427		WBGene00019403	WBGene00007516
WBGene00002222		WBGene00016431		WBGene00019404	WBGene00007517
WBGene00002223		WBGene00016443		WBGene00019427	WBGene00007528
WBGene00002224		WBGene00016450		WBGene00019460	WBGene00007531
WBGene00002225		WBGene00016451		WBGene00019481	WBGene00007534
WBGene00002226		WBGene00016462		WBGene00019498	WBGene00007548
WBGene00002227		WBGene00016468		WBGene00019536	WBGene00007549
WBGene00002228		WBGene00016504		WBGene00019537	WBGene00007554
WBGene00002229		WBGene00016558		WBGene00019609	WBGene00007555
WBGene00002230		WBGene00016566		WBGene00019628	WBGene00007556
WBGene00002232		WBGene00016577		WBGene00019629	WBGene00007561
WBGene00002233		WBGene00016595		WBGene00019636	WBGene00007564
WBGene00002234		WBGene00016613		WBGene00019656	WBGene00007576
WBGene00002235		WBGene00016628		WBGene00019678	WBGene00007581
WBGene00002238		WBGene00016661		WBGene00019682	WBGene00007588
WBGene00002239		WBGene00016698		WBGene00019686	WBGene00007593
WBGene00002240		WBGene00016721		WBGene00019693	WBGene00007595
WBGene00002242		WBGene00016728		WBGene00019725	WBGene00007617
WBGene00002243		WBGene00016762		WBGene00019726	WBGene00007620
WBGene00002244		WBGene00016764		WBGene00019766	WBGene00007622
WBGene00002245		WBGene00016769		WBGene00019771	WBGene00007623
WBGene00002247		WBGene00016803		WBGene00019806	WBGene00007625
WBGene00002248		WBGene00016841		WBGene00019832	WBGene00007626
WBGene00002249		WBGene00016845		WBGene00019846	WBGene00007666
WBGene00002250		WBGene00016890		WBGene00019875	WBGene00007686
WBGene00002251		WBGene00016912		WBGene00019888	WBGene00007690
WBGene00002252		WBGene00016942		WBGene00019962	WBGene00007696
WBGene00002257		WBGene00016944		WBGene00019979	WBGene00007703
WBGene00002258		WBGene00016948		WBGene00020004	WBGene00007707
WBGene00002259		WBGene00016951		WBGene00020017	WBGene00007712
WBGene00002260		WBGene00016954		WBGene00020088	WBGene00007730
WBGene00002261		WBGene00016970		WBGene00020092	WBGene00007744
WBGene00002262		WBGene00016974		WBGene00020112	WBGene00007745
WBGene00002263		WBGene00016984		WBGene00020114	WBGene00007752
WBGene00002264		WBGene00016991		WBGene00020191	WBGene00007753
WBGene00002265		WBGene00016996		WBGene00020222	WBGene00007755
WBGene00002266		WBGene00017026		WBGene00020230	WBGene00007784
WBGene00002267		WBGene00017028		WBGene00020231	WBGene00007787
WBGene00002268		WBGene00017034		WBGene00020235	WBGene00007799
WBGene00002269		WBGene00017045		WBGene00020251	WBGene00007801
WBGene00002270		WBGene00017055		WBGene00020254	WBGene00007812
WBGene00002271		WBGene00017069		WBGene00020262	WBGene00007836
WBGene00002272		WBGene00017078		WBGene00020266	WBGene00007848
WBGene00002273		WBGene00017080		WBGene00020283	WBGene00007860
WBGene00002275		WBGene00017083		WBGene00020295	WBGene00007878
WBGene00002276		WBGene00017098		WBGene00020296	WBGene00007882
WBGene00002278		WBGene00017108		WBGene00020320	WBGene00007886
WBGene00002280		WBGene00017124		WBGene00020321	WBGene00007904
WBGene00002282		WBGene00017135		WBGene00020334	WBGene00007917
WBGene00002295		WBGene00017140		WBGene00020348	WBGene00007918
WBGene00002297		WBGene00017157		WBGene00020366	WBGene00007922
WBGene00002299		WBGene00017170		WBGene00020373	WBGene00007924
WBGene00002324		WBGene00017176		WBGene00020374	WBGene00007927
WBGene00002335		WBGene00017195		WBGene00020423	WBGene00007941
WBGene00002344		WBGene00017219		WBGene00020426	WBGene00007942
WBGene00002348		WBGene00017262		WBGene00020490	WBGene00007952
WBGene00002363		WBGene00017277		WBGene00020516	WBGene00007953
WBGene00002497		WBGene00017279		WBGene00020553	WBGene00007956
WBGene00002583		WBGene00017285		WBGene00020572	WBGene00007959
WBGene00002601		WBGene00017310		WBGene00020588	WBGene00007969
WBGene00002632		WBGene00017314		WBGene00020601	WBGene00007971
WBGene00002637		WBGene00017315		WBGene00020612	WBGene00007972
WBGene00002694		WBGene00017327		WBGene00020658	WBGene00007974
WBGene00002696		WBGene00017329		WBGene00020705	WBGene00007979
WBGene00002717		WBGene00017331		WBGene00020706	WBGene00007980
WBGene00002783		WBGene00017332		WBGene00020757	WBGene00007982
WBGene00002804		WBGene00017333		WBGene00020770	WBGene00007993
WBGene00002845		WBGene00017336		WBGene00020782	WBGene00008000
WBGene00002850		WBGene00017360		WBGene00020821	WBGene00008006
WBGene00002855		WBGene00017364		WBGene00020825	WBGene00008008
WBGene00002879		WBGene00017369		WBGene00020837	WBGene00008018
WBGene00002881		WBGene00017375		WBGene00020839	WBGene00008019
WBGene00002889		WBGene00017387		WBGene00020868	WBGene00008033
WBGene00002891		WBGene00017388		WBGene00020875	WBGene00008041
WBGene00002915		WBGene00017394		WBGene00020888	WBGene00008052
WBGene00002957		WBGene00017399		WBGene00020889	WBGene00008053
WBGene00002974		WBGene00017427		WBGene00020902	WBGene00008078
WBGene00002975		WBGene00017428		WBGene00020924	WBGene00008117
WBGene00002976		WBGene00017437		WBGene00020930	WBGene00008119
WBGene00002978		WBGene00017443		WBGene00020937	WBGene00008121
WBGene00002979		WBGene00017449		WBGene00020953	WBGene00008131
WBGene00002980		WBGene00017471		WBGene00020955	WBGene00008132
WBGene00002981		WBGene00017513		WBGene00020964	WBGene00008133
WBGene00002982		WBGene00017535		WBGene00020989	WBGene00008136
WBGene00002985		WBGene00017543		WBGene00021058	WBGene00008148
WBGene00002986		WBGene00017544		WBGene00021059	WBGene00008149
WBGene00002987		WBGene00017571		WBGene00021061	WBGene00008151
WBGene00002988		WBGene00017576		WBGene00021073	WBGene00008164
WBGene00002989		WBGene00017580		WBGene00021128	WBGene00008165
WBGene00002990		WBGene00017615		WBGene00021133	WBGene00008167
WBGene00002991		WBGene00017620		WBGene00021167	WBGene00008205
WBGene00002996		WBGene00017630		WBGene00021176	WBGene00008220
WBGene00002998		WBGene00017647		WBGene00021185	WBGene00008225
WBGene00002999		WBGene00017648		WBGene00021200	WBGene00008237
WBGene00003000		WBGene00017657		WBGene00021213	WBGene00008239
WBGene00003001		WBGene00017671		WBGene00021215	WBGene00008258
WBGene00003006		WBGene00017676		WBGene00021227	WBGene00008273
WBGene00003007		WBGene00017678		WBGene00021276	WBGene00008288
WBGene00003008		WBGene00017690		WBGene00021295	WBGene00008311
WBGene00003009		WBGene00017710		WBGene00021311	WBGene00008317
WBGene00003014		WBGene00017736		WBGene00021312	WBGene00008320
WBGene00003015		WBGene00017737		WBGene00021324	WBGene00008338
WBGene00003017		WBGene00017770		WBGene00021327	WBGene00008339
WBGene00003018		WBGene00017791		WBGene00021344	WBGene00008345
WBGene00003020		WBGene00017800		WBGene00021346	WBGene00008354
WBGene00003024		WBGene00017865		WBGene00021349	WBGene00008364
WBGene00003025		WBGene00017876		WBGene00021354	WBGene00008366
WBGene00003026		WBGene00017879		WBGene00021406	WBGene00008370
WBGene00003029		WBGene00017881		WBGene00021427	WBGene00008371
WBGene00003030		WBGene00017916		WBGene00021461	WBGene00008379
WBGene00003033		WBGene00017937		WBGene00021474	WBGene00008386
WBGene00003034		WBGene00017944		WBGene00021475	WBGene00008398
WBGene00003035		WBGene00017947		WBGene00021486	WBGene00008402
WBGene00003036		WBGene00017948		WBGene00021494	WBGene00008405
WBGene00003037		WBGene00017959		WBGene00021507	WBGene00008408
WBGene00003040		WBGene00017967		WBGene00021515	WBGene00008410
WBGene00003041		WBGene00017969		WBGene00021535	WBGene00008411
WBGene00003043		WBGene00017982		WBGene00021536	WBGene00008412
WBGene00003047		WBGene00018000		WBGene00021544	WBGene00008415
WBGene00003048		WBGene00018002		WBGene00021549	WBGene00008419
WBGene00003052		WBGene00018034		WBGene00021551	WBGene00008425
WBGene00003055		WBGene00018035		WBGene00021555	WBGene00008430
WBGene00003057		WBGene00018046		WBGene00021596	WBGene00008431
WBGene00003058		WBGene00018051		WBGene00021645	WBGene00008435
WBGene00003059		WBGene00018056		WBGene00021660	WBGene00008439
WBGene00003060		WBGene00018071		WBGene00021661	WBGene00008452
WBGene00003061		WBGene00018105		WBGene00021667	WBGene00008455
WBGene00003062		WBGene00018124		WBGene00021698	WBGene00008456
WBGene00003063		WBGene00018135		WBGene00021733	WBGene00008480
WBGene00003064		WBGene00018137		WBGene00021741	WBGene00008502
WBGene00003066		WBGene00018151		WBGene00021748	WBGene00008505
WBGene00003068		WBGene00018205		WBGene00021750	WBGene00008506
WBGene00003071		WBGene00018209		WBGene00021752	WBGene00008514
WBGene00003072		WBGene00018210		WBGene00021789	WBGene00008531
WBGene00003073		WBGene00018215		WBGene00021796	WBGene00008532
WBGene00003074		WBGene00018246		WBGene00021810	WBGene00008538
WBGene00003075		WBGene00018301		WBGene00021816	WBGene00008546
WBGene00003076		WBGene00018317		WBGene00021818	WBGene00008547
WBGene00003077		WBGene00018333		WBGene00021829	WBGene00008548
WBGene00003078		WBGene00018349		WBGene00021831	WBGene00008564
WBGene00003079		WBGene00018350		WBGene00021842	WBGene00008565
WBGene00003080		WBGene00018358		WBGene00021857	WBGene00008566
WBGene00003081		WBGene00018361		WBGene00021867	WBGene00008567
WBGene00003082		WBGene00018365		WBGene00021870	WBGene00008571
WBGene00003084		WBGene00018376		WBGene00021893	WBGene00008586
WBGene00003085		WBGene00018384		WBGene00021902	WBGene00008606
WBGene00003086		WBGene00018385		WBGene00021904	WBGene00008624
WBGene00003089		WBGene00018392		WBGene00021921	WBGene00008639
WBGene00003100		WBGene00018402		WBGene00021932	WBGene00008642
WBGene00003102		WBGene00018403		WBGene00021960	WBGene00008645
WBGene00003106		WBGene00018414		WBGene00021985	WBGene00008646
WBGene00003107		WBGene00018465		WBGene00022019	WBGene00008654
WBGene00003111		WBGene00018468		WBGene00022021	WBGene00008664
WBGene00003112		WBGene00018478		WBGene00022045	WBGene00008685
WBGene00003119		WBGene00018479		WBGene00022046	WBGene00008686
WBGene00003123		WBGene00018480		WBGene00022069	WBGene00008693
WBGene00003124		WBGene00018504		WBGene00022092	WBGene00008694
WBGene00003129		WBGene00018518		WBGene00022115	WBGene00008706
WBGene00003130		WBGene00018525		WBGene00022129	WBGene00008729
WBGene00003132		WBGene00018530		WBGene00022130	WBGene00008733
WBGene00003133		WBGene00018543		WBGene00022139	WBGene00008741
WBGene00003134		WBGene00018563		WBGene00022141	WBGene00008765
WBGene00003136		WBGene00018572		WBGene00022148	WBGene00008766
WBGene00003142		WBGene00018591		WBGene00022162	WBGene00008767
WBGene00003143		WBGene00018593		WBGene00022170	WBGene00008769
WBGene00003144		WBGene00018594		WBGene00022172	WBGene00008774
WBGene00003148		WBGene00018603		WBGene00022188	WBGene00008775
WBGene00003149		WBGene00018611		WBGene00022201	WBGene00008780
WBGene00003150		WBGene00018659		WBGene00022251	WBGene00008781
WBGene00003151		WBGene00018660		WBGene00022273	WBGene00008800
WBGene00003153		WBGene00018692		WBGene00022336	WBGene00008806
WBGene00003154		WBGene00018710		WBGene00022377	WBGene00008809
WBGene00003155		WBGene00018740		WBGene00022381	WBGene00008810
WBGene00003156		WBGene00018741		WBGene00022389	WBGene00008819
WBGene00003157		WBGene00018763		WBGene00022391	WBGene00008832
WBGene00003158		WBGene00018764		WBGene00022401	WBGene00008852
WBGene00003159		WBGene00018774		WBGene00022402	WBGene00008856
WBGene00003160		WBGene00018779		WBGene00022420	WBGene00008876
WBGene00003161		WBGene00018781		WBGene00022423	WBGene00008877
WBGene00003162		WBGene00018783		WBGene00022460	WBGene00008919
WBGene00003163		WBGene00018812		WBGene00022463	WBGene00008920
WBGene00003164		WBGene00018867		WBGene00022465	WBGene00008924
WBGene00003165		WBGene00018878		WBGene00022469	WBGene00008927
WBGene00003166		WBGene00018880		WBGene00022471	WBGene00008939
WBGene00003168		WBGene00018895		WBGene00022473	WBGene00008950
WBGene00003169		WBGene00018904		WBGene00022493	WBGene00008956
WBGene00003170		WBGene00018906		WBGene00022498	WBGene00008959
WBGene00003171		WBGene00018930		WBGene00022518	WBGene00008974
WBGene00003172		WBGene00018935		WBGene00022519	WBGene00008979
WBGene00003173		WBGene00018949		WBGene00022583	WBGene00008999
WBGene00003174		WBGene00018959		WBGene00022593	WBGene00009002
WBGene00003175		WBGene00018982		WBGene00022599	WBGene00009006
WBGene00003177		WBGene00018987		WBGene00022616	WBGene00009007
WBGene00003178		WBGene00018997		WBGene00022646	WBGene00009010
WBGene00003182		WBGene00018999		WBGene00022673	WBGene00009012
WBGene00003183		WBGene00019055		WBGene00022694	WBGene00009023
WBGene00003185		WBGene00019069		WBGene00022721	WBGene00009035
WBGene00003186		WBGene00019081		WBGene00022738	WBGene00009045
WBGene00003196		WBGene00019094		WBGene00022744	WBGene00009048
WBGene00003209		WBGene00019104		WBGene00022759	WBGene00009049
WBGene00003210		WBGene00019105		WBGene00022765	WBGene00009050
WBGene00003214		WBGene00019146		WBGene00022787	WBGene00009051
WBGene00003218		WBGene00019151		WBGene00022789	WBGene00009057
WBGene00003220		WBGene00019185		WBGene00022792	WBGene00009064
WBGene00003222		WBGene00019212		WBGene00022797	WBGene00009065
WBGene00003224		WBGene00019227		WBGene00022812	WBGene00009082
WBGene00003225		WBGene00019229		WBGene00022815	WBGene00009084
WBGene00003229		WBGene00019232		WBGene00022816	WBGene00009092
WBGene00003232		WBGene00019233		WBGene00022837	WBGene00009100
WBGene00003233		WBGene00019234		WBGene00022852	WBGene00009116
WBGene00003234		WBGene00019235		WBGene00022853	WBGene00009119
WBGene00003235		WBGene00019249		WBGene00022865	WBGene00009120
WBGene00003238		WBGene00019268		WBGene00023422	WBGene00009122
WBGene00003239		WBGene00019270		WBGene00043064	WBGene00009123
WBGene00003241		WBGene00019272		WBGene00043097	WBGene00009124
WBGene00003242		WBGene00019273		WBGene00043705	WBGene00009126
WBGene00003243		WBGene00019274		WBGene00043986	WBGene00009131
WBGene00003246		WBGene00019314		WBGene00044061	WBGene00009138
WBGene00003247		WBGene00019317		WBGene00044144	WBGene00009140
WBGene00003253		WBGene00019339		WBGene00044303	WBGene00009145
WBGene00003254		WBGene00019342		WBGene00044325	WBGene00009155
WBGene00003258		WBGene00019344		WBGene00044326	WBGene00009158
WBGene00003367		WBGene00019346		WBGene00044440	WBGene00009163
WBGene00003368		WBGene00019351		WBGene00044609	WBGene00009164
WBGene00003369		WBGene00019352		WBGene00044614	WBGene00009172
WBGene00003370		WBGene00019379		WBGene00044631	WBGene00009177
WBGene00003371		WBGene00019407		WBGene00044697	WBGene00009186
WBGene00003372		WBGene00019408		WBGene00044734	WBGene00009187
WBGene00003373		WBGene00019451		WBGene00044736	WBGene00009207
WBGene00003374		WBGene00019461		WBGene00044903	WBGene00009211
WBGene00003375		WBGene00019479		WBGene00044924	WBGene00009218
WBGene00003376		WBGene00019489		WBGene00044989	WBGene00009232
WBGene00003377		WBGene00019510		WBGene00045338	WBGene00009246
WBGene00003378		WBGene00019515		WBGene00077500	WBGene00009260
WBGene00003380		WBGene00019516		WBGene00077521	WBGene00009262
WBGene00003384		WBGene00019530		WBGene00077643	WBGene00009264
WBGene00003385		WBGene00019531		WBGene00077701	WBGene00009266
WBGene00003386		WBGene00019546		WBGene00077771	WBGene00009277
WBGene00003387		WBGene00019590		WBGene00185001	WBGene00009285
WBGene00003388		WBGene00019605		WBGene00185048	WBGene00009287
WBGene00003389		WBGene00019608		WBGene00194707	WBGene00009290
WBGene00003390		WBGene00019619		WBGene00194934	WBGene00009292
WBGene00003391		WBGene00019649		WBGene00219274	WBGene00009305
WBGene00003392		WBGene00019665		WBGene00219316	WBGene00009319
WBGene00003393		WBGene00019677			WBGene00009320
WBGene00003394		WBGene00019746			WBGene00009322
WBGene00003395		WBGene00019756			WBGene00009334
WBGene00003396		WBGene00019757			WBGene00009335
WBGene00003397		WBGene00019767			WBGene00009336
WBGene00003400		WBGene00019792			WBGene00009342
WBGene00003401		WBGene00019801			WBGene00009352
WBGene00003402		WBGene00019811			WBGene00009354
WBGene00003404		WBGene00019814			WBGene00009366
WBGene00003405		WBGene00019815			WBGene00009368
WBGene00003406		WBGene00019842			WBGene00009369
WBGene00003407		WBGene00019844			WBGene00009372
WBGene00003408		WBGene00019869			WBGene00009436
WBGene00003409		WBGene00019884			WBGene00009439
WBGene00003410		WBGene00019885			WBGene00009440
WBGene00003411		WBGene00019886			WBGene00009441
WBGene00003412		WBGene00019899			WBGene00009450
WBGene00003413		WBGene00019901			WBGene00009452
WBGene00003414		WBGene00019919			WBGene00009478
WBGene00003415		WBGene00019920			WBGene00009498
WBGene00003417		WBGene00019928			WBGene00009503
WBGene00003418		WBGene00019959			WBGene00009521
WBGene00003421		WBGene00019977			WBGene00009531
WBGene00003422		WBGene00019978			WBGene00009542
WBGene00003423		WBGene00020046			WBGene00009552
WBGene00003472		WBGene00020048			WBGene00009554
WBGene00003475		WBGene00020089			WBGene00009557
WBGene00003476		WBGene00020106			WBGene00009559
WBGene00003477		WBGene00020111			WBGene00009563
WBGene00003478		WBGene00020134			WBGene00009574
WBGene00003479		WBGene00020149			WBGene00009575
WBGene00003480		WBGene00020151			WBGene00009580
WBGene00003482		WBGene00020154			WBGene00009583
WBGene00003485		WBGene00020220			WBGene00009617
WBGene00003495		WBGene00020236			WBGene00009618
WBGene00003497		WBGene00020263			WBGene00009619
WBGene00003504		WBGene00020300			WBGene00009622
WBGene00003509		WBGene00020324			WBGene00009628
WBGene00003510		WBGene00020327			WBGene00009635
WBGene00003511		WBGene00020328			WBGene00009647
WBGene00003514		WBGene00020380			WBGene00009654
WBGene00003515		WBGene00020419			WBGene00009658
WBGene00003516		WBGene00020425			WBGene00009664
WBGene00003517		WBGene00020442			WBGene00009666
WBGene00003518		WBGene00020465			WBGene00009668
WBGene00003519		WBGene00020496			WBGene00009671
WBGene00003523		WBGene00020503			WBGene00009672
WBGene00003526		WBGene00020504			WBGene00009674
WBGene00003527		WBGene00020528			WBGene00009681
WBGene00003532		WBGene00020559			WBGene00009711
WBGene00003533		WBGene00020567			WBGene00009726
WBGene00003535		WBGene00020575			WBGene00009732
WBGene00003536		WBGene00020587			WBGene00009734
WBGene00003537		WBGene00020590			WBGene00009736
WBGene00003538		WBGene00020592			WBGene00009769
WBGene00003539		WBGene00020593			WBGene00009771
WBGene00003540		WBGene00020594			WBGene00009772
WBGene00003541		WBGene00020605			WBGene00009776
WBGene00003542		WBGene00020631			WBGene00009781
WBGene00003543		WBGene00020633			WBGene00009783
WBGene00003544		WBGene00020648			WBGene00009784
WBGene00003545		WBGene00020651			WBGene00009793
WBGene00003546		WBGene00020655			WBGene00009812
WBGene00003547		WBGene00020657			WBGene00009813
WBGene00003548		WBGene00020673			WBGene00009829
WBGene00003549		WBGene00020674			WBGene00009831
WBGene00003550		WBGene00020678			WBGene00009867
WBGene00003551		WBGene00020688			WBGene00009902
WBGene00003552		WBGene00020693			WBGene00009903
WBGene00003553		WBGene00020701			WBGene00009918
WBGene00003554		WBGene00020702			WBGene00009919
WBGene00003555		WBGene00020767			WBGene00009920
WBGene00003558		WBGene00020788			WBGene00009925
WBGene00003559		WBGene00020797			WBGene00009944
WBGene00003561		WBGene00020800			WBGene00009947
WBGene00003562		WBGene00020810			WBGene00009952
WBGene00003563		WBGene00020827			WBGene00009966
WBGene00003564		WBGene00020841			WBGene00009976
WBGene00003566		WBGene00020847			WBGene00009978
WBGene00003567		WBGene00020867			WBGene00009987
WBGene00003568		WBGene00020884			WBGene00009992
WBGene00003569		WBGene00020895			WBGene00010015
WBGene00003570		WBGene00020897			WBGene00010035
WBGene00003571		WBGene00020908			WBGene00010038
WBGene00003572		WBGene00020927			WBGene00010040
WBGene00003573		WBGene00020954			WBGene00010042
WBGene00003574		WBGene00020961			WBGene00010044
WBGene00003575		WBGene00020966			WBGene00010045
WBGene00003576		WBGene00021003			WBGene00010052
WBGene00003578		WBGene00021021			WBGene00010054
WBGene00003579		WBGene00021022			WBGene00010055
WBGene00003580		WBGene00021070			WBGene00010061
WBGene00003581		WBGene00021072			WBGene00010062
WBGene00003582		WBGene00021075			WBGene00010075
WBGene00003583		WBGene00021125			WBGene00010083
WBGene00003584		WBGene00021146			WBGene00010089
WBGene00003585		WBGene00021201			WBGene00010094
WBGene00003586		WBGene00021237			WBGene00010097
WBGene00003587		WBGene00021238			WBGene00010111
WBGene00003588		WBGene00021260			WBGene00010130
WBGene00003589		WBGene00021305			WBGene00010131
WBGene00003590		WBGene00021332			WBGene00010160
WBGene00003592		WBGene00021338			WBGene00010166
WBGene00003593		WBGene00021345			WBGene00010178
WBGene00003594		WBGene00021353			WBGene00010197
WBGene00003595		WBGene00021368			WBGene00010214
WBGene00003596		WBGene00021372			WBGene00010232
WBGene00003597		WBGene00021403			WBGene00010233
WBGene00003598		WBGene00021407			WBGene00010260
WBGene00003599		WBGene00021435			WBGene00010272
WBGene00003601		WBGene00021437			WBGene00010279
WBGene00003605		WBGene00021448			WBGene00010283
WBGene00003607		WBGene00021464			WBGene00010284
WBGene00003613		WBGene00021527			WBGene00010286
WBGene00003622		WBGene00021545			WBGene00010296
WBGene00003623		WBGene00021548			WBGene00010303
WBGene00003628		WBGene00021553			WBGene00010308
WBGene00003629		WBGene00021578			WBGene00010317
WBGene00003639		WBGene00021613			WBGene00010325
WBGene00003654		WBGene00021615			WBGene00010326
WBGene00003657		WBGene00021640			WBGene00010333
WBGene00003659		WBGene00021646			WBGene00010336
WBGene00003675		WBGene00021662			WBGene00010369
WBGene00003681		WBGene00021679			WBGene00010370
WBGene00003709		WBGene00021682			WBGene00010386
WBGene00003729		WBGene00021691			WBGene00010397
WBGene00003730		WBGene00021692			WBGene00010405
WBGene00003731		WBGene00021702			WBGene00010406
WBGene00003732		WBGene00021721			WBGene00010408
WBGene00003733		WBGene00021745			WBGene00010423
WBGene00003734		WBGene00021751			WBGene00010428
WBGene00003735		WBGene00021759			WBGene00010435
WBGene00003736		WBGene00021766			WBGene00010436
WBGene00003738		WBGene00021787			WBGene00010437
WBGene00003772		WBGene00021793			WBGene00010444
WBGene00003773		WBGene00021797			WBGene00010450
WBGene00003774		WBGene00021839			WBGene00010459
WBGene00003775		WBGene00021853			WBGene00010478
WBGene00003776		WBGene00021877			WBGene00010480
WBGene00003777		WBGene00021897			WBGene00010481
WBGene00003778		WBGene00021939			WBGene00010484
WBGene00003779		WBGene00021943			WBGene00010485
WBGene00003787		WBGene00021948			WBGene00010488
WBGene00003788		WBGene00021983			WBGene00010496
WBGene00003789		WBGene00022000			WBGene00010537
WBGene00003793		WBGene00022004			WBGene00010540
WBGene00003794		WBGene00022006			WBGene00010556
WBGene00003795		WBGene00022007			WBGene00010564
WBGene00003796		WBGene00022014			WBGene00010565
WBGene00003797		WBGene00022026			WBGene00010589
WBGene00003798		WBGene00022030			WBGene00010595
WBGene00003799		WBGene00022073			WBGene00010615
WBGene00003800		WBGene00022103			WBGene00010622
WBGene00003802		WBGene00022106			WBGene00010627
WBGene00003803		WBGene00022110			WBGene00010628
WBGene00003804		WBGene00022155			WBGene00010629
WBGene00003805		WBGene00022168			WBGene00010631
WBGene00003806		WBGene00022177			WBGene00010664
WBGene00003807		WBGene00022189			WBGene00010665
WBGene00003808		WBGene00022203			WBGene00010670
WBGene00003815		WBGene00022207			WBGene00010685
WBGene00003816		WBGene00022219			WBGene00010697
WBGene00003818		WBGene00022223			WBGene00010699
WBGene00003821		WBGene00022235			WBGene00010705
WBGene00003822		WBGene00022236			WBGene00010706
WBGene00003825		WBGene00022247			WBGene00010707
WBGene00003826		WBGene00022250			WBGene00010713
WBGene00003827		WBGene00022257			WBGene00010720
WBGene00003828		WBGene00022261			WBGene00010721
WBGene00003829		WBGene00022271			WBGene00010725
WBGene00003830		WBGene00022289			WBGene00010734
WBGene00003831		WBGene00022300			WBGene00010757
WBGene00003834		WBGene00022307			WBGene00010758
WBGene00003835		WBGene00022392			WBGene00010769
WBGene00003836		WBGene00022397			WBGene00010776
WBGene00003838		WBGene00022427			WBGene00010778
WBGene00003839		WBGene00022429			WBGene00010785
WBGene00003840		WBGene00022489			WBGene00010788
WBGene00003841		WBGene00022492			WBGene00010789
WBGene00003842		WBGene00022511			WBGene00010794
WBGene00003843		WBGene00022536			WBGene00010803
WBGene00003844		WBGene00022538			WBGene00010805
WBGene00003845		WBGene00022554			WBGene00010809
WBGene00003846		WBGene00022565			WBGene00010810
WBGene00003847		WBGene00022566			WBGene00010811
WBGene00003850		WBGene00022568			WBGene00010813
WBGene00003851		WBGene00022569			WBGene00010815
WBGene00003858		WBGene00022571			WBGene00010838
WBGene00003862		WBGene00022575			WBGene00010839
WBGene00003863		WBGene00022577			WBGene00010842
WBGene00003864		WBGene00022579			WBGene00010844
WBGene00003865		WBGene00022580			WBGene00010846
WBGene00003870		WBGene00022592			WBGene00010847
WBGene00003876		WBGene00022613			WBGene00010872
WBGene00003877		WBGene00022634			WBGene00010875
WBGene00003878		WBGene00022641			WBGene00010882
WBGene00003882		WBGene00022643			WBGene00010889
WBGene00003883		WBGene00022647			WBGene00010892
WBGene00003884		WBGene00022672			WBGene00010896
WBGene00003885		WBGene00022682			WBGene00010911
WBGene00003886		WBGene00022709			WBGene00010912
WBGene00003889		WBGene00022741			WBGene00010924
WBGene00003892		WBGene00022748			WBGene00010941
WBGene00003893		WBGene00022753			WBGene00010974
WBGene00003898		WBGene00022770			WBGene00010983
WBGene00003901		WBGene00022772			WBGene00010984
WBGene00003902		WBGene00022773			WBGene00010988
WBGene00003903		WBGene00022778			WBGene00011003
WBGene00003904		WBGene00022840			WBGene00011004
WBGene00003905		WBGene00022866			WBGene00011029
WBGene00003906		WBGene00022867			WBGene00011032
WBGene00003907		WBGene00022868			WBGene00011038
WBGene00003909		WBGene00022870			WBGene00011050
WBGene00003911		WBGene00022871			WBGene00011065
WBGene00003912		WBGene00022872			WBGene00011071
WBGene00003914		WBGene00022873			WBGene00011083
WBGene00003915		WBGene00022881			WBGene00011089
WBGene00003916		WBGene00022887			WBGene00011095
WBGene00003918		WBGene00023409			WBGene00011106
WBGene00003919		WBGene00023410			WBGene00011110
WBGene00003920		WBGene00023423			WBGene00011111
WBGene00003921		WBGene00023451			WBGene00011116
WBGene00003922		WBGene00044044			WBGene00011119
WBGene00003923		WBGene00044078			WBGene00011122
WBGene00003924		WBGene00044083			WBGene00011128
WBGene00003925		WBGene00044260			WBGene00011142
WBGene00003926		WBGene00044281			WBGene00011147
WBGene00003927		WBGene00044286			WBGene00011201
WBGene00003928		WBGene00044302			WBGene00011216
WBGene00003929		WBGene00044322			WBGene00011224
WBGene00003930		WBGene00044331			WBGene00011226
WBGene00003931		WBGene00044332			WBGene00011232
WBGene00003932		WBGene00044344			WBGene00011237
WBGene00003933		WBGene00044355			WBGene00011239
WBGene00003934		WBGene00044404			WBGene00011250
WBGene00003937		WBGene00044528			WBGene00011253
WBGene00003938		WBGene00044568			WBGene00011261
WBGene00003939		WBGene00044608			WBGene00011269
WBGene00003941		WBGene00044612			WBGene00011271
WBGene00003943		WBGene00044620			WBGene00011272
WBGene00003947		WBGene00044623			WBGene00011274
WBGene00003948		WBGene00044674			WBGene00011275
WBGene00003949		WBGene00044705			WBGene00011280
WBGene00003950		WBGene00044760			WBGene00011281
WBGene00003951		WBGene00044790			WBGene00011302
WBGene00003952		WBGene00044791			WBGene00011303
WBGene00003953		WBGene00044798			WBGene00011304
WBGene00003954		WBGene00044811			WBGene00011305
WBGene00003955		WBGene00045103			WBGene00011306
WBGene00003956		WBGene00045215			WBGene00011307
WBGene00003957		WBGene00045237			WBGene00011329
WBGene00003958		WBGene00045339			WBGene00011344
WBGene00003959		WBGene00045379			WBGene00011352
WBGene00003961		WBGene00045407			WBGene00011368
WBGene00003962		WBGene00045484			WBGene00011391
WBGene00003963		WBGene00050893			WBGene00011393
WBGene00003964		WBGene00077490			WBGene00011398
WBGene00003965		WBGene00077655			WBGene00011399
WBGene00003966		WBGene00077680			WBGene00011407
WBGene00003967		WBGene00077688			WBGene00011409
WBGene00003969		WBGene00077696			WBGene00011412
WBGene00003970		WBGene00077697			WBGene00011417
WBGene00003975		WBGene00077763			WBGene00011420
WBGene00003976		WBGene00086546			WBGene00011440
WBGene00003978		WBGene00194710			WBGene00011449
WBGene00003980		WBGene00195063			WBGene00011451
WBGene00003982		WBGene00206373			WBGene00011474
WBGene00003986		WBGene00206487			WBGene00011480
WBGene00003989		WBGene00219376			WBGene00011482
WBGene00003991		WBGene00220250			WBGene00011488
WBGene00003995		WBGene00235289			WBGene00011493
WBGene00003996		WBGene00235310			WBGene00011500
WBGene00003997		WBGene00235369			WBGene00011502
WBGene00003998		WBGene00235383			WBGene00011510
WBGene00003999		WBGene00255594			WBGene00011517
WBGene00004000					WBGene00011524
WBGene00004001					WBGene00011526
WBGene00004002					WBGene00011529
WBGene00004003					WBGene00011538
WBGene00004005					WBGene00011543
WBGene00004006					WBGene00011579
WBGene00004007					WBGene00011582
WBGene00004008					WBGene00011590
WBGene00004011					WBGene00011605
WBGene00004013					WBGene00011612
WBGene00004014					WBGene00011625
WBGene00004015					WBGene00011629
WBGene00004016					WBGene00011637
WBGene00004017					WBGene00011638
WBGene00004020					WBGene00011642
WBGene00004023					WBGene00011648
WBGene00004024					WBGene00011662
WBGene00004025					WBGene00011671
WBGene00004026					WBGene00011672
WBGene00004028					WBGene00011674
WBGene00004029					WBGene00011675
WBGene00004030					WBGene00011677
WBGene00004031					WBGene00011687
WBGene00004032					WBGene00011697
WBGene00004033					WBGene00011705
WBGene00004034					WBGene00011717
WBGene00004035					WBGene00011718
WBGene00004036					WBGene00011719
WBGene00004038					WBGene00011722
WBGene00004039					WBGene00011731
WBGene00004040					WBGene00011734
WBGene00004042					WBGene00011735
WBGene00004043					WBGene00011758
WBGene00004044					WBGene00011761
WBGene00004045					WBGene00011767
WBGene00004046					WBGene00011771
WBGene00004047					WBGene00011775
WBGene00004048					WBGene00011791
WBGene00004049					WBGene00011814
WBGene00004050					WBGene00011815
WBGene00004051					WBGene00011821
WBGene00004052					WBGene00011826
WBGene00004053					WBGene00011827
WBGene00004055					WBGene00011832
WBGene00004056					WBGene00011850
WBGene00004058					WBGene00011858
WBGene00004059					WBGene00011860
WBGene00004060					WBGene00011867
WBGene00004061					WBGene00011872
WBGene00004062					WBGene00011884
WBGene00004063					WBGene00011892
WBGene00004064					WBGene00011904
WBGene00004068					WBGene00011912
WBGene00004075					WBGene00011914
WBGene00004076					WBGene00011917
WBGene00004077					WBGene00011923
WBGene00004083					WBGene00011935
WBGene00004085					WBGene00011938
WBGene00004086					WBGene00011944
WBGene00004087					WBGene00011962
WBGene00004088					WBGene00011967
WBGene00004089					WBGene00011975
WBGene00004090					WBGene00011976
WBGene00004091					WBGene00011995
WBGene00004092					WBGene00012000
WBGene00004095					WBGene00012004
WBGene00004101					WBGene00012007
WBGene00004104					WBGene00012015
WBGene00004109					WBGene00012017
WBGene00004117					WBGene00012019
WBGene00004121					WBGene00012020
WBGene00004130					WBGene00012030
WBGene00004131					WBGene00012031
WBGene00004134					WBGene00012033
WBGene00004135					WBGene00012037
WBGene00004136					WBGene00012059
WBGene00004140					WBGene00012095
WBGene00004143					WBGene00012097
WBGene00004147					WBGene00012105
WBGene00004151					WBGene00012126
WBGene00004166					WBGene00012127
WBGene00004178					WBGene00012128
WBGene00004179					WBGene00012142
WBGene00004180					WBGene00012144
WBGene00004181					WBGene00012148
WBGene00004182					WBGene00012187
WBGene00004183					WBGene00012192
WBGene00004184					WBGene00012193
WBGene00004185					WBGene00012203
WBGene00004186					WBGene00012204
WBGene00004187					WBGene00012205
WBGene00004188					WBGene00012208
WBGene00004189					WBGene00012225
WBGene00004190					WBGene00012230
WBGene00004191					WBGene00012258
WBGene00004192					WBGene00012298
WBGene00004193					WBGene00012316
WBGene00004194					WBGene00012319
WBGene00004195					WBGene00012337
WBGene00004196					WBGene00012341
WBGene00004197					WBGene00012344
WBGene00004198					WBGene00012348
WBGene00004199					WBGene00012351
WBGene00004201					WBGene00012353
WBGene00004203					WBGene00012360
WBGene00004204					WBGene00012361
WBGene00004205					WBGene00012362
WBGene00004206					WBGene00012370
WBGene00004207					WBGene00012375
WBGene00004208					WBGene00012386
WBGene00004209					WBGene00012390
WBGene00004210					WBGene00012448
WBGene00004211					WBGene00012458
WBGene00004212					WBGene00012459
WBGene00004213					WBGene00012460
WBGene00004214					WBGene00012463
WBGene00004215					WBGene00012476
WBGene00004216					WBGene00012479
WBGene00004217					WBGene00012497
WBGene00004218					WBGene00012514
WBGene00004219					WBGene00012518
WBGene00004220					WBGene00012528
WBGene00004221					WBGene00012530
WBGene00004222					WBGene00012538
WBGene00004223					WBGene00012543
WBGene00004224					WBGene00012544
WBGene00004225					WBGene00012550
WBGene00004226					WBGene00012553
WBGene00004227					WBGene00012555
WBGene00004228					WBGene00012556
WBGene00004229					WBGene00012559
WBGene00004230					WBGene00012578
WBGene00004231					WBGene00012606
WBGene00004232					WBGene00012608
WBGene00004233					WBGene00012638
WBGene00004234					WBGene00012641
[truncated: 5,813 more rows]

## Sheet: D) Results Comparisons
Only in OL1 (287)	Only in OL1.1 (530)	Common (7284)
WBGene00000223	WBGene00000045	WBGene00000001
WBGene00000250	WBGene00000047	WBGene00000002
WBGene00000267	WBGene00000051	WBGene00000003
WBGene00000425	WBGene00000079	WBGene00000004
WBGene00000487	WBGene00000082	WBGene00000018
WBGene00000551	WBGene00000083	WBGene00000020
WBGene00000562	WBGene00000138	WBGene00000022
WBGene00000563	WBGene00000239	WBGene00000023
WBGene00000905	WBGene00000395	WBGene00000035
WBGene00001214	WBGene00000401	WBGene00000036
WBGene00001240	WBGene00000402	WBGene00000037
WBGene00001345	WBGene00000423	WBGene00000038
WBGene00001598	WBGene00000442	WBGene00000039
WBGene00001599	WBGene00000648	WBGene00000040
WBGene00001600	WBGene00000700	WBGene00000041
WBGene00001601	WBGene00000750	WBGene00000042
WBGene00001653	WBGene00000755	WBGene00000043
WBGene00001726	WBGene00000779	WBGene00000044
WBGene00001732	WBGene00000797	WBGene00000046
WBGene00001852	WBGene00000987	WBGene00000048
WBGene00001869	WBGene00000990	WBGene00000049
WBGene00002220	WBGene00001044	WBGene00000050
WBGene00002827	WBGene00001106	WBGene00000053
WBGene00003002	WBGene00001164	WBGene00000054
WBGene00003031	WBGene00001250	WBGene00000055
WBGene00003087	WBGene00001252	WBGene00000056
WBGene00003236	WBGene00001373	WBGene00000057
WBGene00003499	WBGene00001424	WBGene00000058
WBGene00003507	WBGene00001441	WBGene00000059
WBGene00003520	WBGene00001517	WBGene00000060
WBGene00003521	WBGene00001518	WBGene00000061
WBGene00003522	WBGene00001588	WBGene00000062
WBGene00003524	WBGene00001603	WBGene00000063
WBGene00003525	WBGene00001606	WBGene00000064
WBGene00003531	WBGene00001607	WBGene00000065
WBGene00003591	WBGene00001617	WBGene00000066
WBGene00003785	WBGene00001619	WBGene00000067
WBGene00003790	WBGene00001788	WBGene00000068
WBGene00003792	WBGene00001820	WBGene00000069
WBGene00003801	WBGene00001828	WBGene00000070
WBGene00004004	WBGene00001831	WBGene00000071
WBGene00004057	WBGene00001835	WBGene00000072
WBGene00004114	WBGene00001838	WBGene00000073
WBGene00004115	WBGene00001914	WBGene00000074
WBGene00004132	WBGene00002067	WBGene00000075
WBGene00004146	WBGene00002072	WBGene00000080
WBGene00004349	WBGene00002186	WBGene00000081
WBGene00004508	WBGene00002193	WBGene00000086
WBGene00004509	WBGene00002194	WBGene00000089
WBGene00004510	WBGene00002195	WBGene00000090
WBGene00004765	WBGene00002204	WBGene00000092
WBGene00004928	WBGene00002206	WBGene00000093
WBGene00006050	WBGene00002208	WBGene00000095
WBGene00006051	WBGene00002210	WBGene00000096
WBGene00006052	WBGene00002224	WBGene00000097
WBGene00006053	WBGene00002234	WBGene00000098
WBGene00006375	WBGene00002240	WBGene00000099
WBGene00006450	WBGene00002250	WBGene00000100
WBGene00006499	WBGene00002975	WBGene00000101
WBGene00006656	WBGene00003006	WBGene00000102
WBGene00006719	WBGene00003029	WBGene00000103
WBGene00006784	WBGene00003075	WBGene00000105
WBGene00006864	WBGene00003100	WBGene00000106
WBGene00006947	WBGene00003160	WBGene00000107
WBGene00006948	WBGene00003165	WBGene00000108
WBGene00006950	WBGene00003169	WBGene00000109
WBGene00006952	WBGene00003173	WBGene00000110
WBGene00006953	WBGene00003218	WBGene00000111
WBGene00006954	WBGene00003238	WBGene00000112
WBGene00006955	WBGene00003380	WBGene00000113
WBGene00007068	WBGene00003386	WBGene00000114
WBGene00007141	WBGene00003533	WBGene00000115
WBGene00007153	WBGene00003535	WBGene00000116
WBGene00007307	WBGene00003536	WBGene00000117
WBGene00007356	WBGene00003537	WBGene00000118
WBGene00007362	WBGene00003538	WBGene00000120
WBGene00007602	WBGene00003539	WBGene00000121
WBGene00007764	WBGene00003540	WBGene00000122
WBGene00007820	WBGene00003541	WBGene00000123
WBGene00007846	WBGene00003542	WBGene00000137
WBGene00007847	WBGene00003543	WBGene00000139
WBGene00008065	WBGene00003544	WBGene00000140
WBGene00008144	WBGene00003545	WBGene00000142
WBGene00008159	WBGene00003546	WBGene00000143
WBGene00008161	WBGene00003547	WBGene00000144
WBGene00008162	WBGene00003548	WBGene00000145
WBGene00008291	WBGene00003549	WBGene00000146
WBGene00008478	WBGene00003550	WBGene00000147
WBGene00008533	WBGene00003551	WBGene00000148
WBGene00008707	WBGene00003552	WBGene00000149
WBGene00008714	WBGene00003553	WBGene00000150
WBGene00008762	WBGene00003554	WBGene00000155
WBGene00008787	WBGene00003598	WBGene00000156
WBGene00008829	WBGene00003601	WBGene00000157
WBGene00008891	WBGene00003629	WBGene00000158
WBGene00008910	WBGene00003709	WBGene00000159
WBGene00008932	WBGene00003845	WBGene00000160
WBGene00009009	WBGene00003933	WBGene00000161
WBGene00009251	WBGene00003934	WBGene00000162
WBGene00009362	WBGene00004026	WBGene00000163
WBGene00009578	WBGene00004030	WBGene00000164
WBGene00009582	WBGene00004050	WBGene00000165
WBGene00009587	WBGene00004053	WBGene00000166
WBGene00009743	WBGene00004104	WBGene00000169
WBGene00009796	WBGene00004182	WBGene00000170
WBGene00009897	WBGene00004347	WBGene00000171
WBGene00009937	WBGene00004374	WBGene00000172
WBGene00009942	WBGene00004748	WBGene00000173
WBGene00010155	WBGene00004813	WBGene00000174
WBGene00010409	WBGene00004814	WBGene00000175
WBGene00010626	WBGene00004815	WBGene00000176
WBGene00010766	WBGene00004816	WBGene00000177
WBGene00010770	WBGene00004818	WBGene00000178
WBGene00010796	WBGene00004819	WBGene00000180
WBGene00010828	WBGene00004820	WBGene00000181
WBGene00010888	WBGene00004821	WBGene00000182
WBGene00010913	WBGene00004822	WBGene00000183
WBGene00011059	WBGene00004823	WBGene00000184
WBGene00011266	WBGene00004824	WBGene00000187
WBGene00011291	WBGene00004825	WBGene00000188
WBGene00011313	WBGene00004826	WBGene00000189
WBGene00011372	WBGene00004827	WBGene00000190
WBGene00011381	WBGene00004862	WBGene00000192
WBGene00011382	WBGene00004900	WBGene00000193
WBGene00011414	WBGene00004901	WBGene00000195
WBGene00011424	WBGene00004902	WBGene00000196
WBGene00011444	WBGene00004904	WBGene00000197
WBGene00011469	WBGene00004906	WBGene00000198
WBGene00011578	WBGene00004908	WBGene00000199
WBGene00011636	WBGene00004909	WBGene00000200
WBGene00011659	WBGene00004911	WBGene00000201
WBGene00011665	WBGene00004925	WBGene00000202
WBGene00011698	WBGene00004962	WBGene00000203
WBGene00011699	WBGene00004972	WBGene00000204
WBGene00011742	WBGene00004976	WBGene00000205
WBGene00011780	WBGene00006371	WBGene00000206
WBGene00011890	WBGene00006372	WBGene00000207
WBGene00011948	WBGene00006374	WBGene00000208
WBGene00011949	WBGene00006441	WBGene00000209
WBGene00012121	WBGene00006459	WBGene00000210
WBGene00012188	WBGene00006522	WBGene00000211
WBGene00012317	WBGene00006539	WBGene00000212
WBGene00012457	WBGene00006545	WBGene00000213
WBGene00012474	WBGene00006546	WBGene00000214
WBGene00012610	WBGene00006547	WBGene00000215
WBGene00012664	WBGene00006549	WBGene00000216
WBGene00012757	WBGene00006553	WBGene00000217
WBGene00012791	WBGene00006554	WBGene00000218
WBGene00012802	WBGene00006558	WBGene00000219
WBGene00012826	WBGene00006559	WBGene00000220
WBGene00012942	WBGene00006583	WBGene00000222
WBGene00013021	WBGene00006591	WBGene00000224
WBGene00013049	WBGene00006592	WBGene00000225
WBGene00013100	WBGene00006624	WBGene00000226
WBGene00013138	WBGene00006625	WBGene00000227
WBGene00013240	WBGene00006679	WBGene00000228
WBGene00013273	WBGene00006685	WBGene00000229
WBGene00013307	WBGene00006686	WBGene00000230
WBGene00013325	WBGene00006688	WBGene00000231
WBGene00013350	WBGene00006695	WBGene00000232
WBGene00013351	WBGene00006865	WBGene00000233
WBGene00013359	WBGene00006895	WBGene00000235
WBGene00013507	WBGene00006922	WBGene00000236
WBGene00013581	WBGene00006935	WBGene00000238
WBGene00013583	WBGene00007044	WBGene00000240
WBGene00013700	WBGene00007154	WBGene00000241
WBGene00013782	WBGene00007349	WBGene00000242
WBGene00014035	WBGene00007394	WBGene00000244
WBGene00014078	WBGene00007397	WBGene00000246
WBGene00014233	WBGene00007592	WBGene00000247
WBGene00015040	WBGene00007691	WBGene00000248
WBGene00015041	WBGene00007692	WBGene00000249
WBGene00015042	WBGene00007693	WBGene00000251
WBGene00015043	WBGene00007695	WBGene00000252
WBGene00015044	WBGene00007929	WBGene00000253
WBGene00015045	WBGene00007930	WBGene00000254
WBGene00015131	WBGene00007938	WBGene00000256
WBGene00015330	WBGene00008039	WBGene00000257
WBGene00015399	WBGene00008076	WBGene00000259
WBGene00015400	WBGene00008086	WBGene00000262
WBGene00015457	WBGene00008223	WBGene00000265
WBGene00015458	WBGene00008231	WBGene00000266
WBGene00015559	WBGene00008247	WBGene00000269
WBGene00015641	WBGene00008248	WBGene00000270
WBGene00015642	WBGene00008249	WBGene00000271
WBGene00015649	WBGene00008250	WBGene00000274
WBGene00015689	WBGene00008251	WBGene00000275
WBGene00015841	WBGene00008259	WBGene00000276
WBGene00015957	WBGene00008266	WBGene00000277
WBGene00016024	WBGene00008267	WBGene00000279
WBGene00016032	WBGene00008269	WBGene00000280
WBGene00016037	WBGene00008280	WBGene00000281
WBGene00016120	WBGene00008397	WBGene00000282
WBGene00016153	WBGene00008449	WBGene00000283
WBGene00016160	WBGene00008451	WBGene00000289
WBGene00016327	WBGene00008453	WBGene00000292
WBGene00016499	WBGene00008490	WBGene00000293
WBGene00016705	WBGene00008552	WBGene00000294
WBGene00016786	WBGene00008599	WBGene00000295
WBGene00016794	WBGene00008609	WBGene00000296
WBGene00016798	WBGene00008610	WBGene00000298
WBGene00016801	WBGene00008661	WBGene00000301
WBGene00016865	WBGene00008663	WBGene00000366
WBGene00016903	WBGene00008730	WBGene00000367
WBGene00016933	WBGene00008732	WBGene00000368
WBGene00016997	WBGene00008749	WBGene00000369
WBGene00017065	WBGene00008799	WBGene00000371
WBGene00017120	WBGene00008929	WBGene00000372
WBGene00017344	WBGene00008952	WBGene00000373
WBGene00017508	WBGene00008977	WBGene00000375
WBGene00017598	WBGene00008987	WBGene00000376
WBGene00017601	WBGene00009039	WBGene00000377
WBGene00017638	WBGene00009129	WBGene00000378
WBGene00017709	WBGene00009160	WBGene00000379
WBGene00017711	WBGene00009241	WBGene00000380
WBGene00017814	WBGene00009272	WBGene00000381
WBGene00017968	WBGene00009278	WBGene00000382
WBGene00018016	WBGene00009315	WBGene00000383
WBGene00018024	WBGene00009343	WBGene00000386
WBGene00018318	WBGene00009448	WBGene00000387
WBGene00018366	WBGene00009500	WBGene00000388
WBGene00018417	WBGene00009595	WBGene00000389
WBGene00018433	WBGene00012424	WBGene00000477
WBGene00018564	WBGene00009604	WBGene00000390
WBGene00018661	WBGene00009753	WBGene00000391
WBGene00018851	WBGene00009790	WBGene00000392
WBGene00018886	WBGene00009799	WBGene00000393
WBGene00018911	WBGene00009827	WBGene00000396
WBGene00018912	WBGene00009888	WBGene00000397
WBGene00018926	WBGene00009921	WBGene00000399
WBGene00019079	WBGene00009954	WBGene00000403
WBGene00019085	WBGene00009962	WBGene00000405
WBGene00019248	WBGene00009999	WBGene00000406
WBGene00019362	WBGene00010036	WBGene00000407
WBGene00019380	WBGene00010070	WBGene00000408
WBGene00019470	WBGene00010077	WBGene00000409
WBGene00019471	WBGene00010264	WBGene00000410
WBGene00019472	WBGene00010270	WBGene00000411
WBGene00019473	WBGene00010275	WBGene00000412
WBGene00019509	WBGene00010307	WBGene00000413
WBGene00019565	WBGene00010416	WBGene00000414
WBGene00019600	WBGene00010417	WBGene00000415
WBGene00019751	WBGene00010421	WBGene00000416
WBGene00019779	WBGene00010434	WBGene00000417
WBGene00019917	WBGene00010562	WBGene00000419
WBGene00020012	WBGene00010569	WBGene00000420
WBGene00020035	WBGene00010621	WBGene00000421
WBGene00020287	WBGene00010636	WBGene00000422
WBGene00020330	WBGene00010712	WBGene00000424
WBGene00020386	WBGene00010741	WBGene00000426
[truncated: 7,032 more rows]
